# Supplementary material for: Transcriptome Sequence Analysis of an Ornamental Plant, Ananas comosus var. bracteatus, Revealed the Potential Unigenes Involved in Terpenoid and Phenylpropanoid Biosynthesis
Source: PLoS One. 2015 Mar 13;10(3):e0119153. doi: 10.1371/journal.pone.0119153 (PMC4358926; doi:10.1371/journal.pone.0119153)
Supplement: S3 Table — (XLSX) [file pone.0119153.s003.xlsx]

## Sheet: tBLASTX scores 
Contig name	genbank ID	% identity	alignment_length	mismatches	gap_openings	q_start	q_end	s_start	s_end	e value	score
c100.graph_c0	gi|326895468|gb|JI409271.1|	33.33	27	18	0	197	117	185	265	2.7	24.9
c10000.graph_c0	gi|326891920|gb|JI405723.1|	50	28	14	0	94	11	646	729	0.001	35.4
c1002.graph_c0	gi|326892284|gb|JI406087.1|	54.55	143	65	0	431	3	3	431	4e-51	195
c10023.graph_c0	gi|326893526|gb|JI407329.1|	52.38	21	10	0	106	168	65	3	0.097	29.5
c10024.graph_c0	gi|326890845|gb|JI404648.1|	50	20	10	0	90	31	109	168	0.48	27.6
c1003.graph_c0	gi|326896152|gb|JI409955.1|	46.15	26	14	0	162	85	149	72	0.27	28.1
c10030.graph_c0	gi|326891608|gb|JI405411.1|	40.74	27	16	0	187	267	176	256	0.009	27.2
c10041.graph_c0	gi|326894096|gb|JI407899.1|	68.75	16	5	0	84	131	545	592	0.87	26.3
c10049.graph_c0	gi|326892548|gb|JI406351.1|	52.94	17	8	0	180	230	11	61	1.4	25.8
c1005.graph_c0	gi|326886544|gb|JI400347.1|	46.15	26	14	0	72	149	152	229	0.31	29
c10065.graph_c0	gi|326887615|gb|JI401418.1|	50	18	9	0	171	118	198	145	0.022	26.3
c1007.graph_c0	gi|326895720|gb|JI409523.1|	52.38	21	10	0	84	146	3	65	0.41	27.6
c1008.graph_c0	gi|326895508|gb|JI409311.1|	25.71	35	26	0	175	71	64	168	0.49	27.2
c101.graph_c0	gi|326895558|gb|JI409361.1|	47.83	69	36	0	164	370	289	83	4e-24	88.6
c1010.graph_c0	gi|326892221|gb|JI406024.1|	72.73	11	3	0	80	48	204	172	0.47	27.2
c1011.graph_c0	gi|326887344|gb|JI401147.1|	40.91	22	13	0	154	89	237	302	2.7	25.4
c10155.graph_c0	gi|326894425|gb|JI408228.1|	46.15	26	14	0	117	194	294	217	0.24	29.5
c10193.graph_c0	gi|326892616|gb|JI406419.1|	35.71	28	18	0	99	182	8	91	0.57	27.6
c10203.graph_c0	gi|326894349|gb|JI408152.1|	44.3	79	44	0	109	345	319	83	5e-16	71.9
c10228.graph_c0	gi|326897981|gb|JI411784.1|	30.36	56	39	0	267	100	313	146	0.054	31.8
c10265.graph_c0	gi|326895017|gb|JI408820.1|	50	18	9	0	291	344	51	104	0.44	28.3
c1028.graph_c0	gi|326898296|gb|JI412099.1|	31.58	19	13	0	48	104	249	193	1.2	25.8
c10283.graph_c0	gi|326887581|gb|JI401384.1|	36.36	33	21	0	205	107	204	106	0.0006	30.4
c1030.graph_c0	gi|326889965|gb|JI403768.1|	58.33	72	30	0	231	16	3	218	2e-21	95.1
c1031.graph_c0	gi|326895476|gb|JI409279.1|	40.91	22	13	0	138	203	570	635	0.49	28.1
c1033.graph_c0	gi|326893836|gb|JI407639.1|	47.62	21	11	0	157	95	773	835	0.094	29.5
c10338.graph_c0	gi|326890766|gb|JI404569.1|	52.38	21	10	0	202	140	170	232	0.32	28.6
c10344.graph_c0	gi|326887660|gb|JI401463.1|	35.29	34	22	0	212	313	32	133	0.028	32.2
c10353.graph_c0	gi|326895266|gb|JI409069.1|	55	20	9	0	85	26	173	114	0.17	29
c10375.graph_c0	gi|326887691|gb|JI401494.1|	40.74	27	16	0	325	245	103	183	0.36	29
c1038.graph_c0	gi|326894714|gb|JI408517.1|	43.33	30	17	0	78	167	101	190	0.078	31.3
c10385.graph_c0	gi|326895624|gb|JI409427.1|	34.38	32	21	0	90	185	441	536	0.84	27.2
c1047.graph_c0	gi|326895452|gb|JI409255.1|	32.14	28	19	0	254	171	200	117	0.93	26.7
c10477.graph_c0	gi|326887713|gb|JI401516.1|	62.96	27	10	0	245	165	221	301	0.0006	38.2
c10484.graph_c0	gi|326893866|gb|JI407669.1|	42.86	14	8	0	173	214	159	118	1	26.7
c105.graph_c0	gi|326897409|gb|JI411212.1|	30	30	21	0	48	137	339	250	0.24	28.1
c10574.graph_c0	gi|326897483|gb|JI411286.1|	52.38	21	10	0	222	160	98	160	0.2	29
c10609.graph_c0	gi|326895258|gb|JI409061.1|	39.13	23	14	0	116	48	399	467	0.46	27.2
c10642.graph_c0	gi|326894604|gb|JI408407.1|	53.33	15	7	0	467	511	78	34	1.7	27.2
c10668.graph_c0	gi|326889760|gb|JI403563.1|	41.18	34	20	0	104	3	45	146	0.51	28.1
c1067.graph_c0	gi|326890422|gb|JI404225.1|	52.94	17	8	0	138	188	70	20	0.45	27.6
c1069.graph_c0	gi|326898178|gb|JI411981.1|	37.21	43	27	0	59	187	188	60	2e-06	45.5
c10691.graph_c0	gi|326894352|gb|JI408155.1|	37.93	29	18	0	210	296	112	26	0.26	29
c10702.graph_c0	gi|326890056|gb|JI403859.1|	46.67	15	8	0	248	204	62	106	3.2	25.8
c10718.graph_c0	gi|326894694|gb|JI408497.1|	29.63	27	19	0	155	235	114	34	0.089	29.9
c10747.graph_c0	gi|326894803|gb|JI408606.1|	75.47	53	13	0	160	2	468	310	5e-43	114
c10779.graph_c0	gi|326892928|gb|JI406731.1|	39.39	33	20	0	204	106	97	195	0.014	32.2
c10802.graph_c0	gi|326894429|gb|JI408232.1|	64.29	14	5	0	42	1	178	137	0.28	29
c10850.graph_c0	gi|326895870|gb|JI409673.1|	73.47	49	13	0	283	137	78	224	3e-31	107
c10873.graph_c0	gi|326896382|gb|JI410185.1|	58.33	12	5	0	242	277	266	301	0.014	27.2
c1088.graph_c0	gi|326895590|gb|JI409393.1|	57.89	19	8	0	101	45	172	116	0.1	29.5
c10978.graph_c0	gi|326895004|gb|JI408807.1|	37.04	27	17	0	1	81	233	313	0.39	29
c1099.graph_c0	gi|326896209|gb|JI410012.1|	32	25	17	0	80	6	102	28	0.12	29.5
c10992.graph_c0	gi|326891812|gb|JI405615.1|	53.33	15	7	0	210	166	269	313	0.054	30.4
c110.graph_c0	gi|326889035|gb|JI402838.1|	34.29	35	23	0	57	161	107	3	0.049	30.4
c1100.graph_c0	gi|326893099|gb|JI406902.1|	61.54	13	5	0	124	162	66	104	1.1	25.8
c1100.graph_c1	gi|326890064|gb|JI403867.1|	47.62	21	11	0	152	214	553	491	0.87	26.3
c11023.graph_c0	gi|326898254|gb|JI412057.1|	36.67	30	19	0	182	93	93	4	0.006	33.6
c1104.graph_c0	gi|326897970|gb|JI411773.1|	37.5	24	15	0	72	1	134	63	0.85	26.3
c1105.graph_c0	gi|326887795|gb|JI401598.1|	59.09	22	9	0	125	60	111	46	0.16	28.6
c1110.graph_c0	gi|326892852|gb|JI406655.1|	40	25	15	0	130	204	149	223	0.45	27.2
c1111.graph_c0	gi|326896986|gb|JI410789.1|	33.33	30	20	0	31	120	212	123	0.65	26.7
c1111.graph_c1	gi|326894909|gb|JI408712.1|	57.14	14	6	0	58	99	734	693	0.26	28.1
c1113.graph_c0	gi|326898137|gb|JI411940.1|	35	40	26	0	120	1	107	226	0.011	33.6
c11150.graph_c0	gi|326889670|gb|JI403473.1|	40.74	27	16	0	303	383	102	182	0.87	27.6
c11155.graph_c0	gi|326892428|gb|JI406231.1|	62.5	16	6	0	3	50	212	165	0.01	33.6
c11174.graph_c0	gi|326889402|gb|JI403205.1|	54.55	11	5	0	242	274	197	229	0.27	22.1
c11269.graph_c0	gi|326895834|gb|JI409637.1|	38.46	26	16	0	227	304	521	598	1.4	26.7
c1127.graph_c0	gi|326894601|gb|JI408404.1|	48	25	13	0	125	51	124	198	0.067	30.9
c11274.graph_c0	gi|326894730|gb|JI408533.1|	45.83	24	13	0	126	197	320	249	0.027	32.2
c1131.graph_c0	gi|326895158|gb|JI408961.1|	58.82	51	21	0	207	55	65	217	5e-21	77.6
c11332.graph_c0	gi|326894604|gb|JI408407.1|	45.45	33	18	0	213	311	103	201	0.29	29.5
c11339.graph_c0	gi|326888011|gb|JI401814.1|	83.33	60	10	0	2	181	156	335	7e-29	119
c1134.graph_c0	gi|326889509|gb|JI403312.1|	70.59	68	20	0	85	288	279	76	1e-22	99.6
c11348.graph_c0	gi|326894852|gb|JI408655.1|	53.85	52	24	0	200	355	425	580	3e-14	72.1
c1135.graph_c0	gi|326897661|gb|JI411464.1|	50	20	10	0	46	105	233	174	0.17	28.6
c11350.graph_c0	gi|326887373|gb|JI401176.1|	30.43	46	32	0	516	653	39	176	0.83	28.6
c1137.graph_c0	gi|326892633|gb|JI406436.1|	37.93	29	18	0	19	105	241	155	1.1	26.3
c11378.graph_c0	gi|326890062|gb|JI403865.1|	45.45	22	12	0	146	81	264	199	1.1	25.8
c11400.graph_c0	gi|326894022|gb|JI407825.1|	45.45	22	12	0	82	17	123	58	0.4	27.2
c1141.graph_c0	gi|326894589|gb|JI408392.1|	35.71	28	18	0	116	33	219	136	0.76	27.2
c11456.graph_c0	gi|326897864|gb|JI411667.1|	50	18	9	0	295	348	145	92	0.21	29.5
c1151.graph_c0	gi|326892394|gb|JI406197.1|	28.89	45	32	0	55	189	389	523	0.057	30.4
c11527.graph_c0	gi|326886516|gb|JI400319.1|	44.44	18	10	0	185	238	335	282	0.61	27.2
c1154.graph_c0	gi|326895585|gb|JI409388.1|	55.56	18	8	0	146	93	212	159	0.069	29.9
c1159.graph_c0	gi|326891613|gb|JI405416.1|	50	20	10	0	37	96	188	247	0.26	29.5
c11601.graph_c0	gi|326896353|gb|JI410156.1|	57.69	26	11	0	84	7	86	9	8e-05	39.6
c11602.graph_c0	gi|326889128|gb|JI402931.1|	50	18	9	0	318	371	519	572	0.1	25.4
c11604.graph_c0	gi|326886949|gb|JI400752.1|	39.13	23	14	0	197	129	17	85	1.5	26.7
c11605.graph_c0	gi|326897291|gb|JI411094.1|	45.83	24	13	0	101	30	2	73	0.047	31.3
c11610.graph_c0	gi|326895301|gb|JI409104.1|	44.44	27	15	0	931	851	602	522	0.43	30.4
c11619.graph_c0	gi|326886960|gb|JI400763.1|	57.89	19	8	0	46	102	49	105	0.28	29
c11629.graph_c0	gi|326890170|gb|JI403973.1|	57.14	21	9	0	120	58	174	112	0.054	30.4
c11661.graph_c0	gi|326895153|gb|JI408956.1|	41.67	24	14	0	166	95	58	129	0.14	29.9
c1168.graph_c0	gi|326890333|gb|JI404136.1|	34.78	23	15	0	84	152	99	31	0.35	28.1
c1170.graph_c0	gi|326893031|gb|JI406834.1|	64.71	17	6	0	5	55	104	54	0.47	28.6
c11711.graph_c0	gi|326887122|gb|JI400925.1|	78.95	19	4	0	2	58	59	3	7e-05	40.9
c11734.graph_c0	gi|326889650|gb|JI403453.1|	33.33	27	18	0	351	431	192	112	0.11	30.9
c11807.graph_c0	gi|326888944|gb|JI402747.1|	68.42	19	6	0	20	76	178	122	0.15	29.5
c11837.graph_c0	gi|326897710|gb|JI411513.1|	35.19	54	35	0	33	194	73	234	0.002	34.7
c1184.graph_c0	gi|326895415|gb|JI409218.1|	48.48	33	17	0	13	111	355	453	0.001	35.9
c1185.graph_c0	gi|326897044|gb|JI410847.1|	42.11	19	11	0	208	152	90	34	0.92	26.7
c11859.graph_c0	gi|326892028|gb|JI405831.1|	42.86	21	12	0	25	87	707	645	0.81	27.2
c11867.graph_c0	gi|326898264|gb|JI412067.1|	66.67	12	4	0	249	214	128	163	0.079	30.4
c11874.graph_c0	gi|326887063|gb|JI400866.1|	45.83	24	13	0	134	205	376	305	0.002	35.9
c11880.graph_c0	gi|326894495|gb|JI408298.1|	47.37	19	10	0	58	114	324	380	1.2	26.3
c11883.graph_c0	gi|326895782|gb|JI409585.1|	58.82	17	7	0	3	53	67	17	0.47	27.6
c1189.graph_c0	gi|326894937|gb|JI408740.1|	55	20	9	0	227	168	363	304	0.006	33.6
c1191.graph_c0	gi|326894960|gb|JI408763.1|	42.86	28	16	0	89	6	576	659	0.017	32.1
c11951.graph_c0	gi|326895514|gb|JI409317.1|	34.38	32	21	0	115	20	688	593	1	26.3
c11976.graph_c0	gi|326897313|gb|JI411116.1|	40.74	27	16	0	59	139	266	186	0.16	29.5
c11985.graph_c0	gi|326891737|gb|JI405540.1|	34.62	52	34	0	166	11	45	200	0.004	34.1
c11998.graph_c0	gi|326891964|gb|JI405767.1|	46.15	26	14	0	112	35	17	94	0.063	31.3
c12.graph_c0	gi|326891864|gb|JI405667.1|	60	15	6	0	150	106	149	105	0.94	26.3
c12002.graph_c0	gi|326888646|gb|JI402449.1|	58.33	12	5	0	196	161	432	397	1.3	26.3
c12012.graph_c0	gi|326895137|gb|JI408940.1|	35.71	28	18	0	251	168	829	746	1.7	25.8
c1202.graph_c0	gi|326888311|gb|JI402114.1|	100	6	0	0	58	41	205	188	0.15	24.9
c12041.graph_c0	gi|326893663|gb|JI407466.1|	38.24	34	21	0	84	185	106	207	0.41	28.1
c12044.graph_c0	gi|326898219|gb|JI412022.1|	31.58	38	26	0	101	214	66	179	0.43	28.1
c12050.graph_c0	gi|326897025|gb|JI410828.1|	34.62	26	17	0	22	99	264	187	0.89	26.1
c1207.graph_c0	gi|326887896|gb|JI401699.1|	72.73	11	3	0	68	100	269	237	1.6	25.4
c12077.graph_c0	gi|326894901|gb|JI408704.1|	56.25	16	7	0	28	75	531	484	0.74	27.6
c121.graph_c0	gi|326894961|gb|JI408764.1|	52.38	21	10	0	259	321	234	172	0.38	28.6
c12116.graph_c0	gi|326896132|gb|JI409935.1|	52.63	19	9	0	130	74	131	187	0.13	29.9
c12134.graph_c0	gi|326890981|gb|JI404784.1|	30	30	21	0	105	16	157	68	0.6	28.1
c12157.graph_c0	gi|326889828|gb|JI403631.1|	52.38	21	10	0	120	58	120	58	0.2	29.5
c12164.graph_c0	gi|326891880|gb|JI405683.1|	55.56	18	8	0	199	146	56	3	0.73	26.4
c12175.graph_c0	gi|326894960|gb|JI408763.1|	33.33	45	30	0	95	229	531	665	0.32	28.6
c12205.graph_c0	gi|326897931|gb|JI411734.1|	38.46	26	16	0	152	75	113	36	0.51	27.6
c12208.graph_c0	gi|326894047|gb|JI407850.1|	40.91	22	13	0	606	541	293	358	0.12	25.4
c12214.graph_c0	gi|326888700|gb|JI402503.1|	62.5	16	6	0	327	280	131	178	0.49	28.1
c12218.graph_c0	gi|326893954|gb|JI407757.1|	33.33	24	16	0	94	165	675	604	1.2	25.8
c12220.graph_c0	gi|326888264|gb|JI402067.1|	55.56	18	8	0	48	101	97	150	0.79	26.7
c1224.graph_c0	gi|326890946|gb|JI404749.1|	47.37	19	10	0	11	67	240	184	0.19	28.6
c12246.graph_c0	gi|326895818|gb|JI409621.1|	38.1	21	13	0	102	164	121	183	3.9	25.8
c12252.graph_c0	gi|326894417|gb|JI408220.1|	53.33	15	7	0	225	269	77	33	0.75	28.6
c12259.graph_c0	gi|326893426|gb|JI407229.1|	33.33	42	28	0	132	257	221	96	0.093	29.9
c1227.graph_c0	gi|326891090|gb|JI404893.1|	45.83	24	13	0	225	154	181	110	0.19	28.6
c1228.graph_c0	gi|326894359|gb|JI408162.1|	43.33	30	17	0	129	218	65	154	0.35	27.6
c12281.graph_c0	gi|326895277|gb|JI409080.1|	53.85	13	6	0	401	363	139	177	0.15	30.4
c12299.graph_c0	gi|326890486|gb|JI404289.1|	31.82	44	30	0	140	271	458	589	0.57	27.6
c123.graph_c0	gi|326895969|gb|JI409772.1|	37.5	32	20	0	242	147	189	284	0.052	30.9
c12316.graph_c0	gi|326897675|gb|JI411478.1|	33.33	24	16	0	230	159	273	202	0.29	28.6
c12322.graph_c0	gi|326896050|gb|JI409853.1|	32.14	28	19	0	260	343	206	289	0.62	29.5
c1234.graph_c0	gi|326889826|gb|JI403629.1|	48	25	13	0	2	76	347	273	0.005	34.1
c12342.graph_c0	gi|326889896|gb|JI403699.1|	60	15	6	0	110	66	209	253	0.013	24.6
c12347.graph_c0	gi|326893030|gb|JI406833.1|	51.85	27	13	0	88	8	3	83	0.007	35.4
c1238.graph_c0	gi|326893032|gb|JI406835.1|	51.85	27	13	0	81	1	108	188	0.0003	37.7
c12416.graph_c0	gi|326890924|gb|JI404727.1|	72.73	11	3	0	40	8	122	154	0.46	27.2
c12429.graph_c0	gi|326897328|gb|JI411131.1|	57.89	19	8	0	162	106	53	109	1.3	26.3
c1244.graph_c0	gi|326894449|gb|JI408252.1|	60	15	6	0	87	131	196	240	0.83	26.3
c12441.graph_c0	gi|326894913|gb|JI408716.1|	62.07	58	22	0	48	221	130	303	3e-25	107
c1245.graph_c0	gi|326889503|gb|JI403306.1|	47.06	34	18	0	86	187	285	184	0.44	28.6
c1246.graph_c0	gi|326893433|gb|JI407236.1|	43.48	23	13	0	66	134	38	106	0.049	30.4
c1247.graph_c0	gi|326892380|gb|JI406183.1|	52	25	12	0	192	118	108	34	0.073	30.4
c12475.graph_c0	gi|326891925|gb|JI405728.1|	58.82	17	7	0	229	279	107	57	0.49	27.8
c1248.graph_c0	gi|326890155|gb|JI403958.1|	30.43	23	16	0	48	116	353	421	0.32	27.6
c12482.graph_c0	gi|326892403|gb|JI406206.1|	37.5	24	15	0	163	234	363	292	0.57	27.2
c1252.graph_c0	gi|326886894|gb|JI400697.1|	29.03	62	44	0	17	202	168	353	0.0003	38.6
c1254.graph_c0	gi|326887041|gb|JI400844.1|	34.38	32	21	0	245	150	76	171	0.81	26.7
c12552.graph_c0	gi|326889560|gb|JI403363.1|	50	22	11	0	80	15	263	198	0.51	27.6
c12576.graph_c0	gi|326894776|gb|JI408579.1|	75	56	14	0	188	21	77	244	1e-21	95.6
c1258.graph_c0	gi|326895857|gb|JI409660.1|	38.46	26	16	0	215	292	264	341	1.6	26.7
c1261.graph_c0	gi|326894333|gb|JI408136.1|	40.91	22	13	0	114	49	452	387	0.027	24
c12612.graph_c0	gi|326891332|gb|JI405135.1|	40	30	18	0	238	149	108	197	0.47	27.6
c12639.graph_c0	gi|326890201|gb|JI404004.1|	46.15	26	14	0	18	95	25	102	0.029	26.3
c12656.graph_c0	gi|326894833|gb|JI408636.1|	84.51	71	11	0	22	234	3	215	6e-38	149
c1267.graph_c0	gi|326895510|gb|JI409313.1|	38.24	34	21	0	313	212	673	572	1.9	26.7
c12674.graph_c0	gi|326892138|gb|JI405941.1|	52.63	19	9	0	77	21	237	181	0.01	33.1
c12675.graph_c0	gi|326895622|gb|JI409425.1|	76.92	13	3	0	181	143	67	29	0.08	30.9
c12679.graph_c0	gi|326894788|gb|JI408591.1|	81.82	11	2	0	130	98	24	56	1.4	26.3
c12682.graph_c0	gi|326895247|gb|JI409050.1|	45	20	11	0	186	127	639	698	0.92	26.3
c1269.graph_c0	gi|326893078|gb|JI406881.1|	46.15	26	14	0	152	229	102	179	0.051	30.9
c12691.graph_c0	gi|326894744|gb|JI408547.1|	44	25	14	0	258	184	143	217	0.018	32.7
c1274.graph_c0	gi|326896944|gb|JI410747.1|	73.33	15	4	0	157	113	235	191	0.065	30.9
c12740.graph_c0	gi|326891443|gb|JI405246.1|	41.18	34	20	0	38	139	124	23	0.89	27.2
c12752.graph_c0	gi|326894097|gb|JI407900.1|	48	25	13	0	211	137	179	253	0.3	29.5
c12783.graph_c0	gi|326891380|gb|JI405183.1|	42.42	33	19	0	104	6	135	233	2	25.8
c1279.graph_c0	gi|326894652|gb|JI408455.1|	50	20	10	0	118	59	130	71	0.61	26.7
c1280.graph_c0	gi|326887805|gb|JI401608.1|	66.04	53	18	0	204	46	84	242	4e-20	90.5
c1287.graph_c0	gi|326895531|gb|JI409334.1|	45.45	22	12	0	183	118	935	870	0.61	26.7
c12880.graph_c0	gi|326895152|gb|JI408955.1|	41.67	24	14	0	273	344	1	72	0.11	30.4
c1289.graph_c0	gi|326889822|gb|JI403625.1|	29.17	48	34	0	178	35	275	132	0.37	28.6
c129.graph_c0	gi|326895626|gb|JI409429.1|	65.22	23	8	0	224	156	136	68	0.0002	38.2
c12953.graph_c0	gi|326891261|gb|JI405064.1|	44.83	29	16	0	112	26	91	177	1.1	25.8
c13.graph_c0	gi|326892900|gb|JI406703.1|	30.56	36	25	0	157	264	173	66	0.36	28.1
c1300.graph_c0	gi|326891986|gb|JI405789.1|	38.71	31	19	0	70	162	130	222	0.034	30.9
c13035.graph_c0	gi|326890339|gb|JI404142.1|	44.44	45	25	0	325	459	363	229	2e-06	46.4
c1304.graph_c0	gi|326892940|gb|JI406743.1|	37.5	40	25	0	162	281	76	195	0.05	31.3
c13043.graph_c0	gi|326896581|gb|JI410384.1|	40.91	22	13	0	61	126	54	119	0.62	27.6
c1306.graph_c0	gi|326889967|gb|JI403770.1|	48	25	13	0	156	82	19	93	8.3	24
c1307.graph_c0	gi|326895774|gb|JI409577.1|	50	16	8	0	278	325	475	522	0.49	28.1
c1307.graph_c1	gi|326890714|gb|JI404517.1|	40.91	22	13	0	107	172	319	254	0.25	28.1
c1309.graph_c0	gi|326896824|gb|JI410627.1|	66.67	15	5	0	192	148	274	230	0.79	26.3
c13131.graph_c0	gi|326887581|gb|JI401384.1|	37.5	24	15	0	88	17	79	8	2.7	25.4
c13150.graph_c0	gi|326889653|gb|JI403456.1|	33.33	36	24	0	254	147	157	264	0.48	27.6
c1317.graph_c0	gi|326888190|gb|JI401993.1|	38.46	26	16	0	89	166	106	29	0.26	27.9
c13179.graph_c0	gi|326889506|gb|JI403309.1|	42.86	21	12	0	19	81	278	216	0.19	29
c13232.graph_c0	gi|326895978|gb|JI409781.1|	55.56	18	8	0	89	36	332	385	0.11	29.6
c13248.graph_c0	gi|326888133|gb|JI401936.1|	84.62	13	2	0	210	172	181	219	0.32	28.1
c1331.graph_c0	gi|326891423|gb|JI405226.1|	35.14	37	24	0	171	61	170	60	0.62	26.7
c13312.graph_c0	gi|326897889|gb|JI411692.1|	35.14	37	24	0	2	112	186	76	0.83	26.3
c13348.graph_c0	gi|326895897|gb|JI409700.1|	38.24	34	21	0	65	166	769	668	1	26.7
c13370.graph_c0	gi|326891353|gb|JI405156.1|	40	30	18	0	113	202	266	177	0.69	27.6
c13388.graph_c0	gi|326893845|gb|JI407648.1|	45	20	11	0	90	149	243	184	0.27	28.6
c1341.graph_c0	gi|326889468|gb|JI403271.1|	47.62	21	11	0	92	154	379	441	0.17	29.5
c13430.graph_c0	gi|326895023|gb|JI408826.1|	43.48	23	13	0	93	161	212	144	0.81	27.2
c13446.graph_c0	gi|326889087|gb|JI402890.1|	64	25	9	0	151	225	103	29	0.0007	36.8
c13449.graph_c0	gi|326896245|gb|JI410048.1|	33.33	30	20	0	218	129	8	97	0.26	29
c13451.graph_c0	gi|326895393|gb|JI409196.1|	58.82	17	7	0	144	94	689	739	0.88	27.2
c1348.graph_c0	gi|326895706|gb|JI409509.1|	50	20	10	0	170	229	86	27	0.7	27.6
c135.graph_c0	gi|326887528|gb|JI401331.1|	47.06	17	9	0	18	68	325	275	1.8	25.4
c13500.graph_c0	gi|326895843|gb|JI409646.1|	62.5	16	6	0	152	199	303	256	3.4	25.4
c13509.graph_c0	gi|326895453|gb|JI409256.1|	39.39	33	20	0	159	61	43	141	0.18	29.5
c13617.graph_c0	gi|326889654|gb|JI403457.1|	47.83	23	12	0	252	184	269	201	0.007	34.1
c1364.graph_c0	gi|326895418|gb|JI409221.1|	47.62	21	11	0	24	86	328	266	0.13	29
c13668.graph_c0	gi|326897614|gb|JI411417.1|	53.33	30	14	0	12	101	120	31	0.088	30.9
c13670.graph_c0	gi|326894640|gb|JI408443.1|	55.56	18	8	0	198	145	1165	1218	0.13	29.5
c13673.graph_c0	gi|326892041|gb|JI405844.1|	35.9	39	25	0	287	171	158	42	0.78	27.2
c13674.graph_c0	gi|326894570|gb|JI408373.1|	88	75	9	0	227	3	1537	1313	3e-42	164
c1368.graph_c0	gi|326889838|gb|JI403641.1|	34.15	41	27	0	109	231	105	227	0.76	27.2
c13687.graph_c0	gi|326892533|gb|JI406336.1|	36.36	33	21	0	14	112	231	133	0.046	31.8
c1369.graph_c0	gi|326894557|gb|JI408360.1|	46.15	26	14	0	55	132	827	904	0.062	30.4
c13690.graph_c0	gi|326888264|gb|JI402067.1|	43.48	23	13	0	117	49	130	198	0.65	27.2
c13716.graph_c0	gi|326895476|gb|JI409279.1|	48.28	29	15	0	211	125	685	771	0.06	30.9
c13723.graph_c0	gi|326895688|gb|JI409491.1|	33.33	27	18	0	225	305	49	129	0.59	28.1
c13728.graph_c0	gi|326887864|gb|JI401667.1|	40.48	42	25	0	63	188	450	325	0.002	35
c1373.graph_c0	gi|326891920|gb|JI405723.1|	26.15	65	48	0	173	367	322	516	2e-05	43.7
c13738.graph_c0	gi|326894502|gb|JI408305.1|	55	20	9	0	55	114	1027	968	0.59	28.6
c1374.graph_c0	gi|326895422|gb|JI409225.1|	30.77	26	18	0	27	104	90	167	0.46	27.2
c1374.graph_c1	gi|326887773|gb|JI401576.1|	58.33	24	10	0	19	90	83	12	0.002	35
c1375.graph_c0	gi|326896179|gb|JI409982.1|	40	20	12	0	68	127	340	281	0.69	27.2
c13777.graph_c0	gi|326893136|gb|JI406939.1|	76.92	13	3	0	133	171	361	323	0.17	28.6
c138.graph_c0	gi|326893688|gb|JI407491.1|	27.27	33	24	0	25	123	439	341	1.4	25.8
c13815.graph_c0	gi|326891177|gb|JI404980.1|	44	25	14	0	148	222	83	157	1.6	26.7
c13825.graph_c0	gi|326898216|gb|JI412019.1|	69.23	13	4	0	96	58	132	94	0.21	23.5
c13832.graph_c0	gi|326894843|gb|JI408646.1|	50	24	12	0	177	248	121	50	0.66	28.1
c1384.graph_c0	gi|326888890|gb|JI402693.1|	38.46	26	16	0	146	69	176	99	0.089	30.4
c13845.graph_c0	gi|326892762|gb|JI406565.1|	55.56	18	8	0	256	203	322	375	0.054	31.3
c13846.graph_c0	gi|326897470|gb|JI411273.1|	45.45	33	18	0	153	251	150	52	0.005	34.5
c1385.graph_c0	gi|326897378|gb|JI411181.1|	31.82	22	15	0	74	9	188	123	0.23	28.1
c1389.graph_c0	gi|326895643|gb|JI409446.1|	43.48	23	13	0	103	35	604	536	0.18	28.6
c13905.graph_c0	gi|326895222|gb|JI409025.1|	37.5	24	15	0	87	16	66	137	0.45	27.6
c1392.graph_c0	gi|326893493|gb|JI407296.1|	50	24	12	0	12	83	273	202	0.16	28.6
c13936.graph_c0	gi|326892507|gb|JI406310.1|	39.13	23	14	0	4	72	148	80	0.28	28.6
c1395.graph_c0	gi|326891644|gb|JI405447.1|	53.33	15	7	0	111	155	297	341	0.21	29.5
c1396.graph_c0	gi|326889878|gb|JI403681.1|	51.61	31	15	0	263	171	234	326	0.004	34.8
c13960.graph_c0	gi|326890121|gb|JI403924.1|	60	60	24	0	1	180	42	221	6e-24	103
c1397.graph_c0	gi|326898164|gb|JI411967.1|	37.21	43	27	0	75	203	20	148	0.01	32.7
c140.graph_c0	gi|326895609|gb|JI409412.1|	36	25	16	0	97	23	564	490	0.34	27.6
c1400.graph_c0	gi|326888346|gb|JI402149.1|	52.38	21	10	0	355	293	134	72	0.28	29
c1401.graph_c0	gi|326894979|gb|JI408782.1|	66.67	18	6	0	24	77	580	633	0.29	28.6
c14019.graph_c0	gi|326894489|gb|JI408292.1|	58.82	17	7	0	266	316	285	235	0.29	29
c1402.graph_c0	gi|326894892|gb|JI408695.1|	40.91	22	13	0	235	300	416	351	0.57	28.1
c14060.graph_c0	gi|326893012|gb|JI406815.1|	46.15	26	14	0	527	450	62	139	1.7	27.2
c14064.graph_c0	gi|326895508|gb|JI409311.1|	34.09	44	29	0	7	138	107	238	0.11	29.9
c14068.graph_c0	gi|326892812|gb|JI406615.1|	50	24	12	0	225	154	869	798	0.13	29.5
c1408.graph_c0	gi|326887568|gb|JI401371.1|	44.44	18	10	0	7	60	212	265	0.45	27.2
c14085.graph_c0	gi|326891453|gb|JI405256.1|	37.5	32	20	0	218	123	2	97	0.18	29.5
c141.graph_c0	gi|326890315|gb|JI404118.1|	45.45	22	12	0	247	182	172	107	1.7	25.8
c14101.graph_c0	gi|326894660|gb|JI408463.1|	53.19	47	22	0	198	58	188	48	5e-18	66.1
c1413.graph_c0	gi|326894714|gb|JI408517.1|	37.5	32	20	0	20	115	552	457	0.21	28.6
c14153.graph_c0	gi|326893118|gb|JI406921.1|	69.57	23	7	0	1	69	532	464	0.021	32.2
c1417.graph_c0	gi|326887536|gb|JI401339.1|	56.52	23	10	0	190	122	239	307	0.007	33.6
c14175.graph_c0	gi|326897678|gb|JI411481.1|	69.23	13	4	0	166	204	194	156	0.46	27.2
c1430.graph_c0	gi|326886863|gb|JI400666.1|	40	30	18	0	129	218	265	354	0.18	29.5
c14309.graph_c0	gi|326892910|gb|JI406713.1|	45.45	22	12	0	61	126	538	603	0.49	27.6
c1431.graph_c0	gi|326889922|gb|JI403725.1|	32.43	37	25	0	101	211	110	220	0.33	28.6
c14310.graph_c0	gi|326891109|gb|JI404912.1|	71.6	81	23	0	245	3	216	458	4e-54	144
c14312.graph_c0	gi|326894640|gb|JI408443.1|	37.93	29	18	0	272	358	468	554	0.093	31.3
c14317.graph_c0	gi|326891452|gb|JI405255.1|	40.74	27	16	0	75	155	171	91	0.048	30.4
c14318.graph_c0	gi|326894686|gb|JI408489.1|	47.06	34	18	0	371	270	56	157	0.004	35.4
c14319.graph_c0	gi|326892080|gb|JI405883.1|	32.56	43	29	0	341	213	165	37	0.001	37.3
c14321.graph_c0	gi|326889648|gb|JI403451.1|	45	20	11	0	60	119	178	237	0.058	30.4
c14325.graph_c0	gi|326888093|gb|JI401896.1|	36.11	36	23	0	156	49	250	143	0.02	31.8
c14329.graph_c0	gi|326893584|gb|JI407387.1|	45.45	22	12	0	17	82	124	59	0.23	29
c14334.graph_c0	gi|326887549|gb|JI401352.1|	52.94	17	8	0	395	345	57	7	0.69	28.1
c14342.graph_c0	gi|326890228|gb|JI404031.1|	40	30	18	0	213	124	122	33	0.17	29
c1435.graph_c0	gi|326887975|gb|JI401778.1|	29.17	48	34	0	210	67	37	180	0.33	28.6
c14351.graph_c0	gi|326893335|gb|JI407138.1|	30.77	39	27	0	219	103	195	311	0.22	29
c14353.graph_c0	gi|326893653|gb|JI407456.1|	37.04	27	17	0	109	189	274	354	0.057	31.3
c14357.graph_c0	gi|326893381|gb|JI407184.1|	50	20	10	0	70	129	199	258	0.057	30.9
c14371.graph_c0	gi|326889747|gb|JI403550.1|	33.33	36	24	0	24	131	212	105	0.11	30.4
c1438.graph_c0	gi|326897245|gb|JI411048.1|	58.82	17	7	0	64	114	153	203	1.1	26.3
c14380.graph_c0	gi|326895983|gb|JI409786.1|	50	26	13	0	93	170	4	81	0.054	30.9
c14387.graph_c0	gi|326896687|gb|JI410490.1|	37.5	24	15	0	44	115	302	231	0.19	29.5
c14396.graph_c0	gi|326887659|gb|JI401462.1|	41.67	24	14	0	218	289	55	126	0.23	23.1
c144.graph_c0	gi|326894652|gb|JI408455.1|	23.08	39	30	0	170	54	561	445	0.12	29
c1440.graph_c0	gi|326893418|gb|JI407221.1|	42.31	26	15	0	115	192	110	187	0.059	30.4
c14401.graph_c0	gi|326893799|gb|JI407602.1|	50	26	13	0	6	83	193	270	0.32	27.6
c14402.graph_c0	gi|326896349|gb|JI410152.1|	48	25	13	0	218	144	108	34	0.15	29.5
c14403.graph_c0	gi|326895777|gb|JI409580.1|	50	26	13	0	27	104	426	349	0.33	27.6
c14405.graph_c0	gi|326895525|gb|JI409328.1|	52.94	17	8	0	66	16	353	403	0.14	29.5
c1441.graph_c0	gi|326896396|gb|JI410199.1|	41.67	36	21	0	30	137	232	339	0.033	30.9
c14413.graph_c0	gi|326888010|gb|JI401813.1|	41.67	36	21	0	41	148	252	359	0.04	30.9
c14413.graph_c1	gi|326893760|gb|JI407563.1|	66.67	12	4	0	68	33	158	123	0.86	26.3
c14427.graph_c0	gi|326892951|gb|JI406754.1|	28.95	38	27	0	141	28	78	191	0.33	27.6
c1443.graph_c0	gi|326897742|gb|JI411545.1|	54.17	24	11	0	76	5	155	226	0.006	33.6
c14430.graph_c0	gi|326894976|gb|JI408779.1|	52.17	23	11	0	235	303	252	184	0.021	32.7
c14432.graph_c0	gi|326893703|gb|JI407506.1|	47.62	21	11	0	16	78	148	86	0.092	29.5
c14441.graph_c0	gi|326897687|gb|JI411490.1|	55.56	18	8	0	136	83	126	179	0.7	26.7
c14444.graph_c0	gi|326897653|gb|JI411456.1|	29.79	47	33	0	84	224	19	159	0.099	30.4
c14446.graph_c0	gi|326894859|gb|JI408662.1|	60	15	6	0	45	89	217	261	1.6	25.4
c1445.graph_c0	gi|326893240|gb|JI407043.1|	57.14	14	6	0	211	252	94	135	1.5	26.7
c1445.graph_c1	gi|326892055|gb|JI405858.1|	31.48	54	37	0	168	329	509	670	1	27.2
c14451.graph_c0	gi|326887906|gb|JI401709.1|	44.44	18	10	0	187	240	172	225	0.21	29
c14452.graph_c0	gi|326897827|gb|JI411630.1|	37.5	24	15	0	239	310	25	96	1.4	26.7
c14453.graph_c0	gi|326892163|gb|JI405966.1|	28.12	32	23	0	54	149	72	167	0.085	29.5
c14457.graph_c0	gi|326894432|gb|JI408235.1|	44.44	27	15	0	189	109	148	68	0.12	29.9
c14463.graph_c0	gi|326889498|gb|JI403301.1|	42.65	68	39	0	227	24	69	272	3e-13	68
c14464.graph_c0	gi|326890240|gb|JI404043.1|	47.37	19	10	0	22	78	136	80	1.1	26.3
c14465.graph_c0	gi|326895057|gb|JI408860.1|	47.83	23	12	0	40	108	71	3	0.12	29
c14468.graph_c0	gi|326897376|gb|JI411179.1|	37.14	35	22	0	355	251	211	107	0.044	31.9
c14472.graph_c0	gi|326893869|gb|JI407672.1|	37.5	32	20	0	30	125	119	24	0.94	28.1
c1448.graph_c0	gi|326892583|gb|JI406386.1|	50	24	12	0	251	180	435	364	0.51	27.6
c14482.graph_c0	gi|326895523|gb|JI409326.1|	66.67	12	4	0	257	292	300	265	1.8	26.7
c14484.graph_c0	gi|326896859|gb|JI410662.1|	36.96	46	29	0	222	85	200	63	0.084	30.9
c14487.graph_c0	gi|326887923|gb|JI401726.1|	56.25	16	7	0	181	134	175	128	0.35	27.6
c14489.graph_c0	gi|326886524|gb|JI400327.1|	47.06	17	9	0	80	130	156	206	0.86	27.6
c14492.graph_c0	gi|326894509|gb|JI408312.1|	47.83	23	12	0	194	126	55	123	0.9	26.3
c14496.graph_c0	gi|326896970|gb|JI410773.1|	56.52	23	10	0	205	137	9	77	0.18	29
c14498.graph_c0	gi|326891632|gb|JI405435.1|	66.67	18	6	0	181	128	238	291	0.41	28.1
c14506.graph_c0	gi|326889722|gb|JI403525.1|	40.91	22	13	0	198	133	154	89	1.1	25.8
c1451.graph_c0	gi|326888470|gb|JI402273.1|	42.11	19	11	0	107	51	7	63	2.1	25.8
c14529.graph_c0	gi|326894832|gb|JI408635.1|	40	30	18	0	25	114	185	274	0.16	29
c1454.graph_c0	gi|326889545|gb|JI403348.1|	40	25	15	0	132	58	142	216	0.46	27.2
c14541.graph_c0	gi|326890621|gb|JI404424.1|	68.57	70	22	0	3	212	84	293	6e-28	116
c14549.graph_c0	gi|326891164|gb|JI404967.1|	61.11	18	7	0	147	200	97	44	0.24	28.1
c14557.graph_c0	gi|326896229|gb|JI410032.1|	37.93	29	18	0	141	55	217	131	0.11	30.4
c1456.graph_c0	gi|326896061|gb|JI409864.1|	52.94	17	8	0	15	65	493	443	1.6	25.4
c14562.graph_c0	gi|326894910|gb|JI408713.1|	50	18	9	0	149	96	462	515	0.25	28.1
c14563.graph_c0	gi|326888626|gb|JI402429.1|	34.62	26	17	0	22	99	347	424	1.6	25.4
c14570.graph_c0	gi|326888985|gb|JI402788.1|	38.24	34	21	0	90	191	129	230	0.086	30.4
c14579.graph_c0	gi|326886579|gb|JI400382.1|	48.78	41	21	0	273	151	230	108	4e-06	44.6
c14581.graph_c0	gi|326888334|gb|JI402137.1|	44.12	34	19	0	400	299	141	40	0.027	32.7
c14582.graph_c0	gi|326892951|gb|JI406754.1|	54.62	119	54	0	452	808	1	357	1e-43	171
c14586.graph_c0	gi|326895013|gb|JI408816.1|	34.09	44	29	0	134	265	846	715	0.07	30.9
c14589.graph_c0	gi|326897600|gb|JI411403.1|	37.14	35	22	0	233	129	144	40	0.069	30.4
c14591.graph_c0	gi|326895337|gb|JI409140.1|	35.71	42	27	0	207	82	186	61	0.61	26.7
c14593.graph_c0	gi|326893488|gb|JI407291.1|	41.67	36	21	0	286	179	161	268	0.22	28.9
c14596.graph_c0	gi|326892601|gb|JI406404.1|	40	25	15	0	79	5	143	217	0.35	28.6
c14599.graph_c0	gi|326893792|gb|JI407595.1|	29.73	37	26	0	21	131	597	487	0.46	27.2
c1460.graph_c0	gi|326896055|gb|JI409858.1|	56.41	39	17	0	246	130	175	291	5e-10	57.4
c14608.graph_c0	gi|326895606|gb|JI409409.1|	38.46	39	24	0	206	90	164	48	0.081	30.4
c14615.graph_c0	gi|326891555|gb|JI405358.1|	40	20	12	0	110	51	121	62	0.59	24
c14621.graph_c0	gi|326891418|gb|JI405221.1|	44.44	27	15	0	203	123	326	246	0.2	30.4
c14626.graph_c0	gi|326894393|gb|JI408196.1|	35.9	39	25	0	3	119	324	208	1.2	26.7
c14631.graph_c0	gi|326888495|gb|JI402298.1|	31.03	29	20	0	14	100	163	77	0.59	26.7
c14635.graph_c0	gi|326897463|gb|JI411266.1|	36.84	19	12	0	203	147	111	167	0.63	26.7
c14642.graph_c0	gi|326894603|gb|JI408406.1|	100	8	0	0	245	222	1	24	0.11	25.4
c14646.graph_c0	gi|326892282|gb|JI406085.1|	27.08	48	35	0	206	63	690	547	0.046	30.9
c14651.graph_c0	gi|326893692|gb|JI407495.1|	44.44	45	25	0	135	1	563	429	4e-08	50.6
c14661.graph_c0	gi|326888939|gb|JI402742.1|	30.3	33	23	0	132	34	103	5	0.076	30.2
c14662.graph_c0	gi|326895049|gb|JI408852.1|	50	22	11	0	62	127	219	154	0.57	27.6
c14664.graph_c0	gi|326895563|gb|JI409366.1|	40	20	12	0	317	258	56	115	0.2	29.5
c14668.graph_c0	gi|326891364|gb|JI405167.1|	52.63	19	9	0	71	15	257	313	0.068	29.9
c14673.graph_c0	gi|326895231|gb|JI409034.1|	52	25	12	0	19	93	33	107	1.6	26.3
c14674.graph_c0	gi|326895969|gb|JI409772.1|	55.56	18	8	0	213	160	303	356	0.23	28.6
c14676.graph_c0	gi|326896762|gb|JI410565.1|	60	15	6	0	50	6	219	263	0.82	26.7
c1468.graph_c0	gi|326894677|gb|JI408480.1|	30.56	36	25	0	242	135	136	29	2	25.4
c14683.graph_c0	gi|326891304|gb|JI405107.1|	48	25	13	0	334	260	261	335	0.68	27.6
c14688.graph_c0	gi|326895838|gb|JI409641.1|	42.86	21	12	0	173	235	967	1029	1.6	26.3
c14690.graph_c0	gi|326893771|gb|JI407574.1|	40	40	24	0	233	114	184	303	0.014	33.1
c14693.graph_c0	gi|326893477|gb|JI407280.1|	71.19	59	17	0	178	2	124	300	6e-22	97.7
c14698.graph_c0	gi|326894077|gb|JI407880.1|	38.38	99	61	0	306	10	379	83	1e-18	86.5
c14701.graph_c0	gi|326896018|gb|JI409821.1|	52.38	21	10	0	131	193	205	143	0.76	26.3
c14702.graph_c0	gi|326892769|gb|JI406572.1|	37.93	29	18	0	142	56	144	58	0.093	29.5
c14706.graph_c0	gi|326895186|gb|JI408989.1|	50	18	9	0	363	310	183	236	0.007	27.2
c1471.graph_c0	gi|326897903|gb|JI411706.1|	48.39	31	16	0	97	189	254	162	2e-07	34.5
c14713.graph_c0	gi|326893887|gb|JI407690.1|	42.11	19	11	0	109	165	245	189	0.19	28.6
c14716.graph_c0	gi|326895666|gb|JI409469.1|	44	25	14	0	120	46	256	182	1.2	25.8
c14719.graph_c0	gi|326892500|gb|JI406303.1|	50	24	12	0	203	132	118	47	0.065	29.9
c14721.graph_c0	gi|326896024|gb|JI409827.1|	52.63	19	9	0	157	101	178	122	0.98	26.7
c14722.graph_c0	gi|326894636|gb|JI408439.1|	38.46	26	16	0	110	33	509	586	1.5	25.4
c14724.graph_c0	gi|326893087|gb|JI406890.1|	60	15	6	0	166	210	336	380	1.6	26.3
c14730.graph_c0	gi|326894487|gb|JI408290.1|	44.44	27	15	0	117	197	1490	1410	0.019	31.8
c14737.graph_c0	gi|326888722|gb|JI402525.1|	61.11	18	7	0	144	91	300	247	2	26.7
c14738.graph_c0	gi|326896362|gb|JI410165.1|	35	40	26	0	304	185	202	83	0.26	29.5
c14739.graph_c0	gi|326891148|gb|JI404951.1|	36.67	30	19	0	26	115	344	255	1.1	25.8
c14747.graph_c0	gi|326889150|gb|JI402953.1|	43.48	23	13	0	96	28	227	159	1.5	25.4
c14755.graph_c0	gi|326893580|gb|JI407383.1|	57.89	19	8	0	211	267	301	245	0.41	28.6
c14758.graph_c0	gi|326893732|gb|JI407535.1|	36.17	47	30	0	48	188	1606	1466	0.042	31
c14768.graph_c0	gi|326894786|gb|JI408589.1|	40	30	18	0	27	116	216	305	0.019	32.2
c14776.graph_c0	gi|326895882|gb|JI409685.1|	62.5	72	27	0	54	269	814	599	1e-19	89.2
c14777.graph_c0	gi|326892460|gb|JI406263.1|	64.29	14	5	0	83	42	159	118	0.23	29
c14781.graph_c0	gi|326890902|gb|JI404705.1|	75	48	12	0	139	282	3	146	4e-20	91.2
c14784.graph_c0	gi|326897130|gb|JI410933.1|	41.38	29	17	0	209	295	87	1	0.11	30.4
c14785.graph_c0	gi|326894851|gb|JI408654.1|	44.44	18	10	0	94	147	52	105	0.72	27.2
c14788.graph_c0	gi|326894364|gb|JI408167.1|	83	100	17	0	377	78	552	253	4e-57	214
c14794.graph_c0	gi|326893281|gb|JI407084.1|	50	18	9	0	109	162	254	307	0.13	24.9
c14797.graph_c0	gi|326889717|gb|JI403520.1|	28.26	46	33	0	78	215	287	150	0.31	28.1
c14798.graph_c0	gi|326892156|gb|JI405959.1|	57.89	19	8	0	159	103	570	514	0.75	27.2
c1480.graph_c0	gi|326889055|gb|JI402858.1|	72.73	11	3	0	66	34	121	153	4.2	24
c14800.graph_c0	gi|326895113|gb|JI408916.1|	41.38	29	17	0	28	114	229	315	0.058	30.4
c14801.graph_c0	gi|326895695|gb|JI409498.1|	32.56	43	29	0	121	249	82	210	0.004	35.5
c14819.graph_c0	gi|326888853|gb|JI402656.1|	41.86	43	25	0	32	160	352	224	3e-09	54.6
c14820.graph_c0	gi|326887544|gb|JI401347.1|	34.38	32	21	0	36	131	159	64	0.26	28.1
c14821.graph_c0	gi|326893113|gb|JI406916.1|	33.96	53	35	0	69	227	221	63	0.73	27.2
c14822.graph_c0	gi|326888557|gb|JI402360.1|	45.45	33	18	0	1	99	120	22	1e-05	43.7
c14827.graph_c0	gi|326894889|gb|JI408692.1|	46.15	26	14	0	249	172	289	212	0.089	29.9
c14831.graph_c0	gi|326889903|gb|JI403706.1|	52	25	12	0	146	72	136	62	0.068	29.9
c14844.graph_c0	gi|326891757|gb|JI405560.1|	47.62	21	11	0	30	92	479	541	0.045	30.4
c1485.graph_c0	gi|326894759|gb|JI408562.1|	54.55	22	10	0	77	12	606	671	0.12	29.5
c14852.graph_c0	gi|326892553|gb|JI406356.1|	48.39	31	16	0	36	128	111	19	0.25	28.6
c14853.graph_c0	gi|326889965|gb|JI403768.1|	64.71	17	6	0	222	172	62	12	1.2	26.3
c14856.graph_c0	gi|326888021|gb|JI401824.1|	34.48	29	19	0	149	63	78	164	0.36	27.6
c14859.graph_c0	gi|326897068|gb|JI410871.1|	72.9	107	29	0	323	3	1063	743	4e-47	181
c14860.graph_c0	gi|326892769|gb|JI406572.1|	34.78	23	15	0	71	3	375	307	1.6	25.4
c14864.graph_c0	gi|326887646|gb|JI401449.1|	52.63	19	9	0	67	11	1	57	0.14	29.5
c14874.graph_c0	gi|326895322|gb|JI409125.1|	42.86	28	16	0	181	98	134	217	0.31	27.6
c14876.graph_c0	gi|326894803|gb|JI408606.1|	67.42	89	29	0	276	10	471	205	5e-44	170
c14879.graph_c0	gi|326895754|gb|JI409557.1|	57.14	21	9	0	174	112	94	32	0.071	29.9
c14880.graph_c0	gi|326888607|gb|JI402410.1|	42.86	21	12	0	265	327	423	361	0.68	27.6
c14883.graph_c0	gi|326891173|gb|JI404976.1|	40.62	32	19	0	87	182	116	211	0.17	29.9
c14897.graph_c0	gi|326895683|gb|JI409486.1|	38.46	26	16	0	108	185	240	163	0.26	28.1
c14899.graph_c0	gi|326891069|gb|JI404872.1|	57.89	19	8	0	237	181	164	108	0.22	29.9
c14900.graph_c0	gi|326892954|gb|JI406757.1|	54.17	24	11	0	185	114	340	411	0.11	30.4
c14903.graph_c0	gi|326895749|gb|JI409552.1|	66.67	18	6	0	237	290	143	90	0.17	29.5
c14906.graph_c0	gi|326894876|gb|JI408679.1|	40.54	37	22	0	192	82	265	155	0.03	31.3
c14910.graph_c0	gi|326895872|gb|JI409675.1|	88.68	53	6	0	1	159	999	1157	2e-27	114
c14918.graph_c0	gi|326890832|gb|JI404635.1|	36	25	16	0	291	365	422	496	0.83	27.6
c14919.graph_c0	gi|326896336|gb|JI410139.1|	40	35	21	0	125	229	227	123	0.52	27.2
c14929.graph_c0	gi|326890918|gb|JI404721.1|	36	25	16	0	223	149	119	193	0.92	26.3
c1493.graph_c0	gi|326895816|gb|JI409619.1|	61.11	108	42	0	265	588	316	639	1e-73	160
c14930.graph_c0	gi|326889822|gb|JI403625.1|	60.87	23	9	0	2	70	71	3	5e-05	40.5
c14932.graph_c0	gi|326894493|gb|JI408296.1|	50	18	9	0	106	159	441	494	0.27	29.5
c14934.graph_c0	gi|326893637|gb|JI407440.1|	40	20	12	0	141	200	109	168	0.16	28.6
c14940.graph_c0	gi|326886863|gb|JI400666.1|	88.89	9	1	0	283	309	39	65	0.021	26.7
c14954.graph_c0	gi|326889686|gb|JI403489.1|	36.36	22	14	0	71	6	126	61	1.5	25.4
c14965.graph_c0	gi|326897300|gb|JI411103.1|	39.29	28	17	0	145	228	176	93	0.55	27.2
c14966.graph_c0	gi|326889144|gb|JI402947.1|	39.29	28	17	0	193	110	227	310	1.1	25.6
c14967.graph_c0	gi|326895953|gb|JI409756.1|	47.92	48	25	0	190	47	198	55	4e-12	63.8
c14972.graph_c0	gi|326894737|gb|JI408540.1|	28.95	38	27	0	180	293	230	117	0.12	29.9
c14980.graph_c0	gi|326890685|gb|JI404488.1|	28.89	45	32	0	199	65	397	263	0.34	28.1
c14985.graph_c0	gi|326886537|gb|JI400340.1|	38.71	31	19	0	262	170	4	96	0.29	29
c14988.graph_c0	gi|326895266|gb|JI409069.1|	39.13	23	14	0	340	272	6	74	0.26	22.6
c1499.graph_c0	gi|326888884|gb|JI402687.1|	69.23	13	4	0	227	265	178	140	0.17	29.5
c150.graph_c0	gi|326888540|gb|JI402343.1|	50	20	10	0	101	42	58	117	0.49	27.6
c15010.graph_c0	gi|326891320|gb|JI405123.1|	45.45	22	12	0	30	95	157	222	1.3	25.8
c15012.graph_c0	gi|326894355|gb|JI408158.1|	72.73	11	3	0	125	157	395	363	0.84	26.7
c15013.graph_c0	gi|326893600|gb|JI407403.1|	48.28	29	15	0	372	286	12	98	0.094	30.9
c15023.graph_c0	gi|326892425|gb|JI406228.1|	37.93	29	18	0	106	20	54	140	0.18	28.6
c15034.graph_c0	gi|326896512|gb|JI410315.1|	41.94	31	18	0	251	159	93	185	0.018	32.7
c15038.graph_c0	gi|326892936|gb|JI406739.1|	73.75	80	21	0	244	5	85	324	1e-32	132
c15039.graph_c0	gi|326895737|gb|JI409540.1|	45.45	22	12	0	97	162	1253	1188	0.26	28.6
c15044.graph_c0	gi|326897567|gb|JI411370.1|	45.83	24	13	0	257	186	161	232	0.25	28.6
c1505.graph_c0	gi|326895188|gb|JI408991.1|	46.15	26	14	0	358	281	283	206	0.76	27.6
c15050.graph_c0	gi|326897606|gb|JI411409.1|	52.38	21	10	0	50	112	155	217	0.5	28.1
c15051.graph_c0	gi|326891825|gb|JI405628.1|	42.86	28	16	0	39	122	186	103	0.056	31.3
c15062.graph_c0	gi|326894390|gb|JI408193.1|	55.56	18	8	0	123	176	66	13	0.29	28.6
c15069.graph_c0	gi|326889761|gb|JI403564.1|	46.15	26	14	0	211	288	30	107	0.89	27.2
c15071.graph_c0	gi|326890651|gb|JI404454.1|	48	25	13	0	209	135	75	149	0.094	29.5
c15079.graph_c0	gi|326897173|gb|JI410976.1|	56.25	16	7	0	276	229	142	95	0.21	29
c15087.graph_c0	gi|326892910|gb|JI406713.1|	52.38	21	10	0	209	271	340	278	0.011	28.6
c15088.graph_c0	gi|326893105|gb|JI406908.1|	30	50	35	0	41	190	138	287	0.035	30.9
c1509.graph_c0	gi|326890185|gb|JI403988.1|	42.86	28	16	0	135	52	262	179	0.093	29.5
c15090.graph_c0	gi|326894007|gb|JI407810.1|	33.33	45	30	0	320	186	218	352	0.089	31.3
c15108.graph_c0	gi|326895453|gb|JI409256.1|	24.32	37	28	0	140	250	64	174	0.19	29.5
c15113.graph_c0	gi|326896587|gb|JI410390.1|	43.33	30	17	0	190	279	206	295	0.4	29
c15121.graph_c0	gi|326893185|gb|JI406988.1|	36.51	63	40	0	192	4	285	97	8e-21	67.5
c15123.graph_c0	gi|326886829|gb|JI400632.1|	39.13	23	14	0	241	173	79	147	0.16	29
c15125.graph_c0	gi|326888792|gb|JI402595.1|	46.15	26	14	0	336	413	200	277	0.42	29
c15139.graph_c0	gi|326889693|gb|JI403496.1|	31.71	41	28	0	223	101	93	215	0.5	27.2
c15147.graph_c0	gi|326895894|gb|JI409697.1|	50	14	7	0	193	152	383	342	3.3	24.4
c15149.graph_c0	gi|326890724|gb|JI404527.1|	52.94	17	8	0	274	224	160	110	0.37	28.1
c15151.graph_c0	gi|326897710|gb|JI411513.1|	36.59	41	26	0	15	137	7	129	0.0003	33.6
c15152.graph_c0	gi|326892137|gb|JI405940.1|	28.57	28	20	0	139	56	80	163	0.38	28.1
c15158.graph_c0	gi|326888282|gb|JI402085.1|	47.06	17	9	0	198	148	164	114	0.067	29.9
c15174.graph_c0	gi|326888710|gb|JI402513.1|	50	24	12	0	408	337	97	26	0.29	29.9
c15175.graph_c0	gi|326893070|gb|JI406873.1|	48	25	13	0	250	324	136	62	0.9	27.2
c15177.graph_c0	gi|326895301|gb|JI409104.1|	47.22	36	19	0	174	67	412	519	9e-13	45.7
c15180.graph_c0	gi|326887896|gb|JI401699.1|	33.33	33	22	0	7	105	132	34	0.74	26.7
c15181.graph_c0	gi|326893156|gb|JI406959.1|	40.62	32	19	0	191	96	5	100	0.012	32.7
c15184.graph_c0	gi|326896425|gb|JI410228.1|	56.52	23	10	0	216	284	80	148	1.4	27.2
c15189.graph_c0	gi|326894406|gb|JI408209.1|	36	25	16	0	247	173	135	209	0.12	29.9
c15191.graph_c0	gi|326887208|gb|JI401011.1|	42.11	57	33	0	266	436	190	20	6e-11	62.5
c15194.graph_c0	gi|326887660|gb|JI401463.1|	35.48	31	20	0	179	271	230	138	0.34	29
c152.graph_c0	gi|326886736|gb|JI400539.1|	55.56	18	8	0	255	202	140	193	0.35	28.1
c15207.graph_c0	gi|326894824|gb|JI408627.1|	30.77	39	27	0	63	179	118	2	0.99	26.3
c15208.graph_c0	gi|326887900|gb|JI401703.1|	56.25	16	7	0	67	20	84	131	0.24	28.1
c15221.graph_c0	gi|326892387|gb|JI406190.1|	50	20	10	0	179	120	282	341	0.51	27.2
c15232.graph_c0	gi|326892453|gb|JI406256.1|	39.39	33	20	0	109	11	322	420	0.013	33.1
c15238.graph_c0	gi|326886963|gb|JI400766.1|	36.36	22	14	0	70	5	9	74	0.02	24
c15244.graph_c0	gi|326894986|gb|JI408789.1|	44.44	18	10	0	189	242	93	146	1	26.7
c15250.graph_c0	gi|326893841|gb|JI407644.1|	71.43	14	4	0	99	58	288	247	0.87	26.3
c15254.graph_c0	gi|326896464|gb|JI410267.1|	29.69	64	45	0	209	18	193	2	0.002	36.8
c15261.graph_c0	gi|326887393|gb|JI401196.1|	42.86	21	12	0	96	34	66	4	0.012	24.8
c15268.graph_c0	gi|326895606|gb|JI409409.1|	34.78	23	15	0	150	82	462	394	0.29	28.1
c1527.graph_c0	gi|326897507|gb|JI411310.1|	42.86	21	12	0	77	139	71	133	0.34	27.6
c15271.graph_c0	gi|326890352|gb|JI404155.1|	58.82	17	7	0	85	135	234	284	0.18	29.9
c15277.graph_c0	gi|326896465|gb|JI410268.1|	37.93	29	18	0	123	37	114	28	0.23	29
c15283.graph_c0	gi|326886630|gb|JI400433.1|	75	16	4	0	152	199	216	263	0.055	30.9
c15288.graph_c0	gi|326886498|gb|JI400301.1|	29.41	51	36	0	154	306	222	70	0.23	29
c1529.graph_c0	gi|326892919|gb|JI406722.1|	82.35	68	12	0	3	206	439	236	1e-25	108
c15290.graph_c0	gi|326895921|gb|JI409724.1|	42.86	21	12	0	5	67	243	181	1.8	26.7
c15293.graph_c0	gi|326891676|gb|JI405479.1|	54.55	22	10	0	3	68	87	22	0.64	27.2
c15299.graph_c0	gi|326890311|gb|JI404114.1|	29.79	47	33	0	245	105	8	148	0.2	29
c15305.graph_c0	gi|326896873|gb|JI410676.1|	54.29	35	16	0	120	16	201	97	2e-06	46.9
c15308.graph_c0	gi|326894382|gb|JI408185.1|	40.91	22	13	0	239	174	202	137	0.42	27.6
c15309.graph_c0	gi|326895289|gb|JI409092.1|	62.5	32	12	0	48	143	41	136	8e-23	54.5
c1531.graph_c0	gi|326893344|gb|JI407147.1|	40	30	18	0	93	4	72	161	0.13	29
c15320.graph_c0	gi|326892143|gb|JI405946.1|	30.43	23	16	0	163	231	100	32	0.81	26.7
c15322.graph_c0	gi|326891361|gb|JI405164.1|	64.71	17	6	0	143	193	146	96	0.3	28.6
c15325.graph_c0	gi|326888293|gb|JI402096.1|	66.67	12	4	0	145	110	91	126	0.42	27.2
c15331.graph_c0	gi|326887294|gb|JI401097.1|	51.52	33	16	0	212	114	96	194	0.0008	36.3
c15334.graph_c0	gi|326894819|gb|JI408622.1|	50	18	9	0	167	114	161	214	0.44	27.2
c15335.graph_c0	gi|326889829|gb|JI403632.1|	36.67	30	19	0	6	95	111	22	0.3	28.1
c15339.graph_c0	gi|326890296|gb|JI404099.1|	48.28	29	15	0	98	184	254	168	0.001	36.8
c1534.graph_c0	gi|326893664|gb|JI407467.1|	39.39	33	20	0	193	95	82	180	0.078	29.9
c15347.graph_c0	gi|326898228|gb|JI412031.1|	64.71	17	6	0	167	117	120	170	0.18	28.6
c15354.graph_c0	gi|326895959|gb|JI409762.1|	41.38	29	17	0	89	175	152	238	0.25	28.6
c15355.graph_c0	gi|326890300|gb|JI404103.1|	52.63	19	9	0	222	278	257	201	0.91	27.2
c15360.graph_c0	gi|326890957|gb|JI404760.1|	44.44	18	10	0	26	79	163	110	1.6	25.4
c15365.graph_c0	gi|326891555|gb|JI405358.1|	40	25	15	0	207	133	205	131	1.3	26.3
c15381.graph_c0	gi|326891127|gb|JI404930.1|	91.67	12	1	0	41	6	104	139	0.37	29
c15384.graph_c0	gi|326893887|gb|JI407690.1|	47.83	23	12	0	90	158	250	318	0.12	29
c15387.graph_c0	gi|326896981|gb|JI410784.1|	47.06	17	9	0	229	179	217	167	0.36	28
c15393.graph_c0	gi|326892329|gb|JI406132.1|	50	24	12	0	427	356	386	457	1.5	27.2
c15396.graph_c0	gi|326895901|gb|JI409704.1|	52.94	51	24	0	266	114	161	9	8e-12	63.4
c15397.graph_c0	gi|326895872|gb|JI409675.1|	80	10	2	0	114	143	663	634	0.47	27.2
c1540.graph_c0	gi|326895249|gb|JI409052.1|	47.06	17	9	0	144	194	274	224	0.19	29.5
c15411.graph_c0	gi|326895171|gb|JI408974.1|	45	20	11	0	99	158	800	741	0.47	27.2
c15412.graph_c0	gi|326892343|gb|JI406146.1|	42.86	21	12	0	216	154	190	252	1.6	26.3
c15420.graph_c0	gi|326896173|gb|JI409976.1|	37.84	37	23	0	146	36	132	242	0.26	28.1
c15423.graph_c0	gi|326894617|gb|JI408420.1|	40	25	15	0	68	142	254	180	0.16	29
c15426.graph_c0	gi|326888815|gb|JI402618.1|	40	30	18	0	33	122	365	276	0.46	27.2
c15428.graph_c0	gi|326894071|gb|JI407874.1|	92.31	39	3	0	2	118	654	770	3e-20	92.3
c15433.graph_c0	gi|326892604|gb|JI406407.1|	50	18	9	0	74	127	127	74	0.26	28.6
c15447.graph_c0	gi|326895621|gb|JI409424.1|	38.46	26	16	0	187	110	246	323	1.1	25.8
c1545.graph_c0	gi|326895548|gb|JI409351.1|	52	25	12	0	144	70	91	165	0.033	31.3
c15450.graph_c0	gi|326895845|gb|JI409648.1|	37.84	37	23	0	268	158	304	194	0.032	31.8
c15451.graph_c0	gi|326894873|gb|JI408676.1|	36.36	22	14	0	160	95	179	114	2	25.8
c15455.graph_c0	gi|326895298|gb|JI409101.1|	50	20	10	0	39	98	140	199	1.6	26.3
c15464.graph_c0	gi|326891440|gb|JI405243.1|	29.27	41	29	0	7	129	218	340	0.2	29
c15466.graph_c0	gi|326893113|gb|JI406916.1|	33.33	36	24	0	8	115	365	258	0.39	28.1
c15467.graph_c0	gi|326892303|gb|JI406106.1|	37.25	51	32	0	238	86	474	322	0.002	35.9
c15469.graph_c0	gi|326895552|gb|JI409355.1|	34.09	44	29	0	202	333	302	171	0.42	28.6
c15475.graph_c0	gi|326893875|gb|JI407678.1|	52.94	17	8	0	20	70	150	200	0.72	27.2
c15481.graph_c0	gi|326897680|gb|JI411483.1|	40.54	37	22	0	227	117	86	196	0.011	33.1
c15484.graph_c0	gi|326893125|gb|JI406928.1|	43.59	39	22	0	296	180	151	267	0.02	33.1
c15486.graph_c0	gi|326891823|gb|JI405626.1|	40.91	22	13	0	66	131	350	415	0.16	24.9
c15487.graph_c0	gi|326898042|gb|JI411845.1|	59.18	49	20	0	424	278	169	23	2e-15	76.2
c15492.graph_c0	gi|326896014|gb|JI409817.1|	57.89	19	8	0	135	79	150	206	0.18	28.6
c15497.graph_c0	gi|326893440|gb|JI407243.1|	41.67	24	14	0	97	26	132	61	0.069	30.9
c15518.graph_c0	gi|326894938|gb|JI408741.1|	69.23	13	4	0	142	180	388	350	0.85	26.3
c15524.graph_c0	gi|326895295|gb|JI409098.1|	59.09	22	9	0	90	25	633	568	0.1	29.5
c15527.graph_c0	gi|326890080|gb|JI403883.1|	38.89	36	22	0	170	277	130	23	0.11	30.4
c15528.graph_c0	gi|326886761|gb|JI400564.1|	41.67	24	14	0	101	172	204	133	0.87	27.6
c1553.graph_c0	gi|326886635|gb|JI400438.1|	45.83	24	13	0	2	73	279	350	0.45	27.2
c15531.graph_c0	gi|326894950|gb|JI408753.1|	30	30	21	0	125	214	114	203	0.24	28.1
c15533.graph_c0	gi|326886514|gb|JI400317.1|	72.73	22	6	0	173	238	153	88	3e-07	36.3
c15534.graph_c0	gi|326894077|gb|JI407880.1|	42.31	26	15	0	436	359	899	976	0.3	29.5
c15536.graph_c0	gi|326894070|gb|JI407873.1|	41.67	24	14	0	134	63	207	278	0.56	27.2
c15540.graph_c0	gi|326893841|gb|JI407644.1|	43.33	30	17	0	89	178	681	592	0.033	31.3
c15545.graph_c0	gi|326890804|gb|JI404607.1|	48.15	27	14	0	196	276	132	52	0.061	30.9
c15546.graph_c0	gi|326897719|gb|JI411522.1|	69.23	13	4	0	135	173	125	87	4.3	24.4
c15547.graph_c0	gi|326891555|gb|JI405358.1|	48	25	13	0	643	569	496	422	0.039	33.1
c15548.graph_c0	gi|326888174|gb|JI401977.1|	52.17	23	11	0	436	504	287	219	0.44	29
c15552.graph_c0	gi|326892480|gb|JI406283.1|	36.67	30	19	0	155	66	833	744	0.45	27.6
c15560.graph_c0	gi|326895625|gb|JI409428.1|	55	20	9	0	230	289	199	140	0.47	28
c15562.graph_c0	gi|326893240|gb|JI407043.1|	50	10	5	0	125	154	325	296	0.24	28.6
c15564.graph_c0	gi|326887505|gb|JI401308.1|	50	16	8	0	358	311	50	97	0.71	28.6
c15566.graph_c0	gi|326897220|gb|JI411023.1|	42.11	19	11	0	10	66	82	26	0.21	28.6
c15568.graph_c0	gi|326897102|gb|JI410905.1|	40	30	18	0	192	103	434	345	0.37	28.1
c15569.graph_c0	gi|326895707|gb|JI409510.1|	57.14	14	6	0	73	32	85	44	0.65	26.7
c15573.graph_c0	gi|326889722|gb|JI403525.1|	60	15	6	0	124	168	142	98	0.27	28.6
c15587.graph_c0	gi|326892355|gb|JI406158.1|	75	12	3	0	16	51	265	230	0.24	28.1
c15593.graph_c0	gi|326895265|gb|JI409068.1|	44	25	14	0	53	127	95	21	0.55	27.2
c15600.graph_c0	gi|326895813|gb|JI409616.1|	40	40	24	0	82	201	767	886	0.017	33.1
c15601.graph_c0	gi|326895779|gb|JI409582.1|	26.32	38	28	0	213	100	188	301	2.5	25.4
c15605.graph_c0	gi|326894910|gb|JI408713.1|	27.91	43	31	0	312	184	480	608	0.038	31.8
c15607.graph_c0	gi|326891434|gb|JI405237.1|	34.04	47	31	0	283	143	371	231	0.13	29.9
c15611.graph_c0	gi|326892936|gb|JI406739.1|	43.14	51	29	0	5	157	514	666	1e-08	52.4
c15612.graph_c0	gi|326886632|gb|JI400435.1|	58.82	17	7	0	197	147	105	55	3e-05	31.4
c15616.graph_c0	gi|326892426|gb|JI406229.1|	50	20	10	0	234	175	203	144	0.65	27.6
c15625.graph_c0	gi|326896403|gb|JI410206.1|	40.91	22	13	0	115	180	4	69	0.013	33.1
c15635.graph_c0	gi|326894018|gb|JI407821.1|	57.14	14	6	0	155	196	317	276	0.94	26.3
c15638.graph_c0	gi|326898178|gb|JI411981.1|	48.15	27	14	0	126	206	165	85	0.0002	38.6
c15640.graph_c0	gi|326895448|gb|JI409251.1|	64.29	14	5	0	282	241	416	457	0.35	28.6
c15642.graph_c0	gi|326891086|gb|JI404889.1|	56.25	16	7	0	81	128	206	159	0.35	28.1
c15645.graph_c0	gi|326894096|gb|JI407899.1|	34.78	46	30	0	178	41	1465	1602	0.062	30.4
c15652.graph_c0	gi|326893422|gb|JI407225.1|	32	50	34	0	205	56	17	166	0.051	31.2
c15654.graph_c0	gi|326893784|gb|JI407587.1|	32.26	31	21	0	34	126	221	129	0.49	27.2
c15656.graph_c0	gi|326889064|gb|JI402867.1|	54.21	107	49	0	151	471	282	602	5e-48	143
c1566.graph_c0	gi|326891325|gb|JI405128.1|	45.83	24	13	0	64	135	231	160	0.6	28.1
c15661.graph_c0	gi|326893779|gb|JI407582.1|	33.33	39	26	0	206	90	282	166	0.095	29.9
c15666.graph_c0	gi|326895209|gb|JI409012.1|	55	20	9	0	158	217	157	216	0.34	28.6
c15667.graph_c0	gi|326898223|gb|JI412026.1|	45	20	11	0	130	71	129	188	0.085	30.4
c15684.graph_c0	gi|326888473|gb|JI402276.1|	61.11	18	7	0	457	404	45	98	0.22	29.9
c15686.graph_c0	gi|326889107|gb|JI402910.1|	28.57	49	35	0	227	81	254	108	0.37	28.1
c15688.graph_c0	gi|326894347|gb|JI408150.1|	45	20	11	0	275	334	165	106	0.38	29
c15691.graph_c0	gi|326897498|gb|JI411301.1|	57.14	21	9	0	164	102	93	31	0.012	27.6
c15700.graph_c0	gi|326892596|gb|JI406399.1|	48.57	35	18	0	145	41	320	424	3e-07	49.2
c15703.graph_c0	gi|326891541|gb|JI405344.1|	50	20	10	0	34	93	10	69	0.095	25.4
c15704.graph_c0	gi|326895264|gb|JI409067.1|	100	8	0	0	24	1	434	411	0.086	25.4
c15710.graph_c0	gi|326894415|gb|JI408218.1|	48	25	13	0	204	130	211	137	1.1	26.7
c15715.graph_c0	gi|326889613|gb|JI403416.1|	75	12	3	0	2	37	265	300	0.94	26.3
c15716.graph_c0	gi|326891308|gb|JI405111.1|	46.05	76	41	0	19	246	73	300	3e-19	88.6
c15719.graph_c0	gi|326894913|gb|JI408716.1|	63.64	77	28	0	3	233	142	372	4e-30	123
c15735.graph_c0	gi|326888532|gb|JI402335.1|	35.71	42	27	0	197	72	109	234	0.036	30.9
c15736.graph_c0	gi|326892765|gb|JI406568.1|	45.83	24	13	0	247	176	133	62	1.1	26.3
c15740.graph_c0	gi|326895598|gb|JI409401.1|	36.11	36	23	0	73	180	681	574	0.002	36
c15741.graph_c0	gi|326895628|gb|JI409431.1|	55.56	18	8	0	142	195	666	613	0.14	29.5
c15748.graph_c0	gi|326893253|gb|JI407056.1|	47.62	21	11	0	219	157	118	180	0.085	29.9
c15750.graph_c0	gi|326890753|gb|JI404556.1|	66.67	12	4	0	29	64	165	200	0.7	26.7
c15766.graph_c0	gi|326893927|gb|JI407730.1|	34.29	35	23	0	93	197	290	186	0.053	30.9
c15769.graph_c0	gi|326895247|gb|JI409050.1|	40	30	18	0	210	299	713	624	0.045	32.7
c15776.graph_c0	gi|326894585|gb|JI408388.1|	34.78	23	15	0	229	161	524	456	2.9	24.9
c15777.graph_c0	gi|326896655|gb|JI410458.1|	76.54	81	19	0	181	423	6	248	2e-39	156
c15782.graph_c0	gi|326894655|gb|JI408458.1|	36.36	55	35	0	285	121	55	219	9e-05	40.9
c15792.graph_c0	gi|326893124|gb|JI406927.1|	30	30	21	0	118	207	616	705	0.12	30.4
c15794.graph_c0	gi|326894668|gb|JI408471.1|	44.44	27	15	0	64	144	610	530	0.066	29.9
c15799.graph_c0	gi|326889076|gb|JI402879.1|	57.14	42	18	0	198	73	296	421	9e-10	56.5
c158.graph_c0	gi|326890911|gb|JI404714.1|	37.93	29	18	0	208	122	246	160	1.1	26.7
c15807.graph_c0	gi|326895342|gb|JI409145.1|	47.83	23	12	0	464	532	327	395	0.078	32.2
c15807.graph_c1	gi|326892429|gb|JI406232.1|	56.25	16	7	0	23	70	140	93	0.63	26.7
c15809.graph_c0	gi|326889774|gb|JI403577.1|	55	20	9	0	94	35	161	220	0.3	28.1
c15815.graph_c0	gi|326895367|gb|JI409170.1|	34.38	32	21	0	215	120	545	450	0.64	27.2
c15816.graph_c0	gi|326888775|gb|JI402578.1|	50	26	13	0	97	174	110	187	0.16	29
c15817.graph_c0	gi|326889831|gb|JI403634.1|	33.33	30	20	0	169	80	26	115	2.2	24.9
c15820.graph_c0	gi|326886893|gb|JI400696.1|	36	25	16	0	191	117	163	89	0.092	29.5
c15827.graph_c0	gi|326896153|gb|JI409956.1|	64.29	14	5	0	124	165	245	204	2	25.8
c1583.graph_c0	gi|326896519|gb|JI410322.1|	43.48	23	13	0	230	298	177	109	0.2	29.5
c15831.graph_c0	gi|326893663|gb|JI407466.1|	37.5	32	20	0	54	149	331	236	0.091	30.4
c15832.graph_c0	gi|326888727|gb|JI402530.1|	45.16	31	17	0	187	95	148	240	0.045	30.9
c15837.graph_c0	gi|326893189|gb|JI406992.1|	33.33	42	28	0	92	217	130	255	0.38	27.6
c15842.graph_c0	gi|326891219|gb|JI405022.1|	44.44	18	10	0	102	49	369	422	0.62	26.7
c15845.graph_c0	gi|326891975|gb|JI405778.1|	36.11	36	23	0	230	337	211	318	0.14	29.9
c15848.graph_c0	gi|326894374|gb|JI408177.1|	46.43	28	15	0	314	231	634	551	0.26	29
c15853.graph_c0	gi|326894866|gb|JI408669.1|	44.44	27	15	0	261	181	192	112	0.18	29.5
c15856.graph_c0	gi|326897600|gb|JI411403.1|	25	24	18	0	309	380	149	78	1.1	27.2
c15859.graph_c0	gi|326889229|gb|JI403032.1|	40	20	12	0	83	24	218	159	2.4	25.4
c15861.graph_c0	gi|326887454|gb|JI401257.1|	100	81	0	0	2	244	186	428	5e-49	187
c15863.graph_c0	gi|326894024|gb|JI407827.1|	32.61	46	31	0	193	56	283	146	0.26	28.6
c15865.graph_c0	gi|326889152|gb|JI402955.1|	43.48	23	13	0	125	57	299	231	0.23	29
c15871.graph_c0	gi|326887246|gb|JI401049.1|	48	25	13	0	204	130	43	117	0.026	32.2
c15874.graph_c0	gi|326889062|gb|JI402865.1|	64.71	17	6	0	281	331	152	202	0.29	29
c15896.graph_c0	gi|326887378|gb|JI401181.1|	41.94	31	18	0	91	183	259	167	0.19	29
c15900.graph_c0	gi|326896620|gb|JI410423.1|	42.42	33	19	0	183	281	145	47	0.92	27.6
c15907.graph_c0	gi|326892325|gb|JI406128.1|	40	25	15	0	125	51	309	235	0.34	27.6
c15908.graph_c0	gi|326887534|gb|JI401337.1|	52.63	19	9	0	46	102	61	5	0.46	27.2
c15910.graph_c0	gi|326898015|gb|JI411818.1|	33.33	36	24	0	40	147	170	277	0.78	27.6
c15911.graph_c0	gi|326896729|gb|JI410532.1|	30.56	36	25	0	200	93	66	173	0.6	28.6
c15912.graph_c0	gi|326889076|gb|JI402879.1|	56.82	44	19	0	229	98	296	427	4e-13	68.4
c15913.graph_c0	gi|326895935|gb|JI409738.1|	36.36	33	21	0	261	163	444	346	0.56	27.6
c15914.graph_c0	gi|326891274|gb|JI405077.1|	41.67	24	14	0	277	348	264	335	0.9	27.6
c15921.graph_c0	gi|326891596|gb|JI405399.1|	37.93	29	18	0	277	191	287	201	0.073	31.8
c15926.graph_c0	gi|326888668|gb|JI402471.1|	57.89	19	8	0	254	198	136	192	0.46	27.6
c15927.graph_c0	gi|326893245|gb|JI407048.1|	45	20	11	0	8	67	262	203	0.055	30.9
c15929.graph_c0	gi|326887472|gb|JI401275.1|	45	20	11	0	134	75	303	244	1.6	25.4
c15931.graph_c0	gi|326893973|gb|JI407776.1|	53.33	15	7	0	90	134	461	505	0.05	30.4
c15939.graph_c0	gi|326890529|gb|JI404332.1|	83.33	12	2	0	9	44	297	262	0.34	27.6
c1594.graph_c0	gi|326897170|gb|JI410973.1|	66.67	12	4	0	173	208	104	69	1.7	25.4
c15941.graph_c0	gi|326889386|gb|JI403189.1|	37.04	27	17	0	292	212	113	193	0.062	24.4
c15945.graph_c0	gi|326893834|gb|JI407637.1|	33.33	48	32	0	6	149	15	158	0.036	30.9
c15951.graph_c0	gi|326888132|gb|JI401935.1|	47.06	34	18	0	148	47	85	186	8e-05	40
c15954.graph_c0	gi|326887430|gb|JI401233.1|	43.48	23	13	0	95	27	141	73	0.072	30.4
c1596.graph_c0	gi|326895894|gb|JI409697.1|	39.29	28	17	0	239	156	443	360	2.6	26.3
c15961.graph_c0	gi|326894432|gb|JI408235.1|	50.88	57	28	0	171	1	5	175	4e-15	74
c15963.graph_c0	gi|326895067|gb|JI408870.1|	36.36	22	14	0	99	34	319	254	0.23	28.1
c15971.graph_c0	gi|326888427|gb|JI402230.1|	38.71	31	19	0	29	121	173	81	0.9	26.3
c15972.graph_c0	gi|326892720|gb|JI406523.1|	64.29	14	5	0	119	160	76	35	0.39	28.4
c1598.graph_c0	gi|326897206|gb|JI411009.1|	50	22	11	0	74	9	77	12	0.085	29.5
c16008.graph_c0	gi|326895412|gb|JI409215.1|	30.3	33	23	0	654	752	125	27	0.83	29
c16013.graph_c0	gi|326892067|gb|JI405870.1|	34.29	35	23	0	261	157	154	50	0.45	28.1
c16014.graph_c0	gi|326889824|gb|JI403627.1|	55.56	18	8	0	201	148	926	979	0.32	23.1
c16020.graph_c0	gi|326896040|gb|JI409843.1|	38.46	26	16	0	94	17	240	317	0.35	27.6
c16023.graph_c0	gi|326895326|gb|JI409129.1|	30	40	28	0	174	55	100	219	0.059	30.9
c16036.graph_c0	gi|326895143|gb|JI408946.1|	48	25	13	0	113	187	545	471	0.56	26.7
c16037.graph_c0	gi|326894766|gb|JI408569.1|	34.38	32	21	0	7	102	285	380	0.19	29
c1604.graph_c0	gi|326893243|gb|JI407046.1|	38.46	26	16	0	65	142	182	105	0.12	29.9
c16041.graph_c0	gi|326895159|gb|JI408962.1|	46.67	15	8	0	96	52	640	684	0.25	28.6
c16042.graph_c0	gi|326895529|gb|JI409332.1|	47.37	19	10	0	196	252	334	278	0.45	28.1
c16043.graph_c0	gi|326898303|gb|JI412106.1|	41.18	34	20	0	145	246	129	230	0.064	30.9
c16061.graph_c0	gi|326896271|gb|JI410074.1|	34.29	35	23	0	155	51	153	49	0.44	27.6
c16064.graph_c0	gi|326898137|gb|JI411940.1|	38.67	75	46	0	227	451	2	226	2e-12	66.6
c16073.graph_c0	gi|326887960|gb|JI401763.1|	55.56	18	8	0	29	82	12	65	1.2	26.3
c1608.graph_c0	gi|326892494|gb|JI406297.1|	38.46	26	16	0	152	229	115	38	0.42	27.6
c16081.graph_c0	gi|326892617|gb|JI406420.1|	47.62	21	11	0	168	106	1061	999	0.18	29.5
c16083.graph_c0	gi|326895809|gb|JI409612.1|	54.17	24	11	0	147	76	121	50	0.29	28.6
c16085.graph_c0	gi|326887489|gb|JI401292.1|	62.5	16	6	0	75	122	169	216	1.3	25.8
c16089.graph_c0	gi|326889212|gb|JI403015.1|	35.48	31	20	0	44	136	233	141	0.2	29
c16090.graph_c0	gi|326898243|gb|JI412046.1|	45.45	22	12	0	318	253	107	172	1.1	27.6
c16091.graph_c0	gi|326891244|gb|JI405047.1|	41.67	24	14	0	102	173	108	179	0.74	26.7
c16093.graph_c0	gi|326887078|gb|JI400881.1|	29.73	37	26	0	44	154	25	135	0.11	29.5
c16096.graph_c0	gi|326890507|gb|JI404310.1|	42.86	28	16	0	49	132	146	63	0.41	28.1
c16100.graph_c0	gi|326893582|gb|JI407385.1|	43.33	30	17	0	170	259	296	207	0.87	27.6
c1611.graph_c0	gi|326898278|gb|JI412081.1|	48.28	29	15	0	113	27	179	93	0.001	35.4
c16114.graph_c0	gi|326892326|gb|JI406129.1|	58.33	84	35	0	2	253	180	431	7e-32	130
c16119.graph_c0	gi|326888822|gb|JI402625.1|	41.67	24	14	0	383	312	175	104	0.42	29
c16121.graph_c0	gi|326890320|gb|JI404123.1|	38.24	34	21	0	310	209	410	309	0.7	29
c16123.graph_c0	gi|326895089|gb|JI408892.1|	90	10	1	0	37	8	295	324	2.5	25.8
c16128.graph_c0	gi|326898263|gb|JI412066.1|	26.79	56	41	0	102	269	203	36	0.003	35.3
c16133.graph_c0	gi|326896176|gb|JI409979.1|	100	8	0	0	1	24	198	221	0.003	24.9
c16138.graph_c0	gi|326887518|gb|JI401321.1|	35.29	34	22	0	345	244	153	52	0.33	29
c16139.graph_c0	gi|326891207|gb|JI405010.1|	37.14	35	22	0	130	26	266	162	0.19	29
c16143.graph_c0	gi|326889259|gb|JI403062.1|	62.5	16	6	0	235	188	23	70	0.21	29
c16144.graph_c0	gi|326894884|gb|JI408687.1|	26.47	34	25	0	179	280	658	759	0.069	25.8
c16152.graph_c0	gi|326887943|gb|JI401746.1|	75	32	8	0	284	379	48	143	2e-14	57.9
c16158.graph_c0	gi|326886643|gb|JI400446.1|	47.83	23	12	0	177	109	87	155	0.46	27.2
c16166.graph_c0	gi|326887674|gb|JI401477.1|	40	25	15	0	126	52	51	125	0.4	28.1
c16168.graph_c0	gi|326896947|gb|JI410750.1|	36.36	33	21	0	98	196	117	215	0.002	34.9
c16169.graph_c0	gi|326893806|gb|JI407609.1|	55.56	54	24	0	66	227	196	357	1e-13	69.3
c1617.graph_c0	gi|326887626|gb|JI401429.1|	41.38	29	17	0	118	204	111	197	0.46	27.2
c16171.graph_c0	gi|326896160|gb|JI409963.1|	42.86	28	16	0	151	234	104	21	0.77	26.7
c16178.graph_c0	gi|326894929|gb|JI408732.1|	40.74	27	16	0	106	26	164	84	0.99	26.3
c16179.graph_c0	gi|326887645|gb|JI401448.1|	50	18	9	0	151	204	188	241	0.12	29
c16182.graph_c0	gi|326897206|gb|JI411009.1|	50	18	9	0	208	155	719	666	0.62	26.7
c16188.graph_c0	gi|326889845|gb|JI403648.1|	77.78	9	2	0	118	144	134	160	0.3	29.5
c16189.graph_c0	gi|326895157|gb|JI408960.1|	81.69	71	13	0	3	215	265	477	5e-34	137
c16198.graph_c0	gi|326893296|gb|JI407099.1|	35.71	56	36	0	3	170	332	165	3e-05	41
c162.graph_c0	gi|326891491|gb|JI405294.1|	50	24	12	0	279	350	247	318	1.2	27.2
c16200.graph_c0	gi|326889164|gb|JI402967.1|	54.55	11	5	0	51	83	147	115	0.05	24
c16201.graph_c0	gi|326895061|gb|JI408864.1|	36.84	38	24	0	199	86	233	120	0.098	29.9
c16206.graph_c0	gi|326892920|gb|JI406723.1|	59.09	22	9	0	68	3	117	182	0.067	30.9
c16209.graph_c0	gi|326889712|gb|JI403515.1|	31.58	38	26	0	323	210	181	68	0.2	29.5
c16225.graph_c0	gi|326894849|gb|JI408652.1|	52.63	19	9	0	48	104	322	266	2.4	25.4
c16231.graph_c0	gi|326893095|gb|JI406898.1|	34.38	32	21	0	148	53	133	38	0.19	28.6
c16234.graph_c0	gi|326893814|gb|JI407617.1|	60	15	6	0	62	106	886	842	1.6	25.4
c16237.graph_c0	gi|326895831|gb|JI409634.1|	52.38	21	10	0	104	42	194	132	0.019	31.8
c16238.graph_c0	gi|326895229|gb|JI409032.1|	31.25	48	33	0	227	84	16	159	0.054	30.4
c16243.graph_c0	gi|326892219|gb|JI406022.1|	41.67	24	14	0	14	85	563	634	0.058	30.4
c16246.graph_c0	gi|326891170|gb|JI404973.1|	41.38	29	17	0	269	183	90	176	0.13	23.5
c16248.graph_c0	gi|326887075|gb|JI400878.1|	61.11	18	7	0	258	205	190	137	0.46	28.1
c16249.graph_c0	gi|326889387|gb|JI403190.1|	35.48	31	20	0	313	221	37	129	0.049	25.4
c16256.graph_c0	gi|326895315|gb|JI409118.1|	60	15	6	0	258	302	2025	2069	0.58	27.6
c16258.graph_c0	gi|326889076|gb|JI402879.1|	55.81	43	19	0	472	600	296	424	1e-18	61.1
c16261.graph_c0	gi|326892394|gb|JI406197.1|	50	22	11	0	45	110	660	595	0.055	30.9
c1627.graph_c0	gi|326897398|gb|JI411201.1|	41.18	17	10	0	177	227	162	212	1.6	25.8
c16272.graph_c0	gi|326888318|gb|JI402121.1|	44	25	14	0	178	104	90	16	2.7	24.9
c16287.graph_c0	gi|326887880|gb|JI401683.1|	45.83	24	13	0	147	218	278	207	0.49	27.2
c16291.graph_c0	gi|326891421|gb|JI405224.1|	90	10	1	0	110	81	72	43	0.36	28.1
c16296.graph_c0	gi|326897825|gb|JI411628.1|	50	24	12	0	347	276	123	52	0.27	29
c16297.graph_c0	gi|326895766|gb|JI409569.1|	82.93	41	7	0	125	3	807	685	1e-18	85.3
c16298.graph_c0	gi|326893857|gb|JI407660.1|	53.33	15	7	0	177	221	1114	1158	2.6	25.8
c16300.graph_c0	gi|326897568|gb|JI411371.1|	44.83	29	16	0	105	191	147	233	0.15	29.9
c16303.graph_c0	gi|326897824|gb|JI411627.1|	40.91	22	13	0	10	75	232	167	0.22	28.6
c16305.graph_c0	gi|326892933|gb|JI406736.1|	46.67	30	16	0	1	90	187	98	0.39	27.6
c16306.graph_c0	gi|326896255|gb|JI410058.1|	40	25	15	0	63	137	512	438	0.16	29.5
c1631.graph_c0	gi|326893621|gb|JI407424.1|	48.39	31	16	0	116	24	157	65	0.097	29.5
c16315.graph_c0	gi|326894813|gb|JI408616.1|	28.85	52	37	0	184	29	96	251	0.082	30.9
c16321.graph_c0	gi|326888167|gb|JI401970.1|	53.57	28	13	0	88	171	96	13	0.0006	38.2
c16322.graph_c0	gi|326894544|gb|JI408347.1|	29.17	48	34	0	132	275	377	520	0.01	26.3
c16326.graph_c0	gi|326893783|gb|JI407586.1|	50	18	9	0	166	113	1	54	0.57	27.6
c16327.graph_c0	gi|326891054|gb|JI404857.1|	40.62	32	19	0	43	138	211	306	0.28	28.6
c16328.graph_c0	gi|326889862|gb|JI403665.1|	38.46	26	16	0	26	103	596	519	0.15	29
c16329.graph_c0	gi|326895727|gb|JI409530.1|	40.91	22	13	0	64	129	77	12	1.1	27.2
c1633.graph_c0	gi|326892701|gb|JI406504.1|	66.67	48	16	0	205	62	163	306	4e-21	93.6
c16339.graph_c0	gi|326887067|gb|JI400870.1|	31.25	32	22	0	121	26	262	167	0.075	30.4
c16346.graph_c0	gi|326891856|gb|JI405659.1|	44.83	29	16	0	133	219	194	280	0.72	26.7
c16359.graph_c0	gi|326895331|gb|JI409134.1|	40.74	27	16	0	118	38	90	10	0.31	27.6
c1636.graph_c0	gi|326896661|gb|JI410464.1|	33.33	30	20	0	163	74	192	103	0.11	30.4
c16369.graph_c0	gi|326894566|gb|JI408369.1|	26.09	46	34	0	236	99	156	19	0.65	27.6
c16372.graph_c0	gi|326897196|gb|JI410999.1|	33.33	24	16	0	209	138	106	35	0.95	26.7
c16374.graph_c0	gi|326889133|gb|JI402936.1|	42.86	35	20	0	240	136	248	352	0.0002	38.5
c16377.graph_c0	gi|326896005|gb|JI409808.1|	36.36	22	14	0	136	71	516	451	2.2	24.9
c16378.graph_c0	gi|326894906|gb|JI408709.1|	47.62	21	11	0	76	138	404	342	0.28	28.1
c16380.graph_c0	gi|326889280|gb|JI403083.1|	32.26	31	21	0	95	187	214	122	0.12	29
c16381.graph_c0	gi|326889895|gb|JI403698.1|	45	20	11	0	126	185	293	234	0.3	27.6
c16382.graph_c0	gi|326894838|gb|JI408641.1|	50	16	8	0	346	393	496	543	0.71	24.9
c16388.graph_c0	gi|326888277|gb|JI402080.1|	44.12	34	19	0	186	85	109	8	0.18	28.6
c16403.graph_c0	gi|326888316|gb|JI402119.1|	53.33	30	14	0	13	102	168	79	0.019	32.8
c16407.graph_c0	gi|326895441|gb|JI409244.1|	66.67	15	5	0	110	66	176	132	0.43	28.1
c16408.graph_c0	gi|326891504|gb|JI405307.1|	50	22	11	0	115	50	406	471	4	24.4
c16415.graph_c0	gi|326897628|gb|JI411431.1|	49.06	53	27	0	21	179	347	189	2e-13	68.9
c16424.graph_c0	gi|326892733|gb|JI406536.1|	57.14	14	6	0	49	90	223	182	0.26	28.1
c16425.graph_c0	gi|326891006|gb|JI404809.1|	47.06	17	9	0	142	92	65	15	0.61	26.7
c16439.graph_c0	gi|326889363|gb|JI403166.1|	34.15	41	27	0	4	126	44	166	0.068	29.9
c16455.graph_c0	gi|326892135|gb|JI405938.1|	42.86	21	12	0	249	187	77	15	0.56	27.6
c16464.graph_c0	gi|326893999|gb|JI407802.1|	40	30	18	0	38	127	315	226	0.14	29
c16478.graph_c0	gi|326896322|gb|JI410125.1|	53.33	30	14	0	112	201	113	24	4e-05	40.5
c16483.graph_c0	gi|326898178|gb|JI411981.1|	58.06	62	26	0	187	2	188	3	1e-18	87.7
c16493.graph_c0	gi|326892999|gb|JI406802.1|	69.57	23	7	0	145	213	1	69	1e-12	49.6
c16497.graph_c0	gi|326891434|gb|JI405237.1|	44.83	29	16	0	643	729	265	351	0.039	33.1
c16505.graph_c0	gi|326892467|gb|JI406270.1|	58.33	12	5	0	222	187	748	783	0.67	26.7
c16508.graph_c0	gi|326892823|gb|JI406626.1|	32.35	34	23	0	162	61	247	146	0.17	28.6
c16509.graph_c0	gi|326890664|gb|JI404467.1|	36	25	16	0	137	211	60	134	0.052	30.9
c16513.graph_c0	gi|326890777|gb|JI404580.1|	59.09	22	9	0	21	86	423	358	0.001	36.8
c16518.graph_c0	gi|326888480|gb|JI402283.1|	58.49	106	44	0	3	320	67	384	3e-36	144
c16520.graph_c0	gi|326892326|gb|JI406129.1|	36.36	22	14	0	388	453	25	90	0.15	30.4
c16532.graph_c0	gi|326890680|gb|JI404483.1|	58.33	12	5	0	79	44	40	5	0.7	27.2
c16537.graph_c0	gi|326895333|gb|JI409136.1|	32.35	34	23	0	247	146	413	514	0.86	26.7
c16538.graph_c0	gi|326895479|gb|JI409282.1|	48.57	35	18	0	418	314	367	263	0.44	29
c16541.graph_c0	gi|326891859|gb|JI405662.1|	50	22	11	0	19	84	76	11	0.79	26.7
c16544.graph_c0	gi|326887349|gb|JI401152.1|	57.14	14	6	0	96	55	458	499	0.41	27.6
c16559.graph_c0	gi|326891550|gb|JI405353.1|	76.92	13	3	0	134	96	127	165	0.038	31.3
c1656.graph_c0	gi|326894995|gb|JI408798.1|	61.54	13	5	0	39	1	190	152	4.3	24
c16561.graph_c0	gi|326889605|gb|JI403408.1|	44.44	18	10	0	143	90	58	111	0.33	27.6
c16564.graph_c0	gi|326894337|gb|JI408140.1|	33.33	30	20	0	63	152	5	94	0.63	26.7
c16567.graph_c0	gi|326893367|gb|JI407170.1|	36.84	38	24	0	295	182	550	437	0.004	35
c16574.graph_c0	gi|326891378|gb|JI405181.1|	42.86	28	16	0	148	65	246	163	0.11	29.9
c16581.graph_c0	gi|326889594|gb|JI403397.1|	85.71	35	5	0	199	95	217	113	2e-18	85.8
c16582.graph_c0	gi|326893576|gb|JI407379.1|	40	25	15	0	89	15	409	483	0.51	27.2
c16587.graph_c0	gi|326889452|gb|JI403255.1|	35.56	45	29	0	89	223	218	352	0.057	30.4
c16590.graph_c0	gi|326897223|gb|JI411026.1|	66.67	15	5	0	452	496	156	112	0.013	34.1
c16591.graph_c0	gi|326897930|gb|JI411733.1|	31.82	44	30	0	152	21	211	342	0.29	28.1
c16592.graph_c0	gi|326891011|gb|JI404814.1|	70.97	31	9	0	96	4	74	166	9e-11	51
c16597.graph_c0	gi|326886816|gb|JI400619.1|	76.92	13	3	0	94	132	147	185	0.034	30.9
c16598.graph_c0	gi|326895846|gb|JI409649.1|	46.43	28	15	0	140	57	241	324	0.12	30.9
c16599.graph_c0	gi|326895477|gb|JI409280.1|	43.75	16	9	0	192	239	588	635	0.32	28.1
c16602.graph_c0	gi|326888296|gb|JI402099.1|	35.29	34	22	0	160	59	151	50	0.4	29
c16603.graph_c0	gi|326891402|gb|JI405205.1|	50	14	7	0	53	12	204	163	0.86	27.2
c16605.graph_c0	gi|326896581|gb|JI410384.1|	58.82	17	7	0	62	112	118	168	0.07	30.4
c16614.graph_c0	gi|326895439|gb|JI409242.1|	39.29	28	17	0	197	114	418	335	1	26.3
c16615.graph_c0	gi|326895264|gb|JI409067.1|	45.45	33	18	0	194	96	424	326	0.75	27.2
c16617.graph_c0	gi|326895312|gb|JI409115.1|	54.55	22	10	0	207	142	33	98	0.4	28.1
c16618.graph_c0	gi|326895504|gb|JI409307.1|	40.74	27	16	0	110	30	910	990	0.47	27.2
c16619.graph_c0	gi|326894716|gb|JI408519.1|	42.03	69	40	0	212	6	311	517	3e-16	79
c1662.graph_c0	gi|326895962|gb|JI409765.1|	64.71	17	6	0	115	65	8	58	0.51	27.2
c16625.graph_c0	gi|326896224|gb|JI410027.1|	56.25	16	7	0	60	13	155	202	0.22	28.1
c16629.graph_c0	gi|326887042|gb|JI400845.1|	40	25	15	0	141	215	79	153	1.2	25.8
c1664.graph_c0	gi|326893262|gb|JI407065.1|	44.44	18	10	0	183	130	366	313	0.095	24.9
c16642.graph_c0	gi|326895162|gb|JI408965.1|	41.18	34	20	0	161	60	343	444	0.021	32.2
c16656.graph_c0	gi|326894441|gb|JI408244.1|	54.55	22	10	0	128	193	128	63	2e-05	42.8
c16661.graph_c0	gi|326887894|gb|JI401697.1|	45	20	11	0	443	384	166	225	0.51	29
c16676.graph_c0	gi|326894565|gb|JI408368.1|	32.5	40	27	0	201	82	375	256	0.17	28.6
c16688.graph_c0	gi|326889901|gb|JI403704.1|	39.29	28	17	0	273	190	221	138	0.64	28.6
c1669.graph_c0	gi|326896693|gb|JI410496.1|	47.06	17	9	0	154	104	163	113	0.047	22.6
c16695.graph_c0	gi|326887536|gb|JI401339.1|	81.25	16	3	0	5	52	226	179	0.005	33.6
c167.graph_c0	gi|326888429|gb|JI402232.1|	44.83	29	16	0	115	29	231	317	0.61	27.2
c16701.graph_c0	gi|326898178|gb|JI411981.1|	56.45	62	27	0	147	332	188	3	2e-17	83.4
c16710.graph_c0	gi|326894897|gb|JI408700.1|	57.89	19	8	0	89	145	752	696	0.15	29
c16712.graph_c0	gi|326890112|gb|JI403915.1|	50	20	10	0	165	106	80	21	0.15	29
c16715.graph_c0	gi|326895457|gb|JI409260.1|	61.54	13	5	0	84	46	100	62	3.9	24
c16719.graph_c0	gi|326890736|gb|JI404539.1|	36.36	33	21	0	122	24	695	597	0.46	28.1
c16722.graph_c0	gi|326897820|gb|JI411623.1|	34.04	47	31	0	43	183	66	206	0.51	28.1
c16726.graph_c0	gi|326889337|gb|JI403140.1|	39.29	28	17	0	429	346	86	3	0.069	31.5
c16729.graph_c0	gi|326888081|gb|JI401884.1|	52.38	21	10	0	106	44	179	117	0.43	27.6
c16742.graph_c0	gi|326895759|gb|JI409562.1|	44.12	34	19	0	37	138	430	329	1.5	25.8
c16750.graph_c0	gi|326892595|gb|JI406398.1|	41.18	34	20	0	115	14	196	297	0.18	28.6
c16752.graph_c0	gi|326893740|gb|JI407543.1|	71.43	14	4	0	263	222	230	189	1.8	25.8
c16756.graph_c0	gi|326888437|gb|JI402240.1|	64.71	17	6	0	251	301	99	49	2.8	26.3
c16760.graph_c0	gi|326890289|gb|JI404092.1|	25	44	33	0	50	181	52	183	0.36	28.1
c16761.graph_c0	gi|326893229|gb|JI407032.1|	29.79	47	33	0	27	167	286	426	0.43	27.2
c16762.graph_c0	gi|326893864|gb|JI407667.1|	83.82	68	11	0	1	204	347	550	5e-33	133
c16764.graph_c0	gi|326894368|gb|JI408171.1|	50	16	8	0	224	177	161	114	1.3	26.3
c16767.graph_c0	gi|326893145|gb|JI406948.1|	61.11	18	7	0	151	204	70	123	0.11	29.5
c16772.graph_c0	gi|326890051|gb|JI403854.1|	29.55	44	31	0	244	113	369	500	0.22	28.6
c16775.graph_c0	gi|326890767|gb|JI404570.1|	41.67	36	21	0	14	121	212	105	0.038	31.3
c16778.graph_c0	gi|326891636|gb|JI405439.1|	45.45	22	12	0	287	352	75	10	1.1	27.6
c16783.graph_c0	gi|326890589|gb|JI404392.1|	36.67	30	19	0	112	23	156	67	0.004	34.1
c16784.graph_c0	gi|326888380|gb|JI402183.1|	37.5	32	20	0	261	356	302	397	0.63	22.6
c16790.graph_c0	gi|326891098|gb|JI404901.1|	35.48	31	20	0	121	213	3	95	0.24	28.1
c16798.graph_c0	gi|326887228|gb|JI401031.1|	64.29	14	5	0	160	119	182	141	0.6	27.2
c1680.graph_c0	gi|326895301|gb|JI409104.1|	45.45	22	12	0	188	123	1160	1225	0.61	27.2
c16801.graph_c0	gi|326893473|gb|JI407276.1|	75	76	19	0	343	116	160	387	5e-36	144
c16803.graph_c0	gi|326896499|gb|JI410302.1|	62.5	16	6	0	2	49	305	352	0.39	28.1
c16804.graph_c0	gi|326895416|gb|JI409219.1|	34.78	23	15	0	213	145	516	448	4.4	24.4
c16805.graph_c0	gi|326894000|gb|JI407803.1|	45.16	31	17	0	125	33	2	94	0.92	26.7
c16806.graph_c0	gi|326895414|gb|JI409217.1|	76.92	13	3	0	171	133	1331	1369	0.16	28.6
c16810.graph_c0	gi|326889714|gb|JI403517.1|	58.82	17	7	0	138	188	360	310	0.81	26.3
c16817.graph_c0	gi|326896149|gb|JI409952.1|	47.62	21	11	0	262	200	90	152	0.65	29
c16823.graph_c0	gi|326894604|gb|JI408407.1|	57.89	19	8	0	125	181	152	208	0.59	27.2
c16826.graph_c0	gi|326896178|gb|JI409981.1|	60	15	6	0	176	220	298	254	0.72	26.7
c16836.graph_c0	gi|326895705|gb|JI409508.1|	33.33	33	22	0	112	210	423	521	1.1	27.2
c16838.graph_c0	gi|326893805|gb|JI407608.1|	50	46	23	0	65	202	195	332	1e-13	68.8
c16841.graph_c0	gi|326890545|gb|JI404348.1|	71.43	14	4	0	98	57	93	52	0.21	29
c16842.graph_c0	gi|326888214|gb|JI402017.1|	40.62	32	19	0	204	109	308	213	0.92	26.7
c16849.graph_c0	gi|326890332|gb|JI404135.1|	47.62	21	11	0	179	117	252	314	1.6	26.3
c16855.graph_c0	gi|326892243|gb|JI406046.1|	42.31	26	15	0	25	102	244	167	0.23	29
c16865.graph_c0	gi|326895960|gb|JI409763.1|	22.73	44	34	0	201	332	237	106	1.2	27.2
c16866.graph_c0	gi|326892684|gb|JI406487.1|	61.54	13	5	0	44	82	277	239	0.74	27.2
c16868.graph_c0	gi|326890240|gb|JI404043.1|	47.37	19	10	0	182	126	90	34	0.32	28.6
c16869.graph_c0	gi|326896913|gb|JI410716.1|	57.14	14	6	0	183	224	109	150	1	26.3
c16872.graph_c0	gi|326895772|gb|JI409575.1|	60	50	20	0	51	200	4	153	2e-15	74.8
c16874.graph_c0	gi|326893604|gb|JI407407.1|	55.56	18	8	0	262	209	123	176	0.46	28.1
c16889.graph_c0	gi|326891482|gb|JI405285.1|	39.39	33	20	0	125	223	99	1	0.083	30.4
c16894.graph_c0	gi|326890690|gb|JI404493.1|	42.31	26	15	0	148	225	253	176	0.16	29.5
c16895.graph_c0	gi|326895476|gb|JI409279.1|	28.21	39	28	0	77	193	111	227	0.26	28.6
c1690.graph_c0	gi|326888910|gb|JI402713.1|	41.67	24	14	0	217	146	136	207	1.3	25.8
c16904.graph_c0	gi|326895118|gb|JI408921.1|	52.63	19	9	0	205	149	43	99	0.55	27.2
c16910.graph_c0	gi|326890363|gb|JI404166.1|	57.69	26	11	0	726	649	195	118	0.15	31.3
c16914.graph_c0	gi|326889168|gb|JI402971.1|	48.15	27	14	0	147	227	229	149	0.066	30.4
c16915.graph_c0	gi|326896234|gb|JI410037.1|	53.33	15	7	0	161	205	107	151	0.26	28.1
c16921.graph_c0	gi|326892102|gb|JI405905.1|	53.66	82	38	0	246	1	492	247	9e-30	122
c16921.graph_c1	gi|326891615|gb|JI405418.1|	55.56	45	20	0	1	135	386	252	1e-22	62
c16922.graph_c0	gi|326890580|gb|JI404383.1|	64.81	54	19	0	301	140	339	500	2e-21	95.9
c16924.graph_c0	gi|326890132|gb|JI403935.1|	56.25	16	7	0	77	30	176	223	3.9	24.4
c16928.graph_c0	gi|326894699|gb|JI408502.1|	81.08	74	14	0	1	222	377	598	4e-39	153
c16934.graph_c0	gi|326893523|gb|JI407326.1|	52.94	17	8	0	114	64	26	76	0.7	27.2
c16935.graph_c0	gi|326895763|gb|JI409566.1|	31.25	32	22	0	76	171	133	228	1.5	25.8
c16936.graph_c0	gi|326895808|gb|JI409611.1|	61.54	13	5	0	76	114	383	345	0.13	29
c16938.graph_c0	gi|326887995|gb|JI401798.1|	69.23	13	4	0	143	181	224	262	0.096	30.4
c16945.graph_c0	gi|326887233|gb|JI401036.1|	43.48	69	39	0	316	110	360	154	1e-14	73.5
c16946.graph_c0	gi|326898217|gb|JI412020.1|	36	25	16	0	131	205	22	96	0.48	27.6
c16949.graph_c0	gi|326892453|gb|JI406256.1|	39.47	38	23	0	255	368	216	103	0.72	28.1
c1696.graph_c0	gi|326886611|gb|JI400414.1|	33.93	56	37	0	1	168	40	207	0.0001	40
c16960.graph_c0	gi|326888533|gb|JI402336.1|	34.21	38	25	0	175	62	21	134	0.15	28.6
c16963.graph_c0	gi|326896494|gb|JI410297.1|	62.5	16	6	0	23	70	29	76	0.56	27.6
c16972.graph_c0	gi|326897599|gb|JI411402.1|	42.42	33	19	0	368	466	213	311	0.069	31.8
c16974.graph_c0	gi|326896687|gb|JI410490.1|	41.67	24	14	0	168	97	584	513	1.1	25.8
c16981.graph_c0	gi|326891943|gb|JI405746.1|	30	50	35	0	231	82	289	140	0.025	33.1
c16987.graph_c0	gi|326895132|gb|JI408935.1|	50	20	10	0	195	254	64	123	0.39	28.1
c16994.graph_c0	gi|326887626|gb|JI401429.1|	56.25	16	7	0	330	283	88	135	0.54	22.6
c16998.graph_c0	gi|326888914|gb|JI402717.1|	40.98	61	36	0	32	214	350	168	2e-09	55.2
c17000.graph_c0	gi|326893746|gb|JI407549.1|	78.57	14	3	0	456	415	236	195	1.5	27.6
c17001.graph_c0	gi|326894974|gb|JI408777.1|	52	25	12	0	386	312	270	196	0.013	33.6
c17006.graph_c0	gi|326897146|gb|JI410949.1|	26.83	41	30	0	155	33	189	67	0.63	27.6
c17007.graph_c0	gi|326893869|gb|JI407672.1|	42.86	63	36	0	256	68	327	515	2e-09	55.6
c17008.graph_c0	gi|326896882|gb|JI410685.1|	46.03	63	34	0	19	207	246	58	2e-15	75.3
c1701.graph_c0	gi|326892126|gb|JI405929.1|	41.67	24	14	0	93	164	147	76	0.48	28.1
c1701.graph_c1	gi|326890951|gb|JI404754.1|	63.16	19	7	0	54	110	56	112	0.014	32.2
c17015.graph_c0	gi|326886677|gb|JI400480.1|	40.62	32	19	0	107	202	338	243	0.13	29
c17029.graph_c0	gi|326894648|gb|JI408451.1|	40	25	15	0	91	165	282	356	0.34	27.6
c17039.graph_c0	gi|326894973|gb|JI408776.1|	52.38	21	10	0	186	248	492	430	1.2	26.7
c17040.graph_c0	gi|326890197|gb|JI404000.1|	56.25	16	7	0	88	41	134	181	0.79	26.3
c17046.graph_c0	gi|326890687|gb|JI404490.1|	35.71	28	18	0	216	133	66	149	0.16	29.5
c17049.graph_c0	gi|326890917|gb|JI404720.1|	36.67	30	19	0	3	92	165	254	0.28	28.6
c1706.graph_c0	gi|326895622|gb|JI409425.1|	60	15	6	0	175	219	342	298	0.001	35.9
c17066.graph_c0	gi|326897556|gb|JI411359.1|	23.08	39	30	0	63	179	130	14	0.014	24.9
c17067.graph_c0	gi|326886503|gb|JI400306.1|	53.85	26	12	0	283	206	159	236	0.083	30.4
c17077.graph_c0	gi|326894650|gb|JI408453.1|	46.43	28	15	0	144	61	565	648	0.042	30.9
c17079.graph_c0	gi|326887589|gb|JI401392.1|	60.98	41	16	0	97	219	91	213	1e-20	64.3
c17081.graph_c0	gi|326896565|gb|JI410368.1|	55	20	9	0	166	107	115	174	0.39	29
c17083.graph_c0	gi|326895111|gb|JI408914.1|	53.33	15	7	0	48	92	121	77	0.13	29
c17084.graph_c0	gi|326890589|gb|JI404392.1|	30	40	28	0	8	127	186	67	0.0009	37.3
c17088.graph_c0	gi|326891615|gb|JI405418.1|	64	50	18	0	152	3	209	60	1e-31	90.4
c17091.graph_c0	gi|326897258|gb|JI411061.1|	70.67	75	22	0	217	441	2	226	9e-38	150
c17092.graph_c0	gi|326892103|gb|JI405906.1|	47.37	19	10	0	143	87	777	833	0.04	31.8
c17093.graph_c0	gi|326895405|gb|JI409208.1|	44.44	18	10	0	215	162	182	129	1.3	26.7
c171.graph_c0	gi|326894698|gb|JI408501.1|	50	18	9	0	79	26	519	572	0.03	25.4
c17102.graph_c0	gi|326892766|gb|JI406569.1|	38.1	21	13	0	136	198	1182	1244	0.52	27.2
c17103.graph_c0	gi|326891634|gb|JI405437.1|	44.44	27	15	0	6	86	335	255	0.81	26.3
c17104.graph_c0	gi|326892933|gb|JI406736.1|	36.11	36	23	0	112	219	464	357	0.44	28.1
c17106.graph_c0	gi|326898245|gb|JI412048.1|	52.17	23	11	0	214	146	199	131	0.02	32.2
c17108.graph_c0	gi|326897784|gb|JI411587.1|	47.62	21	11	0	110	48	20	82	0.2	28.6
c17112.graph_c0	gi|326896881|gb|JI410684.1|	30.56	36	25	0	221	114	172	65	0.52	27.2
c17113.graph_c0	gi|326895689|gb|JI409492.1|	55	20	9	0	150	91	146	205	0.061	26.7
c17115.graph_c0	gi|326888467|gb|JI402270.1|	34.48	29	19	0	97	183	192	106	0.006	33.6
c17119.graph_c0	gi|326892771|gb|JI406574.1|	36.36	22	14	0	157	92	267	202	0.57	27.6
c17128.graph_c0	gi|326892926|gb|JI406729.1|	46.67	30	16	0	6	95	364	453	0.066	30
c17134.graph_c0	gi|326894957|gb|JI408760.1|	56.25	16	7	0	185	138	240	193	0.69	26.7
c17135.graph_c0	gi|326896055|gb|JI409858.1|	38.71	31	19	0	91	183	155	63	0.16	28.6
c17139.graph_c0	gi|326890105|gb|JI403908.1|	72.73	11	3	0	141	109	191	223	0.33	28.1
c17149.graph_c0	gi|326892676|gb|JI406479.1|	41.67	36	21	0	225	118	284	177	0.079	30.4
c17153.graph_c0	gi|326895440|gb|JI409243.1|	41.67	84	49	0	2	253	354	103	2e-17	82.6
c1716.graph_c0	gi|326894544|gb|JI408347.1|	37.93	29	18	0	104	18	278	364	0.16	28.6
c17162.graph_c0	gi|326897713|gb|JI411516.1|	45.45	22	12	0	330	265	141	206	0.65	28.6
c17165.graph_c0	gi|326895277|gb|JI409080.1|	30.3	66	46	0	227	424	575	772	3e-09	43.7
c17189.graph_c0	gi|326893105|gb|JI406908.1|	45.83	24	13	0	176	105	299	228	0.049	30.4
c17193.graph_c0	gi|326894890|gb|JI408693.1|	53.33	15	7	0	178	222	171	127	0.54	27.2
c17194.graph_c0	gi|326894988|gb|JI408791.1|	53.85	13	6	0	15	53	165	203	1.9	25.4
c17204.graph_c0	gi|326892678|gb|JI406481.1|	66.22	74	25	0	29	250	1	222	9e-30	123
c17209.graph_c0	gi|326897784|gb|JI411587.1|	48	25	13	0	81	7	240	314	0.31	29.5
c17219.graph_c0	gi|326886957|gb|JI400760.1|	47.62	21	11	0	157	95	118	56	0.15	29
c17223.graph_c0	gi|326892884|gb|JI406687.1|	70.69	58	17	0	209	36	993	820	4e-24	104
c17227.graph_c0	gi|326893670|gb|JI407473.1|	53.85	13	6	0	240	202	49	87	0.56	27.2
c17251.graph_c0	gi|326896016|gb|JI409819.1|	45.16	62	34	0	336	521	158	343	2e-26	82.6
c17271.graph_c0	gi|326895637|gb|JI409440.1|	60	70	28	0	249	40	218	9	4e-21	94.1
c17282.graph_c0	gi|326890943|gb|JI404746.1|	88.52	61	7	0	247	65	231	413	4e-33	133
c17284.graph_c0	gi|326897403|gb|JI411206.1|	31.25	48	33	0	168	311	33	176	0.62	27.6
c17297.graph_c0	gi|326892400|gb|JI406203.1|	72.73	11	3	0	162	194	195	227	0.95	26.7
c17299.graph_c0	gi|326897955|gb|JI411758.1|	32	50	34	0	16	165	46	195	0.012	28.1
c17301.graph_c0	gi|326893562|gb|JI407365.1|	41.67	24	14	0	209	138	354	425	0.29	28.6
c17305.graph_c0	gi|326893561|gb|JI407364.1|	40.62	32	19	0	107	202	278	183	0.053	30.9
c17316.graph_c0	gi|326898113|gb|JI411916.1|	40.74	27	16	0	104	184	172	252	1.5	25.4
c17319.graph_c0	gi|326890206|gb|JI404009.1|	72.73	11	3	0	9	41	138	170	1.6	25.4
c17322.graph_c0	gi|326895078|gb|JI408881.1|	41.03	39	23	0	76	192	152	36	0.015	34.1
c17325.graph_c0	gi|326897149|gb|JI410952.1|	42.11	19	11	0	172	228	157	213	0.0004	30.9
c17326.graph_c0	gi|326889629|gb|JI403432.1|	44	25	14	0	82	8	264	338	0.99	26.3
c17331.graph_c0	gi|326896846|gb|JI410649.1|	47.83	23	12	0	217	149	70	138	0.072	30.4
c17338.graph_c0	gi|326896611|gb|JI410414.1|	42.86	21	12	0	240	178	89	27	1.1	26.3
c17351.graph_c0	gi|326895974|gb|JI409777.1|	75.36	69	17	0	255	49	1	207	5e-33	133
c17355.graph_c0	gi|326893946|gb|JI407749.1|	36.59	41	26	0	54	176	244	122	0.066	29.9
c17359.graph_c0	gi|326893684|gb|JI407487.1|	31.43	105	72	0	57	371	552	238	6e-11	61.7
c1736.graph_c0	gi|326891202|gb|JI405005.1|	41.67	24	14	0	103	32	204	133	0.32	27.6
c17363.graph_c0	gi|326896977|gb|JI410780.1|	52.38	21	10	0	20	82	147	209	0.064	29.9
c17378.graph_c0	gi|326892705|gb|JI406508.1|	61.11	18	7	0	221	274	152	99	0.035	31.8
c17383.graph_c0	gi|326887313|gb|JI401116.1|	83.53	85	14	0	142	396	25	279	1e-44	173
c17385.graph_c0	gi|326896016|gb|JI409819.1|	30.3	33	23	0	144	46	143	241	0.084	30.4
c17392.graph_c0	gi|326892012|gb|JI405815.1|	43.48	23	13	0	128	196	261	329	1.1	25.8
c17393.graph_c0	gi|326889944|gb|JI403747.1|	52.38	21	10	0	265	327	262	324	0.16	30.4
c17394.graph_c0	gi|326893793|gb|JI407596.1|	40.62	32	19	0	70	165	242	147	0.036	30.9
c174.graph_c0	gi|326892933|gb|JI406736.1|	50	22	11	0	146	81	339	274	0.1	29.9
c174.graph_c1	gi|326895000|gb|JI408803.1|	61.11	18	7	0	136	83	1	54	0.32	28.1
c17408.graph_c0	gi|326895093|gb|JI408896.1|	61.11	18	7	0	193	246	390	443	0.88	27.2
c17419.graph_c0	gi|326892660|gb|JI406463.1|	62.5	16	6	0	232	185	645	598	0.22	28.6
c17430.graph_c0	gi|326892903|gb|JI406706.1|	51.85	27	13	0	111	191	116	36	0.033	30.9
c17432.graph_c0	gi|326896727|gb|JI410530.1|	62.5	16	6	0	202	249	341	294	0.11	29.9
c17433.graph_c0	gi|326895146|gb|JI408949.1|	43.62	94	53	0	282	1	665	946	7e-20	90.4
c17436.graph_c0	gi|326889165|gb|JI402968.1|	58.82	17	7	0	218	168	135	85	0.015	32.7
c17439.graph_c0	gi|326896296|gb|JI410099.1|	39.39	33	20	0	189	91	279	181	0.13	29
c17442.graph_c0	gi|326890387|gb|JI404190.1|	52	25	12	0	208	134	258	184	6e-07	35.9
c17454.graph_c0	gi|326896601|gb|JI410404.1|	47.06	17	9	0	183	133	74	24	0.51	27.6
c1746.graph_c0	gi|326897135|gb|JI410938.1|	41.67	24	14	0	185	256	114	185	0.012	24.6
c17462.graph_c0	gi|326888522|gb|JI402325.1|	40	20	12	0	71	130	105	164	0.49	27.2
c17464.graph_c0	gi|326895441|gb|JI409244.1|	37.5	32	20	0	139	44	168	73	0.015	32.2
c17475.graph_c0	gi|326888343|gb|JI402146.1|	50	18	9	0	23	76	65	12	1.9	25.8
c17475.graph_c1	gi|326892850|gb|JI406653.1|	38.24	34	21	0	197	96	364	263	1.2	26.3
c17476.graph_c0	gi|326895910|gb|JI409713.1|	53.33	15	7	0	132	176	251	207	0.36	28.6
c17477.graph_c0	gi|326892127|gb|JI405930.1|	35.14	37	24	0	118	8	70	180	0.062	30.4
c17482.graph_c0	gi|326895781|gb|JI409584.1|	37.5	48	30	0	320	177	302	159	9e-06	44.1
c17486.graph_c0	gi|326887105|gb|JI400908.1|	24.49	49	37	0	186	40	267	121	1.4	25.8
c17487.graph_c0	gi|326892767|gb|JI406570.1|	66.67	12	4	0	153	188	351	316	0.046	24
c17500.graph_c0	gi|326895141|gb|JI408944.1|	38.24	34	21	0	138	37	77	178	0.023	25.8
c17502.graph_c0	gi|326889653|gb|JI403456.1|	34.69	49	32	0	36	182	250	104	0.31	29.9
c17510.graph_c0	gi|326888844|gb|JI402647.1|	21.82	55	43	0	28	192	230	66	0.25	28.1
c17516.graph_c0	gi|326895210|gb|JI409013.1|	30.61	49	34	0	12	158	272	418	0.087	30.9
c17520.graph_c0	gi|326891136|gb|JI404939.1|	50	14	7	0	52	11	165	124	0.69	27.2
c17526.graph_c0	gi|326895777|gb|JI409580.1|	36.67	30	19	0	69	158	291	202	0.093	23.5
c17534.graph_c0	gi|326897463|gb|JI411266.1|	50	14	7	0	164	205	182	223	0.029	24
c17536.graph_c0	gi|326892188|gb|JI405991.1|	31.71	41	28	0	56	178	498	620	0.46	27.6
c17560.graph_c0	gi|326897088|gb|JI410891.1|	38.24	34	21	0	11	112	122	21	0.13	29
c17576.graph_c0	gi|326893830|gb|JI407633.1|	40.74	27	16	0	81	1	48	128	1.6	25.4
c17581.graph_c0	gi|326891290|gb|JI405093.1|	34.15	41	27	0	161	39	210	88	0.11	29.9
c17586.graph_c0	gi|326889781|gb|JI403584.1|	50	24	12	0	83	154	234	163	0.055	30.4
c17590.graph_c0	gi|326897903|gb|JI411706.1|	50	22	11	0	5	70	152	87	0.009	32.7
c17601.graph_c0	gi|326888639|gb|JI402442.1|	45.83	24	13	0	122	193	207	136	0.12	29
c17602.graph_c0	gi|326897797|gb|JI411600.1|	47.37	19	10	0	206	150	7	63	0.8	27.2
c17618.graph_c0	gi|326896507|gb|JI410310.1|	64.29	14	5	0	153	194	351	392	1.6	25.4
c17636.graph_c0	gi|326896415|gb|JI410218.1|	64.29	14	5	0	129	88	65	106	0.94	26.3
c17640.graph_c0	gi|326890336|gb|JI404139.1|	29.41	34	24	0	283	182	287	186	0.52	28.1
c17643.graph_c0	gi|326889302|gb|JI403105.1|	60	15	6	0	64	108	116	160	0.17	29.9
c17669.graph_c0	gi|326886695|gb|JI400498.1|	42.86	28	16	0	109	192	99	16	0.14	30.4
c17673.graph_c0	gi|326890190|gb|JI403993.1|	44.44	18	10	0	143	90	162	109	0.85	27.2
c17675.graph_c0	gi|326896350|gb|JI410153.1|	53.33	15	7	0	91	47	143	99	1.1	26.7
c17689.graph_c0	gi|326895046|gb|JI408849.1|	40	25	15	0	256	330	411	485	0.19	29.5
c17691.graph_c0	gi|326896762|gb|JI410565.1|	52.17	23	11	0	138	206	58	126	0.005	33.6
c17692.graph_c0	gi|326890948|gb|JI404751.1|	50	18	9	0	116	63	171	118	0.16	28.6
c17699.graph_c0	gi|326888500|gb|JI402303.1|	52.38	21	10	0	71	133	166	104	1.1	25.8
c17702.graph_c0	gi|326895440|gb|JI409243.1|	42.98	114	65	0	7	348	342	1	2e-22	99.4
c17703.graph_c0	gi|326893213|gb|JI407016.1|	40	20	12	0	2	61	194	253	0.099	29.9
c1771.graph_c0	gi|326893312|gb|JI407115.1|	41.18	34	20	0	48	149	594	695	0.007	34.1
c17715.graph_c0	gi|326886836|gb|JI400639.1|	98.41	63	1	0	189	1	452	264	3e-40	157
c17721.graph_c0	gi|326891183|gb|JI404986.1|	36.67	30	19	0	124	35	128	39	1.9	26.3
c17728.graph_c0	gi|326894539|gb|JI408342.1|	40	45	27	0	48	182	167	301	0.009	32.7
c17732.graph_c0	gi|326894110|gb|JI407913.1|	41.94	31	18	0	330	422	87	179	1.4	27.2
c1774.graph_c0	gi|326886526|gb|JI400329.1|	41.18	34	20	0	284	183	308	207	0.074	30.9
c17740.graph_c0	gi|326896999|gb|JI410802.1|	56.82	44	19	0	206	75	137	6	3e-12	64.3
c17754.graph_c0	gi|326893302|gb|JI407105.1|	45.45	44	24	0	1	132	321	452	0.0004	38.2
c17769.graph_c0	gi|326895862|gb|JI409665.1|	52.17	23	11	0	189	257	116	48	0.018	32.7
c17778.graph_c0	gi|326896061|gb|JI409864.1|	41.38	29	17	0	225	139	347	261	0.073	30.4
c17782.graph_c0	gi|326897611|gb|JI411414.1|	47.62	21	11	0	74	136	63	1	0.097	29.9
c17790.graph_c0	gi|326891674|gb|JI405477.1|	52.94	17	8	0	121	71	98	148	0.16	29
c178.graph_c0	gi|326896034|gb|JI409837.1|	38.46	26	16	0	52	129	200	123	0.15	29.5
c17816.graph_c0	gi|326889088|gb|JI402891.1|	38.24	34	21	0	160	59	71	172	0.055	30.4
c17828.graph_c0	gi|326896269|gb|JI410072.1|	36.84	38	24	0	89	202	118	231	0.1	29.5
c17856.graph_c0	gi|326893788|gb|JI407591.1|	82.09	134	24	0	2	403	496	95	2e-81	295
c17857.graph_c0	gi|326896050|gb|JI409853.1|	32.35	34	23	0	270	169	482	381	0.5	28.1
c1786.graph_c0	gi|326896009|gb|JI409812.1|	41.67	24	14	0	40	111	244	315	0.25	28.1
c17873.graph_c0	gi|326894972|gb|JI408775.1|	42.86	21	12	0	255	193	337	275	0.017	32.7
c17875.graph_c0	gi|326896790|gb|JI410593.1|	64.71	17	6	0	220	170	239	189	0.006	34.1
c17893.graph_c0	gi|326892123|gb|JI405926.1|	37.1	62	39	0	272	87	187	2	1e-09	56.1
c1790.graph_c0	gi|326888506|gb|JI402309.1|	35.14	37	24	0	210	100	130	20	0.24	28.1
c17906.graph_c0	gi|326890198|gb|JI404001.1|	50	20	10	0	261	202	167	108	0.27	28.6
c17917.graph_c0	gi|326888473|gb|JI402276.1|	29.17	24	17	0	142	213	54	125	0.23	28.6
c17917.graph_c1	gi|326886511|gb|JI400314.1|	45.45	22	12	0	105	40	195	260	3.9	24
c17924.graph_c0	gi|326896493|gb|JI410296.1|	52.38	21	10	0	189	127	299	237	0.024	31.3
c17926.graph_c0	gi|326897231|gb|JI411034.1|	42.11	19	11	0	315	371	49	105	2.6	26.3
c1793.graph_c0	gi|326889087|gb|JI402890.1|	51.72	29	14	0	88	2	106	20	0.001	36.3
c17930.graph_c0	gi|326892134|gb|JI405937.1|	37.84	37	23	0	116	6	3	113	0.017	31.8
c17933.graph_c0	gi|326887516|gb|JI401319.1|	75	52	13	0	2	157	99	254	5e-22	96.8
c17933.graph_c1	gi|326887516|gb|JI401319.1|	78.95	19	4	0	166	222	51	107	4e-05	40.9
c17938.graph_c0	gi|326890390|gb|JI404193.1|	57.14	14	6	0	13	54	164	205	0.87	26.3
c17943.graph_c0	gi|326891887|gb|JI405690.1|	38.89	18	11	0	391	338	298	245	0.19	29.9
c17950.graph_c0	gi|326890380|gb|JI404183.1|	42.42	33	19	0	26	124	182	84	0.13	29
c17962.graph_c0	gi|326891855|gb|JI405658.1|	64	25	9	0	137	211	117	191	2e-05	41.4
c17965.graph_c0	gi|326891390|gb|JI405193.1|	35.14	37	24	0	191	301	100	210	0.21	29.5
c17966.graph_c0	gi|326896410|gb|JI410213.1|	61.54	13	5	0	128	166	262	224	0.87	26.7
c17969.graph_c0	gi|326896494|gb|JI410297.1|	46.15	26	14	0	175	98	71	148	0.015	32.7
c17975.graph_c0	gi|326888288|gb|JI402091.1|	52.38	21	10	0	98	36	118	56	0.35	28.1
c17981.graph_c0	gi|326889523|gb|JI403326.1|	39.29	28	17	0	300	217	291	374	0.24	29
c1799.graph_c0	gi|326894493|gb|JI408296.1|	33.33	30	20	0	109	198	337	426	0.12	29
c17990.graph_c0	gi|326888724|gb|JI402527.1|	37.5	32	20	0	187	282	185	90	0.62	28.1
c180.graph_c0	gi|326893943|gb|JI407746.1|	41.67	24	14	0	342	271	843	772	0.96	27.2
c1801.graph_c0	gi|326891105|gb|JI404908.1|	34.78	23	15	0	23	91	310	378	1.1	26.3
c18030.graph_c0	gi|326896670|gb|JI410473.1|	80	20	4	0	22	81	180	121	0.0004	39.1
c18031.graph_c0	gi|326890631|gb|JI404434.1|	39.29	28	17	0	76	159	201	118	0.014	32.2
c18034.graph_c0	gi|326890994|gb|JI404797.1|	55	20	9	0	130	71	207	148	0.45	27.2
c18040.graph_c0	gi|326893952|gb|JI407755.1|	45.71	35	19	0	5	109	120	224	6e-10	37.3
c18042.graph_c0	gi|326888045|gb|JI401848.1|	64.29	14	5	0	240	199	339	298	0.45	27.6
c18050.graph_c0	gi|326886976|gb|JI400779.1|	39.29	28	17	0	149	66	306	223	0.86	26.3
c18059.graph_c0	gi|326896030|gb|JI409833.1|	33.33	30	20	0	124	35	249	338	0.54	27.6
c18061.graph_c0	gi|326892595|gb|JI406398.1|	52.38	21	10	0	131	193	305	367	0.7	26.7
c18062.graph_c0	gi|326889688|gb|JI403491.1|	35.29	34	22	0	83	184	183	82	0.14	29
c18067.graph_c0	gi|326887745|gb|JI401548.1|	73.33	15	4	0	93	49	330	286	0.018	33.6
c18073.graph_c0	gi|326892615|gb|JI406418.1|	61.54	13	5	0	165	203	62	24	0.11	24.9
c1808.graph_c0	gi|326892800|gb|JI406603.1|	30.43	46	32	0	141	4	305	442	0.016	33
c18093.graph_c0	gi|326886863|gb|JI400666.1|	57.78	45	19	0	192	326	137	3	4e-13	69
c18094.graph_c0	gi|326889798|gb|JI403601.1|	83.78	37	6	0	1	111	240	350	2e-17	81.3
c18097.graph_c0	gi|326892159|gb|JI405962.1|	36.36	22	14	0	231	296	373	308	0.77	27.6
c18107.graph_c0	gi|326897978|gb|JI411781.1|	47.62	21	11	0	93	155	238	176	1.3	26.7
c18108.graph_c0	gi|326895364|gb|JI409167.1|	29.41	17	12	0	417	367	46	96	0.12	24.9
c18112.graph_c0	gi|326886493|gb|JI400296.1|	66.67	24	8	0	68	139	216	145	0.0004	38.2
c18115.graph_c0	gi|326888088|gb|JI401891.1|	26.53	49	36	0	180	34	225	371	0.025	31.3
c18117.graph_c0	gi|326887795|gb|JI401598.1|	29.41	34	24	0	38	139	169	270	0.087	30.9
c18119.graph_c0	gi|326897636|gb|JI411439.1|	50	20	10	0	251	192	158	217	0.023	25.8
c18123.graph_c0	gi|326890070|gb|JI403873.1|	94.29	35	2	0	218	114	107	3	3e-18	84.5
c18131.graph_c0	gi|326889373|gb|JI403176.1|	38.71	31	19	0	225	133	174	82	0.14	29.5
c18132.graph_c0	gi|326895577|gb|JI409380.1|	44	25	14	0	240	166	83	9	0.16	29
c18149.graph_c0	gi|326888239|gb|JI402042.1|	44.44	18	10	0	418	471	160	107	0.3	30.4
c18150.graph_c0	gi|326887072|gb|JI400875.1|	66.67	15	5	0	154	198	103	147	0.57	27.2
c18164.graph_c0	gi|326896663|gb|JI410466.1|	39.29	28	17	0	212	295	13	96	3.8	24.9
c18180.graph_c0	gi|326890822|gb|JI404625.1|	28	25	18	0	103	177	102	28	0.14	29
c18184.graph_c0	gi|326895113|gb|JI408916.1|	44	25	14	0	110	184	397	323	0.054	30.4
c18187.graph_c0	gi|326889850|gb|JI403653.1|	47.37	19	10	0	83	27	227	171	0.14	29.9
c1819.graph_c0	gi|326895529|gb|JI409332.1|	33.33	30	20	0	95	6	216	127	0.47	27.2
c18196.graph_c0	gi|326896537|gb|JI410340.1|	64.71	17	6	0	119	69	176	126	0.093	29.5
c182.graph_c0	gi|326895667|gb|JI409470.1|	58.33	12	5	0	275	240	87	52	0.97	26.7
c18202.graph_c0	gi|326887957|gb|JI401760.1|	31.58	38	26	0	282	169	466	353	0.36	28.6
c18205.graph_c0	gi|326895814|gb|JI409617.1|	50	22	11	0	206	271	58	123	0.49	29
c1821.graph_c0	gi|326889597|gb|JI403400.1|	31.71	41	28	0	124	2	78	200	0.81	26.3
c18223.graph_c0	gi|326891135|gb|JI404938.1|	41.67	36	21	0	131	238	21	128	0.15	29.9
c18224.graph_c0	gi|326892573|gb|JI406376.1|	64.29	14	5	0	147	188	328	287	2.1	25.8
c18224.graph_c1	gi|326888061|gb|JI401864.1|	52.63	19	9	0	104	160	94	150	0.87	26.3
c1823.graph_c0	gi|326887423|gb|JI401226.1|	56.25	16	7	0	120	73	59	12	0.26	28.1
c18232.graph_c0	gi|326889753|gb|JI403556.1|	30	40	28	0	101	220	51	170	0.22	29.5
c18242.graph_c0	gi|326892926|gb|JI406729.1|	53.85	26	12	0	253	330	227	304	0.039	31.8
c18243.graph_c0	gi|326893332|gb|JI407135.1|	42.31	26	15	0	94	17	93	170	0.07	30.4
c18248.graph_c0	gi|326896630|gb|JI410433.1|	41.67	84	49	0	218	469	316	65	6e-17	81.7
c1825.graph_c0	gi|326895478|gb|JI409281.1|	50	20	10	0	107	166	95	36	0.18	28.6
c18251.graph_c0	gi|326889828|gb|JI403631.1|	51.85	27	13	0	211	131	133	53	0.049	30.4
c18256.graph_c0	gi|326896413|gb|JI410216.1|	50	24	12	0	254	183	409	338	0.23	29
c18261.graph_c0	gi|326895743|gb|JI409546.1|	71.43	14	4	0	86	127	155	114	0.84	27.2
c18265.graph_c0	gi|326895692|gb|JI409495.1|	41.38	29	17	0	182	96	305	219	0.092	29.5
c18268.graph_c0	gi|326891703|gb|JI405506.1|	48.15	27	14	0	153	73	246	166	0.068	30.4
c18271.graph_c0	gi|326893954|gb|JI407757.1|	57.26	124	53	0	375	4	1064	693	2e-41	162
c18277.graph_c0	gi|326895886|gb|JI409689.1|	90.84	131	12	0	2	394	406	798	2e-75	275
c18278.graph_c0	gi|326897337|gb|JI411140.1|	46.67	15	8	0	197	153	149	193	1.1	26.3
c1828.graph_c0	gi|326888240|gb|JI402043.1|	40.98	61	36	0	185	3	212	30	5e-11	61.1
c1828.graph_c1	gi|326890569|gb|JI404372.1|	57.89	19	8	0	200	256	81	25	0.28	28.6
c18282.graph_c0	gi|326889826|gb|JI403629.1|	25.86	58	43	0	181	8	24	197	0.009	34.5
c18282.graph_c1	gi|326893562|gb|JI407365.1|	58.82	17	7	0	161	111	348	398	0.19	28.6
c18287.graph_c0	gi|326894932|gb|JI408735.1|	36.36	33	21	0	288	386	146	48	0.046	31.8
c18289.graph_c0	gi|326893454|gb|JI407257.1|	64	50	18	0	1	150	278	129	3e-18	85.8
c18291.graph_c0	gi|326891208|gb|JI405011.1|	68.75	16	5	0	513	466	21	68	0.59	29
c18313.graph_c0	gi|326893927|gb|JI407730.1|	37.14	35	22	0	215	319	232	128	2.6	26.3
c18317.graph_c0	gi|326889866|gb|JI403669.1|	61.54	13	5	0	51	89	169	131	0.56	27.2
c18329.graph_c0	gi|326893381|gb|JI407184.1|	44.44	27	15	0	141	221	304	224	1.2	25.8
c18337.graph_c0	gi|326896944|gb|JI410747.1|	52.38	21	10	0	160	98	232	170	0.63	26.7
c1834.graph_c0	gi|326889299|gb|JI403102.1|	38.89	18	11	0	124	177	202	149	1.1	25.8
c18347.graph_c0	gi|326887903|gb|JI401706.1|	27.78	54	39	0	43	204	391	230	0.54	27.6
c1835.graph_c0	gi|326895888|gb|JI409691.1|	39.13	23	14	0	268	336	373	441	0.27	29
c18366.graph_c0	gi|326893114|gb|JI406917.1|	34.15	41	27	0	142	20	222	100	0.019	32
c18368.graph_c0	gi|326889454|gb|JI403257.1|	48	25	13	0	100	174	148	222	0.67	26.7
c1838.graph_c0	gi|326887650|gb|JI401453.1|	50	22	11	0	8	73	94	159	0.52	28.1
c18388.graph_c0	gi|326889498|gb|JI403301.1|	41.18	34	20	0	521	622	150	251	7e-07	33.6
c18390.graph_c0	gi|326890279|gb|JI404082.1|	42.31	26	15	0	68	145	92	169	0.017	24.9
c1840.graph_c0	gi|326892190|gb|JI405993.1|	35.29	34	22	0	243	142	256	155	0.089	29.9
c18404.graph_c0	gi|326897463|gb|JI411266.1|	45.45	22	12	0	118	53	221	156	0.52	27.2
c18405.graph_c0	gi|326892339|gb|JI406142.1|	28.57	35	25	0	101	205	123	19	0.09	29.5
c18409.graph_c0	gi|326892819|gb|JI406622.1|	42.86	21	12	0	101	163	141	79	0.79	26.3
c18413.graph_c0	gi|326889094|gb|JI402897.1|	60	15	6	0	79	123	242	198	0.14	29
c1842.graph_c0	gi|326898137|gb|JI411940.1|	28.26	46	33	0	66	203	41	178	0.001	36.3
c18425.graph_c0	gi|326886835|gb|JI400638.1|	50	20	10	0	245	186	102	43	0.57	28.1
c18431.graph_c0	gi|326892950|gb|JI406753.1|	61.54	13	5	0	39	1	487	449	1.5	25.4
c18434.graph_c0	gi|326890528|gb|JI404331.1|	50	26	13	0	142	65	257	334	0.011	33.1
c18435.graph_c0	gi|326892301|gb|JI406104.1|	50	22	11	0	77	12	28	93	0.16	29
c1844.graph_c0	gi|326895751|gb|JI409554.1|	42.11	19	11	0	222	166	305	361	1.3	25.8
c1844.graph_c1	gi|326895313|gb|JI409116.1|	43.75	32	18	0	228	323	20	115	0.0008	37.3
c18456.graph_c0	gi|326896526|gb|JI410329.1|	18.99	79	64	0	277	41	5	241	0.28	28.6
c1846.graph_c0	gi|326895777|gb|JI409580.1|	22.64	53	41	0	33	191	486	328	0.14	29.5
c18463.graph_c0	gi|326894412|gb|JI408215.1|	50	22	11	0	299	234	43	108	0.69	27.6
c18464.graph_c0	gi|326893340|gb|JI407143.1|	42.86	21	12	0	87	25	194	132	0.38	27.6
c18470.graph_c0	gi|326895503|gb|JI409306.1|	55	20	9	0	104	163	343	402	0.37	28.1
c18488.graph_c0	gi|326893862|gb|JI407665.1|	40	35	21	0	111	7	267	163	0.17	29.5
c1849.graph_c0	gi|326897407|gb|JI411210.1|	64.71	17	6	0	153	203	100	50	0.64	27.2
c1849.graph_c1	gi|326893843|gb|JI407646.1|	50	18	9	0	343	396	59	6	0.35	29.5
c18493.graph_c0	gi|326890333|gb|JI404136.1|	57.89	19	8	0	152	208	96	40	0.14	29
c1850.graph_c0	gi|326893754|gb|JI407557.1|	31.58	38	26	0	224	111	157	44	0.25	28.6
c18504.graph_c0	gi|326893796|gb|JI407599.1|	55	20	9	0	61	2	330	389	2.2	25.4
c18511.graph_c0	gi|326891152|gb|JI404955.1|	40	25	15	0	54	128	215	141	0.74	26.7
c1852.graph_c0	gi|326896062|gb|JI409865.1|	59.46	37	15	0	103	213	300	190	1e-11	62
c18528.graph_c0	gi|326895260|gb|JI409063.1|	40	25	15	0	145	71	70	144	0.3	28.1
c1853.graph_c0	gi|326887233|gb|JI401036.1|	44.64	56	31	0	22	189	378	211	8e-09	52.8
c18538.graph_c0	gi|326887861|gb|JI401664.1|	56.25	16	7	0	75	28	73	120	0.46	27.2
c18560.graph_c0	gi|326892390|gb|JI406193.1|	32.08	53	36	0	3	161	610	452	0.091	29.9
c18569.graph_c0	gi|326887536|gb|JI401339.1|	43.18	44	25	0	3	134	242	111	8e-05	39.6
c18587.graph_c0	gi|326889760|gb|JI403563.1|	33.33	27	18	0	33	113	121	41	1.1	26.7
c18591.graph_c0	gi|326896526|gb|JI410329.1|	37.5	48	30	0	146	3	62	205	5e-06	44.6
c18601.graph_c0	gi|326892693|gb|JI406496.1|	62.5	16	6	0	2	49	111	158	0.52	27.2
c18615.graph_c0	gi|326898034|gb|JI411837.1|	40	25	15	0	319	245	91	17	0.27	29
c1862.graph_c0	gi|326898143|gb|JI411946.1|	39.53	43	26	0	219	91	137	9	0.03	31.3
c18634.graph_c0	gi|326898189|gb|JI411992.1|	34.48	29	19	0	241	155	121	35	0.22	28.6
c18637.graph_c0	gi|326897368|gb|JI411171.1|	50	26	13	0	37	114	125	202	0.37	28.1
c18638.graph_c0	gi|326893874|gb|JI407677.1|	35.71	28	18	0	241	158	244	161	0.18	29
c18645.graph_c0	gi|326890184|gb|JI403987.1|	58.33	24	10	0	78	149	140	69	0.0001	40
c18652.graph_c0	gi|326888409|gb|JI402212.1|	40	25	15	0	25	99	224	150	0.23	28.1
c18653.graph_c0	gi|326888403|gb|JI402206.1|	50	20	10	0	185	126	72	13	0.23	29.9
c18658.graph_c0	gi|326893680|gb|JI407483.1|	38.89	36	22	0	60	167	40	147	0.43	27.6
c18663.graph_c0	gi|326895507|gb|JI409310.1|	55.56	18	8	0	2	55	383	330	0.52	27.2
c18675.graph_c0	gi|326897732|gb|JI411535.1|	35	20	13	0	111	170	100	159	0.43	27.2
c18677.graph_c0	gi|326891715|gb|JI405518.1|	36	25	16	0	173	247	175	101	0.074	24
c18681.graph_c0	gi|326895567|gb|JI409370.1|	40	25	15	0	50	124	682	756	0.81	27.2
c18686.graph_c0	gi|326892268|gb|JI406071.1|	38.1	21	13	0	167	105	244	306	0.47	27.2
c18688.graph_c0	gi|326896187|gb|JI409990.1|	53.33	15	7	0	123	167	4	48	1.1	26.3
c18694.graph_c0	gi|326895793|gb|JI409596.1|	52.94	17	8	0	69	19	45	95	2.2	24.9
c18694.graph_c1	gi|326894358|gb|JI408161.1|	81.82	11	2	0	9	41	215	247	2.5	25.8
c18704.graph_c0	gi|326894552|gb|JI408355.1|	40.91	22	13	0	321	256	807	742	0.25	29
c18708.graph_c0	gi|326897969|gb|JI411772.1|	80	10	2	0	35	6	121	150	2.2	24.9
c18715.graph_c0	gi|326891329|gb|JI405132.1|	39.29	28	17	0	27	110	435	518	0.29	28.1
c18719.graph_c0	gi|326894655|gb|JI408458.1|	60	20	8	0	186	127	163	104	0.0006	30.4
c18724.graph_c0	gi|326895357|gb|JI409160.1|	35.59	59	38	0	184	8	266	442	7e-07	47.1
c18729.graph_c0	gi|326890419|gb|JI404222.1|	52.63	19	9	0	28	84	183	239	1.2	25.8
c18730.graph_c0	gi|326897606|gb|JI411409.1|	41.67	24	14	0	78	149	184	113	0.3	27.6
c18732.graph_c0	gi|326898251|gb|JI412054.1|	43.48	23	13	0	75	7	44	112	1.2	26.3
c1874.graph_c0	gi|326892563|gb|JI406366.1|	52.38	21	10	0	144	82	227	289	0.31	28.1
c18752.graph_c0	gi|326894655|gb|JI408458.1|	48.28	58	30	0	176	3	36	209	2e-09	54.7
c18755.graph_c0	gi|326892159|gb|JI405962.1|	30.43	46	32	0	205	342	501	638	0.74	27.6
c18756.graph_c0	gi|326889750|gb|JI403553.1|	71.43	14	4	0	33	74	142	101	0.11	29.5
c18765.graph_c0	gi|326894521|gb|JI408324.1|	57.14	14	6	0	212	171	216	257	0.62	26.7
c1877.graph_c0	gi|326887147|gb|JI400950.1|	48.57	35	18	0	107	3	79	183	0.24	29
c18770.graph_c0	gi|326895480|gb|JI409283.1|	30.16	63	44	0	47	235	265	77	5e-06	45.5
c1878.graph_c0	gi|326889327|gb|JI403130.1|	33.33	30	20	0	255	166	404	315	0.099	29.9
c18788.graph_c0	gi|326895504|gb|JI409307.1|	39.39	33	20	0	291	193	1505	1603	0.077	31.8
c18789.graph_c0	gi|326888503|gb|JI402306.1|	46.43	28	15	0	193	110	207	124	0.12	30.9
c18791.graph_c0	gi|326895976|gb|JI409779.1|	53.33	15	7	0	134	90	280	236	3.1	24.9
c18792.graph_c0	gi|326895415|gb|JI409218.1|	42.86	63	36	0	191	3	199	387	3e-18	64.3
c18797.graph_c0	gi|326886503|gb|JI400306.1|	45.16	31	17	0	139	47	58	150	0.02	31.8
c18799.graph_c0	gi|326889251|gb|JI403054.1|	33.33	30	20	0	202	291	175	86	1.2	27.2
c18800.graph_c0	gi|326895283|gb|JI409086.1|	35	20	13	0	29	88	893	834	0.22	28.1
c18810.graph_c0	gi|326895741|gb|JI409544.1|	53.33	15	7	0	279	323	560	516	7.4	24.4
c18813.graph_c0	gi|326896072|gb|JI409875.1|	40	30	18	0	101	12	214	125	0.75	27.2
c18815.graph_c0	gi|326887031|gb|JI400834.1|	45	20	11	0	139	80	98	157	0.33	29
c18825.graph_c0	gi|326892599|gb|JI406402.1|	41.67	24	14	0	135	206	131	60	0.81	28.1
c1883.graph_c0	gi|326886533|gb|JI400336.1|	41.67	36	21	0	141	34	3	110	0.048	30.4
c18835.graph_c0	gi|326894794|gb|JI408597.1|	48.15	27	14	0	82	2	329	249	2e-06	34.5
c18839.graph_c0	gi|326890703|gb|JI404506.1|	41.3	46	27	0	1	138	173	310	2e-08	52.8
c18845.graph_c0	gi|326888970|gb|JI402773.1|	64.71	17	6	0	59	9	113	63	0.062	30.9
c18846.graph_c0	gi|326892329|gb|JI406132.1|	42.31	26	15	0	134	211	217	140	1.4	26.3
c18857.graph_c0	gi|326891793|gb|JI405596.1|	50	16	8	0	209	256	16	63	0.24	28.6
c18861.graph_c0	gi|326894975|gb|JI408778.1|	55.56	18	8	0	50	103	239	186	0.52	28.1
c18863.graph_c0	gi|326896033|gb|JI409836.1|	55	20	9	0	127	186	671	612	0.15	28.8
c18864.graph_c0	gi|326892183|gb|JI405986.1|	42.11	38	22	0	101	214	414	301	0.064	31.4
c18869.graph_c0	gi|326890700|gb|JI404503.1|	50	16	8	0	298	345	346	299	0.32	29
c1887.graph_c0	gi|326893942|gb|JI407745.1|	41.67	24	14	0	150	221	404	475	1.3	26.3
c18875.graph_c0	gi|326887984|gb|JI401787.1|	50	18	9	0	273	326	377	430	0.9	27.2
c18892.graph_c0	gi|326895013|gb|JI408816.1|	43.24	37	21	0	388	278	1239	1349	0.26	29.5
c18898.graph_c0	gi|326895013|gb|JI408816.1|	50	20	10	0	42	101	658	599	0.13	29
c18909.graph_c0	gi|326891272|gb|JI405075.1|	47.62	21	11	0	46	108	168	106	0.67	27.2
c18910.graph_c0	gi|326889695|gb|JI403498.1|	29.03	31	22	0	191	283	302	210	0.21	29
c18916.graph_c0	gi|326895399|gb|JI409202.1|	40	20	12	0	40	99	337	396	0.74	26.7
c18924.graph_c0	gi|326896769|gb|JI410572.1|	42.31	26	15	0	89	166	497	420	0.003	27.6
c18931.graph_c0	gi|326892402|gb|JI406205.1|	50	16	8	0	95	48	2	49	1.4	27.2
c18933.graph_c0	gi|326896198|gb|JI410001.1|	46.67	30	16	0	110	199	16	105	0.0006	36.8
c18936.graph_c0	gi|326896452|gb|JI410255.1|	47.62	21	11	0	122	184	72	10	0.093	30.9
c1894.graph_c0	gi|326889108|gb|JI402911.1|	58.82	17	7	0	21	71	300	250	0.3	27.6
c18946.graph_c0	gi|326894066|gb|JI407869.1|	76.27	59	14	0	198	22	659	835	1e-25	109
c18956.graph_c0	gi|326888846|gb|JI402649.1|	43.33	30	17	0	206	117	146	57	0.002	35.4
c18975.graph_c0	gi|326891166|gb|JI404969.1|	38.24	34	21	0	162	61	56	157	0.5	27.6
c1898.graph_c0	gi|326892745|gb|JI406548.1|	88.89	81	9	0	3	245	72	314	2e-35	141
c18980.graph_c0	gi|326895310|gb|JI409113.1|	40.91	22	13	0	241	176	170	235	1.3	26.3
c18983.graph_c0	gi|326895948|gb|JI409751.1|	37.04	27	17	0	153	73	73	153	0.14	29
c19001.graph_c0	gi|326890282|gb|JI404085.1|	44	25	14	0	111	185	71	145	0.4	28.6
c19004.graph_c0	gi|326895895|gb|JI409698.1|	52.38	21	10	0	209	147	366	428	0.31	28.1
c19011.graph_c0	gi|326891795|gb|JI405598.1|	37.5	24	15	0	185	114	95	24	1.2	27.2
c19012.graph_c0	gi|326894096|gb|JI407899.1|	31.43	35	24	0	159	55	1082	1186	1.6	25.4
c19015.graph_c0	gi|326894735|gb|JI408538.1|	30.91	55	38	0	3	167	147	311	0.0006	37.1
c19019.graph_c0	gi|326888969|gb|JI402772.1|	64.29	14	5	0	328	287	178	137	1.9	26.3
c19029.graph_c0	gi|326894897|gb|JI408700.1|	56.25	16	7	0	195	242	128	175	0.2	29
c19036.graph_c0	gi|326896493|gb|JI410296.1|	48	25	13	0	98	24	398	324	0.61	27.2
c19039.graph_c0	gi|326887467|gb|JI401270.1|	57.14	21	9	0	56	118	139	201	0.29	27.6
c19042.graph_c0	gi|326894755|gb|JI408558.1|	44.44	27	15	0	117	37	514	594	0.036	31.8
c19048.graph_c0	gi|326888180|gb|JI401983.1|	31.25	48	33	0	250	107	221	78	0.001	36.3
c1905.graph_c0	gi|326897861|gb|JI411664.1|	66.67	15	5	0	87	43	228	272	0.22	28.1
c19056.graph_c0	gi|326895006|gb|JI408809.1|	44.44	18	10	0	304	251	128	181	0.038	24.9
c1906.graph_c0	gi|326897271|gb|JI411074.1|	46.15	26	14	0	145	68	189	112	0.24	28.1
c19062.graph_c0	gi|326888228|gb|JI402031.1|	53.33	15	7	0	176	220	182	226	1.3	26.7
c19065.graph_c0	gi|326890593|gb|JI404396.1|	40.91	22	13	0	115	180	63	128	0.86	26.3
c19069.graph_c0	gi|326889568|gb|JI403371.1|	34.78	23	15	0	253	185	52	120	1.1	26.7
c19084.graph_c0	gi|326892153|gb|JI405956.1|	58.33	12	5	0	215	250	247	212	0.14	29.5
c19091.graph_c0	gi|326897842|gb|JI411645.1|	50	16	8	0	437	390	124	77	0.1	30.9
c19092.graph_c0	gi|326895857|gb|JI409660.1|	69.23	13	4	0	78	116	327	289	1.6	25.4
c19095.graph_c0	gi|326895267|gb|JI409070.1|	55	20	9	0	117	58	323	382	2.1	24.9
c19097.graph_c0	gi|326895830|gb|JI409633.1|	36.36	33	21	0	185	87	167	69	0.2	29.5
c19098.graph_c0	gi|326895601|gb|JI409404.1|	52.63	19	9	0	85	141	241	297	0.58	28.1
c191.graph_c0	gi|326895541|gb|JI409344.1|	30.3	33	23	0	255	157	2203	2301	0.51	27.6
c19103.graph_c0	gi|326888594|gb|JI402397.1|	48.15	27	14	0	87	7	298	378	0.28	29.5
c19108.graph_c0	gi|326891052|gb|JI404855.1|	40.74	27	16	0	104	184	281	201	0.46	27.2
c19128.graph_c0	gi|326892471|gb|JI406274.1|	46.15	26	14	0	151	228	461	538	0.005	34.1
c19132.graph_c0	gi|326889159|gb|JI402962.1|	42.31	26	15	0	150	73	199	122	0.36	28.6
c19135.graph_c0	gi|326889206|gb|JI403009.1|	31.43	35	24	0	237	133	61	165	0.37	28.6
c1917.graph_c0	gi|326891033|gb|JI404836.1|	39.29	28	17	0	89	6	473	390	0.12	29
c1917.graph_c1	gi|326894701|gb|JI408504.1|	47.06	17	9	0	175	225	257	307	0.82	26.7
c19187.graph_c0	gi|326894329|gb|JI408132.1|	44.44	27	15	0	23	103	148	68	0.12	29.5
c19191.graph_c0	gi|326895897|gb|JI409700.1|	24	50	38	0	111	260	554	703	0.1	30.9
c19203.graph_c0	gi|326893411|gb|JI407214.1|	53.33	15	7	0	99	55	278	234	1.1	26.7
c1921.graph_c0	gi|326896825|gb|JI410628.1|	42.31	26	15	0	181	104	172	95	0.17	28.6
c19221.graph_c0	gi|326893790|gb|JI407593.1|	36.84	38	24	0	186	299	8	121	0.28	29
c19223.graph_c0	gi|326894780|gb|JI408583.1|	56.25	16	7	0	140	187	482	435	0.35	27.6
c19236.graph_c0	gi|326892195|gb|JI405998.1|	35.14	37	24	0	168	58	144	34	0.55	27.6
c1924.graph_c0	gi|326893563|gb|JI407366.1|	50	22	11	0	57	122	274	339	0.13	29.9
c19242.graph_c0	gi|326891540|gb|JI405343.1|	50	26	13	0	118	195	38	115	0.31	27.6
c19249.graph_c0	gi|326894467|gb|JI408270.1|	43.33	30	17	0	109	20	159	248	0.043	31.7
c19256.graph_c0	gi|326897342|gb|JI411145.1|	56.25	16	7	0	92	139	85	132	0.87	26.3
c1926.graph_c0	gi|326894487|gb|JI408290.1|	61.11	18	7	0	254	307	1077	1130	0.61	27.6
c19270.graph_c0	gi|326889903|gb|JI403706.1|	41.67	24	14	0	270	199	221	292	1.2	26.7
c19278.graph_c0	gi|326896076|gb|JI409879.1|	57.89	19	8	0	40	96	1045	989	0.67	27.6
c19286.graph_c0	gi|326890772|gb|JI404575.1|	45.45	22	12	0	244	309	194	129	0.46	28.1
c19297.graph_c0	gi|326895023|gb|JI408826.1|	52	25	12	0	13	87	22	96	0.016	32.7
c19304.graph_c0	gi|326893768|gb|JI407571.1|	36.67	30	19	0	32	121	103	14	0.49	28.6
c1931.graph_c0	gi|326893275|gb|JI407078.1|	63.64	11	4	0	61	93	360	328	0.66	27.2
c19317.graph_c0	gi|326897168|gb|JI410971.1|	38.46	26	16	0	24	101	301	378	2.1	24.9
c1932.graph_c0	gi|326895139|gb|JI408942.1|	79.17	72	15	0	2	217	301	86	2e-33	134
c19322.graph_c0	gi|326895382|gb|JI409185.1|	47.83	23	12	0	354	286	129	61	1	27.6
c19323.graph_c0	gi|326893554|gb|JI407357.1|	38.1	21	13	0	212	150	32	94	0.57	27.2
c1933.graph_c0	gi|326886544|gb|JI400347.1|	53.97	63	29	0	190	2	304	116	1e-16	80.3
c19341.graph_c0	gi|326891171|gb|JI404974.1|	50	20	10	0	27	86	353	412	0.17	28.6
c19349.graph_c0	gi|326895023|gb|JI408826.1|	56.25	16	7	0	106	153	2	49	0.82	28.1
c19360.graph_c0	gi|326887878|gb|JI401681.1|	100	13	0	0	40	2	349	311	6e-05	40
c19362.graph_c0	gi|326890222|gb|JI404025.1|	40	30	18	0	307	218	93	182	1.2	26.7
c19366.graph_c0	gi|326898127|gb|JI411930.1|	50	14	7	0	239	280	122	163	0.29	28.6
c19368.graph_c0	gi|326891570|gb|JI405373.1|	44.83	29	16	0	195	109	31	117	0.49	27.6
c1937.graph_c0	gi|326898037|gb|JI411840.1|	39.39	33	20	0	156	254	100	198	0.013	33.1
c19370.graph_c0	gi|326895476|gb|JI409279.1|	30.95	42	29	0	214	89	369	494	0.009	34.1
c19375.graph_c0	gi|326887695|gb|JI401498.1|	48	25	13	0	89	163	207	133	0.59	27.2
c19390.graph_c0	gi|326898053|gb|JI411856.1|	36	25	16	0	153	79	77	3	0.65	26.7
c19392.graph_c0	gi|326895156|gb|JI408959.1|	61.29	62	24	0	3	188	299	114	5e-24	103
c19405.graph_c0	gi|326888166|gb|JI401969.1|	50	22	11	0	109	174	102	37	0.27	29.5
c19406.graph_c0	gi|326895007|gb|JI408810.1|	40.74	27	16	0	208	128	686	606	0.025	31.3
c1941.graph_c0	gi|326895225|gb|JI409028.1|	36	25	16	0	110	184	178	104	0.13	29.9
c19417.graph_c0	gi|326893918|gb|JI407721.1|	70.49	61	18	0	6	188	2	184	2e-28	118
c1942.graph_c0	gi|326895310|gb|JI409113.1|	75.61	41	10	0	299	177	44	166	5e-36	105
c19423.graph_c0	gi|326897933|gb|JI411736.1|	61.54	13	5	0	150	112	51	89	0.55	28.6
c19426.graph_c0	gi|326891780|gb|JI405583.1|	46.15	26	14	0	366	443	273	196	0.016	34.1
c19432.graph_c0	gi|326887759|gb|JI401562.1|	56	25	11	0	119	45	123	49	0.0002	38.2
c19435.graph_c0	gi|326888308|gb|JI402111.1|	50	18	9	0	118	65	137	84	0.49	27.6
c19442.graph_c0	gi|326892428|gb|JI406231.1|	38.89	18	11	0	170	223	227	174	0.029	31.3
c19443.graph_c0	gi|326893022|gb|JI406825.1|	44.44	27	15	0	85	5	98	18	0.078	29.9
c19444.graph_c0	gi|326889460|gb|JI403263.1|	62.5	16	6	0	2	49	157	204	0.6	27.2
c19447.graph_c0	gi|326893391|gb|JI407194.1|	47.37	19	10	0	207	263	71	127	0.39	29.5
c1948.graph_c0	gi|326887320|gb|JI401123.1|	28.95	38	27	0	224	337	35	148	1.4	26.7
c19494.graph_c0	gi|326894591|gb|JI408394.1|	50	18	9	0	1	54	273	220	1.1	27.2
c19496.graph_c0	gi|326892254|gb|JI406057.1|	30.43	23	16	0	205	273	82	150	1.3	26.3
c19508.graph_c0	gi|326893065|gb|JI406868.1|	40.54	37	22	0	241	131	302	412	0.09	30.6
c1951.graph_c0	gi|326893589|gb|JI407392.1|	44.44	27	15	0	123	203	610	530	0.43	27.2
c19515.graph_c0	gi|326892109|gb|JI405912.1|	34.62	26	17	0	27	104	257	334	0.52	28.1
c19516.graph_c0	gi|326888800|gb|JI402603.1|	52.08	48	23	0	68	211	2	145	0.0008	37.6
c19522.graph_c0	gi|326890954|gb|JI404757.1|	37.04	27	17	0	272	192	265	345	0.55	28.1
c19526.graph_c0	gi|326893031|gb|JI406834.1|	39.29	28	17	0	56	139	358	275	0.042	30.9
c19527.graph_c0	gi|326889266|gb|JI403069.1|	34.38	32	21	0	206	111	245	150	0.67	26.7
c1953.graph_c0	gi|326892405|gb|JI406208.1|	47.37	19	10	0	108	52	508	452	0.47	27.2
c19535.graph_c0	gi|326897498|gb|JI411301.1|	40	30	18	0	204	115	122	33	1	26.3
c19542.graph_c0	gi|326889225|gb|JI403028.1|	60	55	22	0	109	273	306	142	5e-17	51.9
c19551.graph_c0	gi|326889266|gb|JI403069.1|	50	28	14	0	2	85	408	325	0.2	29
c19557.graph_c0	gi|326887252|gb|JI401055.1|	29.03	31	22	0	123	215	229	137	0.45	27.2
c19570.graph_c0	gi|326892207|gb|JI406010.1|	50	14	7	0	91	132	61	102	1.1	25.8
c19576.graph_c0	gi|326897097|gb|JI410900.1|	41.38	29	17	0	263	177	245	159	0.25	28.6
c1958.graph_c0	gi|326896808|gb|JI410611.1|	68.75	16	5	0	101	148	132	85	0.099	30.4
c19580.graph_c0	gi|326890387|gb|JI404190.1|	42.59	54	31	0	289	128	300	139	1e-06	46.4
c1959.graph_c0	gi|326888663|gb|JI402466.1|	30.77	39	27	0	247	131	275	159	0.27	29
c19592.graph_c0	gi|326892343|gb|JI406146.1|	28.57	35	25	0	36	140	163	59	0.38	27.6
c19600.graph_c0	gi|326895477|gb|JI409280.1|	34.48	29	19	0	51	137	732	818	0.24	28.1
c19609.graph_c0	gi|326890675|gb|JI404478.1|	50	20	10	0	69	10	136	77	0.13	29.9
c19613.graph_c0	gi|326892966|gb|JI406769.1|	39.39	33	20	0	135	233	504	406	0.11	29.5
c19618.graph_c0	gi|326891412|gb|JI405215.1|	69.89	93	28	0	51	329	403	125	2e-38	152
c19623.graph_c0	gi|326897187|gb|JI410990.1|	37.5	32	20	0	78	173	301	206	0.83	27.2
c19629.graph_c0	gi|326890705|gb|JI404508.1|	87.8	41	5	0	125	3	268	146	9e-23	99.6
c19630.graph_c0	gi|326896873|gb|JI410676.1|	53.33	15	7	0	204	160	105	149	0.62	26.7
c19647.graph_c0	gi|326894842|gb|JI408645.1|	47.06	17	9	0	51	1	114	64	0.87	26.7
c19660.graph_c0	gi|326891234|gb|JI405037.1|	40	30	18	0	156	67	192	103	0.005	34.1
c19666.graph_c0	gi|326892505|gb|JI406308.1|	33.33	39	26	0	4	120	141	257	0.05	30.9
c19668.graph_c0	gi|326895210|gb|JI409013.1|	45	20	11	0	173	114	1251	1310	1.7	25.8
c1967.graph_c0	gi|326892736|gb|JI406539.1|	31.58	38	26	0	163	276	155	268	0.8	27.8
c19702.graph_c0	gi|326893114|gb|JI406917.1|	61.54	13	5	0	179	217	58	96	0.38	27.6
c19706.graph_c0	gi|326896444|gb|JI410247.1|	57.39	115	49	0	2	346	33	377	8e-36	144
c1972.graph_c0	gi|326892238|gb|JI406041.1|	52.94	17	8	0	142	192	287	237	0.17	28.6
c19725.graph_c0	gi|326893125|gb|JI406928.1|	36.96	46	29	0	296	159	497	634	0.006	35.4
c1973.graph_c0	gi|326889811|gb|JI403614.1|	32	25	17	0	123	49	264	190	1.2	26.7
c19753.graph_c0	gi|326888275|gb|JI402078.1|	38.46	26	16	0	200	123	332	255	0.12	29
c1976.graph_c0	gi|326889076|gb|JI402879.1|	30.19	53	37	0	225	383	2	160	9e-06	44.1
c19763.graph_c0	gi|326891478|gb|JI405281.1|	52	25	12	0	58	132	264	190	0.61	27.2
c1977.graph_c0	gi|326888476|gb|JI402279.1|	39.02	41	25	0	130	252	214	92	0.004	35.4
c19776.graph_c0	gi|326886581|gb|JI400384.1|	43.33	30	17	0	122	33	158	247	0.05	30.4
c19779.graph_c0	gi|326896910|gb|JI410713.1|	50	20	10	0	57	116	105	164	1.9	25.8
c1978.graph_c0	gi|326895131|gb|JI408934.1|	47.06	17	9	0	116	66	3	53	1.6	26.3
c19784.graph_c0	gi|326892645|gb|JI406448.1|	39.39	33	20	0	184	86	90	188	0.43	28.1
c19788.graph_c0	gi|326894721|gb|JI408524.1|	71.43	14	4	0	184	225	78	119	0.18	29
c19795.graph_c0	gi|326896330|gb|JI410133.1|	31.91	47	32	0	165	25	206	66	0.09	29.5
c198.graph_c0	gi|326893702|gb|JI407505.1|	46.43	28	15	0	263	180	224	141	0.13	29.8
c19800.graph_c0	gi|326886728|gb|JI400531.1|	33.33	42	28	0	75	200	203	328	0.11	30.4
c19805.graph_c0	gi|326894863|gb|JI408666.1|	69.23	13	4	0	225	263	147	185	1.1	27.6
c1981.graph_c0	gi|326892616|gb|JI406419.1|	50	24	12	0	30	101	182	111	0.073	30.4
c19822.graph_c0	gi|326896569|gb|JI410372.1|	41.94	31	18	0	4	96	183	91	0.043	30.9
c19824.graph_c0	gi|326889629|gb|JI403432.1|	30.77	39	27	0	123	7	285	169	0.91	27.2
c1985.graph_c0	gi|326894712|gb|JI408515.1|	61.11	18	7	0	132	79	512	459	0.9	26.3
c19860.graph_c0	gi|326896574|gb|JI410377.1|	34.15	41	27	0	219	97	71	193	0.031	31.8
c19869.graph_c0	gi|326889826|gb|JI403629.1|	38.1	42	26	0	177	52	33	158	0.004	34.1
c19874.graph_c0	gi|326888989|gb|JI402792.1|	80	10	2	0	228	199	230	201	3.4	24.4
c19886.graph_c0	gi|326894888|gb|JI408691.1|	48.57	35	18	0	190	86	188	84	0.002	35
c19891.graph_c0	gi|326895025|gb|JI408828.1|	56.25	16	7	0	134	87	221	174	0.45	27.2
c19892.graph_c0	gi|326894096|gb|JI407899.1|	43.75	16	9	0	222	175	41	88	4.3	25.4
c19933.graph_c0	gi|326893635|gb|JI407438.1|	43.33	30	17	0	235	146	399	310	0.28	28.1
c19940.graph_c0	gi|326892454|gb|JI406257.1|	52.17	23	11	0	102	34	176	244	0.19	29
c19945.graph_c0	gi|326895277|gb|JI409080.1|	36	25	16	0	166	240	190	116	0.26	28.6
c19954.graph_c0	gi|326897903|gb|JI411706.1|	58.62	29	12	0	207	293	46	132	1e-05	43.2
c19967.graph_c0	gi|326896014|gb|JI409817.1|	30	30	21	0	95	6	60	149	2.9	25.4
c19985.graph_c0	gi|326894576|gb|JI408379.1|	55.56	18	8	0	169	116	571	518	0.68	27.2
c19990.graph_c0	gi|326887773|gb|JI401576.1|	68	25	8	0	197	271	188	114	1e-06	46
c19999.graph_c0	gi|326895061|gb|JI408864.1|	57.89	19	8	0	243	187	300	244	0.32	28.6
c2000.graph_c0	gi|326893296|gb|JI407099.1|	40.91	22	13	0	22	87	314	379	0.86	26.7
c20004.graph_c0	gi|326895897|gb|JI409700.1|	47.62	21	11	0	174	236	425	487	0.49	25.4
c20006.graph_c0	gi|326887079|gb|JI400882.1|	42.11	19	11	0	48	104	201	145	0.037	24.9
c2001.graph_c0	gi|326894481|gb|JI408284.1|	46.15	26	14	0	117	40	277	200	0.19	30.4
c20011.graph_c0	gi|326894708|gb|JI408511.1|	51.02	49	24	0	82	228	353	499	4e-12	64.3
c20014.graph_c0	gi|326892447|gb|JI406250.1|	50	22	11	0	18	83	315	380	0.24	28.1
c20020.graph_c0	gi|326893474|gb|JI407277.1|	64.29	14	5	0	61	20	242	283	1.3	26.7
c20023.graph_c0	gi|326896571|gb|JI410374.1|	60	20	8	0	175	234	124	65	0.012	33.6
c2003.graph_c0	gi|326893190|gb|JI406993.1|	61.11	18	7	0	106	53	205	258	1.6	25.4
c20055.graph_c0	gi|326887557|gb|JI401360.1|	57.14	21	9	0	269	207	63	1	0.36	28.1
c20065.graph_c0	gi|326893714|gb|JI407517.1|	55	20	9	0	123	64	487	428	0.42	28.6
c20077.graph_c0	gi|326893180|gb|JI406983.1|	46.15	26	14	0	123	46	47	124	0.68	27.2
c20082.graph_c0	gi|326889084|gb|JI402887.1|	39.13	23	14	0	124	192	73	141	1	27.2
c20105.graph_c0	gi|326893731|gb|JI407534.1|	40	30	18	0	223	134	80	169	0.033	31.8
c20107.graph_c0	gi|326893598|gb|JI407401.1|	44	25	14	0	4	78	132	206	0.79	26.7
c20113.graph_c0	gi|326888974|gb|JI402777.1|	81.82	11	2	0	33	1	282	250	1.2	27.2
c20118.graph_c0	gi|326891413|gb|JI405216.1|	42.86	21	12	0	135	73	499	561	0.89	26.7
c20149.graph_c0	gi|326892156|gb|JI405959.1|	33.33	45	30	0	39	173	224	90	0.57	27.6
c20167.graph_c0	gi|326891543|gb|JI405346.1|	78.57	14	3	0	176	217	172	131	0.16	29.5
c20169.graph_c0	gi|326890689|gb|JI404492.1|	45	20	11	0	300	241	120	179	0.55	28.1
c2018.graph_c0	gi|326897223|gb|JI411026.1|	56.25	16	7	0	91	138	176	129	0.035	31.3
c20189.graph_c0	gi|326892978|gb|JI406781.1|	33.33	33	22	0	1309	1407	554	456	0.54	30.4
c20196.graph_c0	gi|326895472|gb|JI409275.1|	44.83	29	16	0	191	105	12	98	0.097	29.5
c20215.graph_c0	gi|326888194|gb|JI401997.1|	46.15	13	7	0	261	223	62	100	0.55	22.1
c20217.graph_c0	gi|326892184|gb|JI405987.1|	42.86	21	12	0	20	82	35	97	0.26	29.5
c20219.graph_c0	gi|326891456|gb|JI405259.1|	35.48	31	20	0	349	441	160	252	1.1	27.6
c20220.graph_c0	gi|326887529|gb|JI401332.1|	87.5	48	6	0	87	230	115	258	7e-24	103
c20228.graph_c0	gi|326886538|gb|JI400341.1|	72.73	11	3	0	76	108	93	61	0.36	27.6
c2023.graph_c0	gi|326891572|gb|JI405375.1|	37.5	24	15	0	197	126	68	139	0.011	32.7
c20231.graph_c0	gi|326892541|gb|JI406344.1|	48	25	13	0	341	267	8	82	0.71	27.6
c20242.graph_c0	gi|326896709|gb|JI410512.1|	31.25	32	22	0	281	186	196	291	2.5	25.8
c20243.graph_c0	gi|326896339|gb|JI410142.1|	36.36	22	14	0	169	234	107	42	0.3	28.1
c20247.graph_c0	gi|326898234|gb|JI412037.1|	37.84	37	23	0	193	83	125	235	0.17	30.4
c2026.graph_c0	gi|326894894|gb|JI408697.1|	57.69	52	22	0	4	159	156	1	1e-15	76.7
c20272.graph_c0	gi|326889082|gb|JI402885.1|	39.29	28	17	0	5	88	175	258	0.81	26.7
c20273.graph_c0	gi|326889175|gb|JI402978.1|	55.84	77	34	0	28	258	149	379	2e-22	98.7
c2028.graph_c0	gi|326893877|gb|JI407680.1|	46.67	15	8	0	144	188	310	266	0.47	22.6
c20293.graph_c0	gi|326889415|gb|JI403218.1|	45.45	22	12	0	144	209	260	195	0.009	33
c20298.graph_c0	gi|326892160|gb|JI405963.1|	42.86	28	16	0	20	103	67	150	2.3	24.8
c20299.graph_c0	gi|326890322|gb|JI404125.1|	52.94	17	8	0	27	77	34	84	0.43	28.1
c203.graph_c0	gi|326893633|gb|JI407436.1|	45.45	22	12	0	95	30	213	278	0.29	28.6
c2030.graph_c0	gi|326896510|gb|JI410313.1|	58.82	17	7	0	225	175	166	116	0.14	29
c20306.graph_c0	gi|326894899|gb|JI408702.1|	38.24	34	21	0	260	159	52	153	0.11	30.4
c2031.graph_c0	gi|326893954|gb|JI407757.1|	50	20	10	0	202	143	1225	1284	0.22	28.1
c20310.graph_c0	gi|326898178|gb|JI411981.1|	47.54	61	32	0	50	232	188	6	4e-15	76.2
c20317.graph_c0	gi|326890712|gb|JI404515.1|	66.67	18	6	0	75	128	417	364	0.91	26.7
c20325.graph_c0	gi|326894682|gb|JI408485.1|	58.33	12	5	0	116	81	88	53	0.46	27.6
c2033.graph_c0	gi|326886844|gb|JI400647.1|	64.29	14	5	0	196	155	161	120	0.79	27.2
c2034.graph_c0	gi|326895389|gb|JI409192.1|	31.58	38	26	0	216	329	477	590	0.14	29.9
c20350.graph_c0	gi|326893012|gb|JI406815.1|	61.11	18	7	0	121	174	549	496	0.45	27.2
c20363.graph_c0	gi|326891892|gb|JI405695.1|	52.38	21	10	0	100	38	7	69	0.23	28.1
c20366.graph_c0	gi|326891841|gb|JI405644.1|	26.19	42	31	0	15	140	271	146	0.43	27.2
c20369.graph_c0	gi|326890220|gb|JI404023.1|	50	36	18	0	289	182	95	202	6e-06	44.1
c20371.graph_c0	gi|326895508|gb|JI409311.1|	69.23	13	4	0	265	303	678	716	2.1	25.8
c2039.graph_c0	gi|326895808|gb|JI409611.1|	61.19	67	26	0	203	3	92	292	1e-23	102
c20405.graph_c0	gi|326892346|gb|JI406149.1|	52.63	38	18	0	114	1	94	207	5e-08	50.6
c20406.graph_c0	gi|326896369|gb|JI410172.1|	54.55	22	10	0	161	96	87	22	0.27	29.5
c20407.graph_c0	gi|326892175|gb|JI405978.1|	34.38	32	21	0	92	187	54	149	0.73	28.1
c20410.graph_c0	gi|326886582|gb|JI400385.1|	77.42	62	14	0	187	372	4	189	8e-28	117
c2042.graph_c0	gi|326887502|gb|JI401305.1|	50	24	12	0	229	158	201	272	0.31	28.6
c20430.graph_c0	gi|326892321|gb|JI406124.1|	54.17	24	11	0	393	464	349	278	0.69	28.6
c20434.graph_c0	gi|326894380|gb|JI408183.1|	33.33	33	22	0	225	127	1379	1281	0.77	26.7
c20436.graph_c0	gi|326894606|gb|JI408409.1|	22.92	48	37	0	181	38	153	10	1.2	27.6
c20439.graph_c0	gi|326895611|gb|JI409414.1|	43.48	23	13	0	201	133	135	67	0.42	28.1
c20457.graph_c0	gi|326896322|gb|JI410125.1|	68.75	16	5	0	3	50	74	121	0.011	32.7
c20466.graph_c0	gi|326892124|gb|JI405927.1|	44.44	27	15	0	88	8	96	16	0.084	29.9
c20468.graph_c0	gi|326892832|gb|JI406635.1|	88.89	9	1	0	28	2	338	312	0.42	27.2
c20478.graph_c0	gi|326892744|gb|JI406547.1|	48.15	27	14	0	176	96	60	140	0.18	29.5
c2048.graph_c0	gi|326897199|gb|JI411002.1|	34.04	47	31	0	5	145	192	52	0.13	29
c2049.graph_c0	gi|326889693|gb|JI403496.1|	37.04	27	17	0	268	188	161	81	0.51	28.1
c205.graph_c0	gi|326892264|gb|JI406067.1|	34.78	46	30	0	326	189	1535	1398	1.7	26.3
c20503.graph_c0	gi|326895719|gb|JI409522.1|	50	20	10	0	151	92	145	86	0.3	28.1
c20504.graph_c0	gi|326892583|gb|JI406386.1|	83.33	12	2	0	15	50	361	326	0.25	29.9
c20506.graph_c0	gi|326891343|gb|JI405146.1|	40.91	22	13	0	79	144	91	26	0.48	27.6
c20515.graph_c0	gi|326891317|gb|JI405120.1|	28.12	32	23	0	103	198	90	185	0.82	26.7
c20525.graph_c0	gi|326892930|gb|JI406733.1|	39.13	23	14	0	373	441	35	103	1.1	28.1
c20526.graph_c0	gi|326897941|gb|JI411744.1|	42.31	26	15	0	269	346	128	51	0.083	30.8
c20530.graph_c0	gi|326886729|gb|JI400532.1|	46.15	26	14	0	217	140	65	142	1.1	26.7
c20536.graph_c0	gi|326896649|gb|JI410452.1|	42.86	35	20	0	157	53	90	194	0.6	27.6
c20538.graph_c0	gi|326896309|gb|JI410112.1|	45.16	31	17	0	56	148	314	222	0.66	29
c20563.graph_c0	gi|326895865|gb|JI409668.1|	82.2	118	21	0	356	3	529	176	3e-64	238
c2057.graph_c0	gi|326895690|gb|JI409493.1|	52.38	63	30	0	344	156	156	344	1e-25	95.5
c2058.graph_c0	gi|326892174|gb|JI405977.1|	34	50	33	0	42	191	43	192	0.038	30.9
c20596.graph_c0	gi|326887626|gb|JI401429.1|	73.33	15	4	0	128	172	115	159	0.16	29.5
c206.graph_c0	gi|326888335|gb|JI402138.1|	32.26	31	21	0	125	217	199	107	0.89	27.2
c20611.graph_c0	gi|326893711|gb|JI407514.1|	45.83	24	13	0	93	164	223	294	0.19	28.6
c20612.graph_c0	gi|326894070|gb|JI407873.1|	34.48	29	19	0	339	253	177	263	0.014	26.3
c20622.graph_c0	gi|326895479|gb|JI409282.1|	50	24	12	0	260	189	705	634	1.2	26.3
c20656.graph_c0	gi|326896890|gb|JI410693.1|	33.33	39	26	0	98	214	266	150	0.32	28.6
c20674.graph_c0	gi|326888727|gb|JI402530.1|	47.83	23	12	0	111	43	311	243	0.57	26.7
c20681.graph_c0	gi|326896554|gb|JI410357.1|	42.31	26	15	0	189	266	223	300	0.072	30.4
c20684.graph_c0	gi|326896038|gb|JI409841.1|	71.7	53	15	0	161	3	4	162	8e-21	92.7
c20689.graph_c0	gi|326889068|gb|JI402871.1|	45.45	22	12	0	127	62	318	253	2.3	25.4
c20696.graph_c0	gi|326890422|gb|JI404225.1|	31.03	29	20	0	47	133	53	139	0.79	27.2
c207.graph_c0	gi|326898012|gb|JI411815.1|	39.29	28	17	0	252	169	1	84	0.002	26.3
c2070.graph_c0	gi|326894421|gb|JI408224.1|	41.94	31	18	0	158	66	167	75	0.072	29.9
c20710.graph_c0	gi|326896975|gb|JI410778.1|	56.25	16	7	0	320	273	137	90	0.72	28.1
c20717.graph_c0	gi|326898120|gb|JI411923.1|	44.44	18	10	0	168	221	124	177	0.86	27.2
c20726.graph_c0	gi|326895696|gb|JI409499.1|	50	20	10	0	111	52	1004	945	0.11	25.4
c20730.graph_c0	gi|326894627|gb|JI408430.1|	40	25	15	0	193	119	135	61	0.064	29.9
c20748.graph_c0	gi|326898124|gb|JI411927.1|	39.29	28	17	0	3	86	161	244	0.67	27.2
c2075.graph_c0	gi|326889672|gb|JI403475.1|	52.94	17	8	0	193	143	314	264	0.6	27.2
c20756.graph_c0	gi|326898217|gb|JI412020.1|	52.63	19	9	0	6	62	92	148	1.5	26.7
c2076.graph_c0	gi|326889906|gb|JI403709.1|	41.18	17	10	0	190	140	64	114	0.83	26.3
c20786.graph_c0	gi|326889289|gb|JI403092.1|	47.62	21	11	0	235	297	75	137	0.22	29
c20789.graph_c0	gi|326895330|gb|JI409133.1|	46.15	26	14	0	180	257	537	614	0.061	30.5
c20795.graph_c0	gi|326895546|gb|JI409349.1|	48	25	13	0	140	214	562	636	0.34	27.6
c208.graph_c0	gi|326888165|gb|JI401968.1|	37.5	24	15	0	90	161	423	352	0.74	26.7
c2080.graph_c0	gi|326889839|gb|JI403642.1|	50	28	14	0	126	209	257	174	0.028	31.8
c20802.graph_c0	gi|326893075|gb|JI406878.1|	47.37	19	10	0	134	190	229	173	3.5	24.4
c20819.graph_c0	gi|326887472|gb|JI401275.1|	56.52	23	10	0	11	79	227	159	0.049	30.4
c20822.graph_c0	gi|326893869|gb|JI407672.1|	58.82	17	7	0	310	260	299	349	1.6	26.3
c20823.graph_c0	gi|326889826|gb|JI403629.1|	54.55	22	10	0	35	100	48	113	0.039	30.9
c20863.graph_c0	gi|326886863|gb|JI400666.1|	42.86	21	12	0	147	209	256	318	1.6	25.4
c2087.graph_c0	gi|326897932|gb|JI411735.1|	50	18	9	0	101	48	129	182	0.24	28.1
c20875.graph_c0	gi|326896203|gb|JI410006.1|	58.82	17	7	0	212	262	173	123	1.2	26.3
c20877.graph_c0	gi|326893681|gb|JI407484.1|	100	7	0	0	298	278	782	802	0.24	24
c2088.graph_c0	gi|326889580|gb|JI403383.1|	36.36	22	14	0	223	288	117	182	0.84	27.2
c2088.graph_c1	gi|326889087|gb|JI402890.1|	62.5	16	6	0	59	106	56	9	0.41	28.1
c20881.graph_c0	gi|326895544|gb|JI409347.1|	34.48	29	19	0	185	99	93	7	0.4	27.6
c20892.graph_c0	gi|326887446|gb|JI401249.1|	29.27	41	29	0	84	206	307	185	0.055	31.3
c20898.graph_c0	gi|326894491|gb|JI408294.1|	33.33	36	24	0	12	119	169	62	0.066	30.9
c20905.graph_c0	gi|326896182|gb|JI409985.1|	50	82	41	0	267	22	1	246	6e-12	64.3
c20921.graph_c0	gi|326893181|gb|JI406984.1|	60	25	10	0	86	160	152	226	7e-06	43.6
c2093.graph_c0	gi|326891771|gb|JI405574.1|	61.11	18	7	0	119	66	10	63	0.009	33.6
c20940.graph_c0	gi|326893929|gb|JI407732.1|	60	15	6	0	231	187	85	41	1.5	27.2
c2095.graph_c0	gi|326895829|gb|JI409632.1|	81.4	86	16	0	258	1	134	391	1e-37	149
c20960.graph_c0	gi|326889076|gb|JI402879.1|	63.16	38	14	0	28	141	308	421	7e-12	64.8
c20977.graph_c0	gi|326891615|gb|JI405418.1|	56	50	22	0	130	279	401	252	2e-20	73.5
c20982.graph_c0	gi|326893551|gb|JI407354.1|	66.67	15	5	0	483	527	166	122	0.036	32.7
c20987.graph_c0	gi|326892099|gb|JI405902.1|	29.03	31	22	0	53	145	252	344	0.39	29
c21.graph_c0	gi|326889328|gb|JI403131.1|	50	24	12	0	73	2	386	315	0.013	32.7
c21009.graph_c0	gi|326891230|gb|JI405033.1|	45.83	24	13	0	200	271	70	141	0.15	29.9
c21021.graph_c0	gi|326889517|gb|JI403320.1|	37.04	27	17	0	313	233	334	414	0.71	27.6
c21027.graph_c0	gi|326894823|gb|JI408626.1|	64.96	117	41	0	3	353	259	609	2e-50	192
c21028.graph_c0	gi|326889971|gb|JI403774.1|	57.89	19	8	0	154	98	183	127	0.12	29
c21033.graph_c0	gi|326891799|gb|JI405602.1|	58.82	17	7	0	279	329	208	258	0.57	28.1
c21049.graph_c0	gi|326892657|gb|JI406460.1|	50	16	8	0	202	249	417	464	1	26.7
c21055.graph_c0	gi|326895177|gb|JI408980.1|	52.17	23	11	0	280	212	187	255	0.37	28.6
c21064.graph_c0	gi|326891869|gb|JI405672.1|	40	25	15	0	196	122	351	425	0.64	27.2
c21066.graph_c0	gi|326896917|gb|JI410720.1|	47.62	21	11	0	175	113	120	58	0.3	27.6
c21068.graph_c0	gi|326897811|gb|JI411614.1|	42.31	26	15	0	60	137	122	45	0.85	26.3
c21069.graph_c0	gi|326886950|gb|JI400753.1|	57.14	21	9	0	201	263	63	1	0.006	27.2
c2109.graph_c0	gi|326895412|gb|JI409215.1|	40	25	15	0	123	49	160	234	0.89	26.7
c21097.graph_c0	gi|326895745|gb|JI409548.1|	66.67	60	20	0	214	35	7	186	3e-25	107
c21101.graph_c0	gi|326894117|gb|JI407920.1|	55	20	9	0	152	93	212	153	0.55	27.2
c21108.graph_c0	gi|326889347|gb|JI403150.1|	42.31	26	15	0	130	207	512	435	0.14	29.5
c21110.graph_c0	gi|326893472|gb|JI407275.1|	50	30	15	0	504	593	106	17	0.21	30.4
c21129.graph_c0	gi|326888480|gb|JI402283.1|	54.55	22	10	0	83	148	169	104	0.83	26.3
c21135.graph_c0	gi|326890954|gb|JI404757.1|	47.37	19	10	0	123	179	222	166	0.095	24.4
c2114.graph_c0	gi|326895026|gb|JI408829.1|	50	22	11	0	245	180	284	219	0.61	27.2
c21140.graph_c0	gi|326895061|gb|JI408864.1|	47.83	23	12	0	202	270	210	142	0.7	27.6
c21142.graph_c0	gi|326890535|gb|JI404338.1|	42.22	45	26	0	82	216	212	78	6e-08	51.6
c21147.graph_c0	gi|326895332|gb|JI409135.1|	40.74	27	16	0	352	272	491	411	0.39	28.6
c21149.graph_c0	gi|326895440|gb|JI409243.1|	44	75	42	0	226	2	657	433	6e-23	100
c2115.graph_c0	gi|326894483|gb|JI408286.1|	48.15	27	14	0	145	65	166	246	0.042	31.8
c21152.graph_c0	gi|326893947|gb|JI407750.1|	50	22	11	0	305	240	252	187	1.1	26.7
c21155.graph_c0	gi|326889088|gb|JI402891.1|	42.86	21	12	0	99	161	218	156	0.17	30.4
c21159.graph_c0	gi|326893308|gb|JI407111.1|	34.15	41	27	0	58	180	195	73	0.15	29
c2116.graph_c0	gi|326895691|gb|JI409494.1|	64.71	17	6	0	102	152	302	252	0.009	25.4
c21162.graph_c0	gi|326895316|gb|JI409119.1|	32.5	40	27	0	6	125	677	558	0.3	28.1
c21163.graph_c0	gi|326889315|gb|JI403118.1|	33.33	30	20	0	177	88	305	394	1.6	25.4
c2117.graph_c0	gi|326895316|gb|JI409119.1|	38.89	36	22	0	90	197	80	187	0.03	32.2
c2118.graph_c0	gi|326896035|gb|JI409838.1|	50	20	10	0	158	99	35	94	0.45	27.6
c21186.graph_c0	gi|326898178|gb|JI411981.1|	51.61	62	30	0	946	761	188	3	3e-15	77.1
c2119.graph_c0	gi|326889509|gb|JI403312.1|	92.68	41	3	0	212	90	138	16	2e-20	91.8
c21194.graph_c0	gi|326896046|gb|JI409849.1|	78.16	87	19	0	91	351	880	620	2e-47	182
c212.graph_c0	gi|326895244|gb|JI409047.1|	62.86	35	13	0	202	306	350	246	8e-16	56.1
c2120.graph_c0	gi|326887460|gb|JI401263.1|	56.52	23	10	0	49	117	216	148	0.005	35
c21208.graph_c0	gi|326895382|gb|JI409185.1|	63.64	22	8	0	68	3	124	59	0.003	35
c21209.graph_c0	gi|326896086|gb|JI409889.1|	46.34	41	22	0	127	5	810	688	1e-06	45.5
c21213.graph_c0	gi|326889722|gb|JI403525.1|	36	25	16	0	34	108	145	71	0.048	30.4
c21216.graph_c0	gi|326891963|gb|JI405766.1|	39.29	28	17	0	79	162	207	290	0.072	30.4
c2122.graph_c0	gi|326894766|gb|JI408569.1|	67.97	128	41	0	10	393	123	506	2e-57	215
c21228.graph_c0	gi|326893859|gb|JI407662.1|	64.29	14	5	0	319	278	237	196	0.74	27.6
c2123.graph_c0	gi|326896055|gb|JI409858.1|	46.43	28	15	0	217	300	447	364	0.053	31.8
c21230.graph_c0	gi|326894551|gb|JI408354.1|	50	24	12	0	113	184	231	160	1.9	25.4
c21233.graph_c0	gi|326891723|gb|JI405526.1|	66.67	12	4	0	303	268	117	152	0.24	29
c21234.graph_c0	gi|326892924|gb|JI406727.1|	55	20	9	0	249	190	319	260	1	26.7
c2124.graph_c0	gi|326893571|gb|JI407374.1|	37.04	27	17	0	397	477	288	208	0.24	29.9
c21243.graph_c0	gi|326891665|gb|JI405468.1|	40.54	37	22	0	112	2	6	116	0.008	34.5
c21252.graph_c0	gi|326892268|gb|JI406071.1|	45	20	11	0	464	405	140	199	1.1	27.6
c21255.graph_c0	gi|326895795|gb|JI409598.1|	24.56	57	43	0	48	218	400	230	0.23	29
c2126.graph_c0	gi|326891811|gb|JI405614.1|	34.78	46	30	0	217	80	173	36	0.5	28.1
c21263.graph_c0	gi|326897164|gb|JI410967.1|	53.85	26	12	0	296	219	22	99	0.06	30.9
c21268.graph_c0	gi|326891004|gb|JI404807.1|	32.35	34	23	0	201	100	400	299	0.099	29.9
c2127.graph_c0	gi|326891565|gb|JI405368.1|	41.94	31	18	0	118	210	227	135	0.45	28.1
c21273.graph_c0	gi|326891776|gb|JI405579.1|	41.38	29	17	0	168	82	182	96	0.22	29
c21275.graph_c0	gi|326888510|gb|JI402313.1|	33.33	48	32	0	520	377	102	245	0.71	28.6
c21278.graph_c0	gi|326893377|gb|JI407180.1|	37.84	37	23	0	124	14	471	361	0.64	27.6
c2128.graph_c0	gi|326892442|gb|JI406245.1|	61.54	13	5	0	155	193	162	124	1.5	25.8
c21289.graph_c0	gi|326895257|gb|JI409060.1|	40	25	15	0	104	178	571	645	0.058	31.3
c2129.graph_c0	gi|326895956|gb|JI409759.1|	45	20	11	0	181	122	579	520	0.23	29
c21291.graph_c0	gi|326895408|gb|JI409211.1|	75	12	3	0	114	149	1166	1131	0.25	29
c21295.graph_c0	gi|326889315|gb|JI403118.1|	50	16	8	0	198	151	430	477	0.85	27.2
c21298.graph_c0	gi|326896155|gb|JI409958.1|	44.44	27	15	0	156	236	72	152	0.063	30.9
c2130.graph_c0	gi|326889357|gb|JI403160.1|	87.5	8	1	0	90	113	323	300	0.018	24
c21303.graph_c0	gi|326893081|gb|JI406884.1|	40	25	15	0	80	154	99	25	0.16	29.5
c2131.graph_c0	gi|326892031|gb|JI405834.1|	40.91	22	13	0	74	9	253	188	0.21	29
c21315.graph_c0	gi|326895739|gb|JI409542.1|	52.63	38	18	0	197	84	833	946	8e-13	51
c21319.graph_c0	gi|326895673|gb|JI409476.1|	52.63	19	9	0	226	170	271	327	0.38	28.1
c2132.graph_c0	gi|326890795|gb|JI404598.1|	55.56	36	16	0	181	74	287	394	5e-10	53.3
c21325.graph_c0	gi|326897842|gb|JI411645.1|	64.29	14	5	0	44	3	137	178	0.024	24.4
c2134.graph_c0	gi|326895578|gb|JI409381.1|	45	20	11	0	119	178	128	69	0.93	27.2
c2134.graph_c1	gi|326892512|gb|JI406315.1|	58.82	17	7	0	78	128	132	182	1.2	26.3
c2135.graph_c0	gi|326889629|gb|JI403432.1|	33.33	36	24	0	10	117	8	115	0.34	29
c21354.graph_c0	gi|326895440|gb|JI409243.1|	40.91	22	13	0	97	162	323	258	0.42	28.1
c2136.graph_c0	gi|326887268|gb|JI401071.1|	40.74	27	16	0	123	203	57	137	1.1	26.7
c21360.graph_c0	gi|326892845|gb|JI406648.1|	40.54	37	22	0	174	284	210	320	0.33	28.6
c21365.graph_c0	gi|326893990|gb|JI407793.1|	50	14	7	0	239	280	213	172	0.069	24.9
c21369.graph_c0	gi|326889760|gb|JI403563.1|	44.44	27	15	0	139	219	129	49	0.32	28.6
c2137.graph_c0	gi|326893463|gb|JI407266.1|	100	70	0	0	361	152	210	1	5e-42	164
c2138.graph_c0	gi|326895210|gb|JI409013.1|	75	8	2	0	182	159	1290	1267	0.93	26.7
c21383.graph_c0	gi|326889488|gb|JI403291.1|	36.36	33	21	0	192	94	192	290	0.84	27.2
c21386.graph_c0	gi|326893856|gb|JI407659.1|	43.48	23	13	0	171	239	317	249	0.23	28.6
c2139.graph_c0	gi|326893716|gb|JI407519.1|	53.85	26	12	0	160	237	235	312	0.0001	39.2
c21394.graph_c0	gi|326896255|gb|JI410058.1|	47.62	21	11	0	292	230	83	145	0.34	29
c2140.graph_c0	gi|326890526|gb|JI404329.1|	52.94	17	8	0	14	64	870	820	0.61	28.1
c2140.graph_c1	gi|326892563|gb|JI406366.1|	56.25	16	7	0	309	356	708	755	2.5	26.3
c21407.graph_c0	gi|326891346|gb|JI405149.1|	45.83	24	13	0	86	157	116	45	0.31	27.6
c2141.graph_c0	gi|326892305|gb|JI406108.1|	60	15	6	0	49	93	71	27	2.2	25.8
c2141.graph_c1	gi|326893734|gb|JI407537.1|	37.14	35	22	0	150	46	355	251	0.14	29.9
c21413.graph_c0	gi|326895324|gb|JI409127.1|	35	20	13	0	59	118	187	128	0.097	29.5
c21421.graph_c0	gi|326891858|gb|JI405661.1|	36.11	36	23	0	45	152	89	196	1	26.7
c21424.graph_c0	gi|326890240|gb|JI404043.1|	37.93	29	18	0	137	223	196	110	0.51	27.6
c21427.graph_c0	gi|326886606|gb|JI400409.1|	46.15	26	14	0	86	9	205	128	0.34	29
c2143.graph_c0	gi|326896393|gb|JI410196.1|	33.33	36	24	0	155	48	340	233	0.62	27.6
c2144.graph_c0	gi|326887423|gb|JI401226.1|	45.45	22	12	0	83	18	246	311	0.23	29.9
c21441.graph_c0	gi|326890947|gb|JI404750.1|	40	35	21	0	83	187	169	65	0.1	29.9
c21446.graph_c0	gi|326895906|gb|JI409709.1|	76.19	42	10	0	141	16	607	482	4e-19	88.6
c2145.graph_c0	gi|326897740|gb|JI411543.1|	44.83	29	16	0	97	11	89	175	0.022	32.7
c21456.graph_c0	gi|326887334|gb|JI401137.1|	37.93	29	18	0	443	529	159	245	0.44	29.5
c21459.graph_c0	gi|326895154|gb|JI408957.1|	30	40	28	0	141	260	241	360	0.081	30.4
c21469.graph_c0	gi|326894544|gb|JI408347.1|	32.14	28	19	0	50	133	347	430	0.33	27.6
c2147.graph_c0	gi|326890468|gb|JI404271.1|	37.04	27	17	0	312	392	165	85	1.2	27.2
c2148.graph_c0	gi|326898031|gb|JI411834.1|	36.84	19	12	0	749	693	66	122	3	27.2
c2149.graph_c0	gi|326893644|gb|JI407447.1|	50	24	12	0	5	76	170	99	1.7	26.3
c21496.graph_c0	gi|326897740|gb|JI411543.1|	62.07	29	11	0	184	98	175	89	8e-09	42.3
c215.graph_c0	gi|326897087|gb|JI410890.1|	36.11	36	23	0	188	81	179	72	1.8	26.3
c215.graph_c1	gi|326896725|gb|JI410528.1|	37.5	24	15	0	96	167	196	125	0.44	27.6
c2151.graph_c0	gi|326897890|gb|JI411693.1|	57.89	19	8	0	222	166	57	1	0.35	28.6
c2152.graph_c0	gi|326894574|gb|JI408377.1|	100	8	0	0	226	249	677	700	0.009	25.8
c2153.graph_c0	gi|326895902|gb|JI409705.1|	63.64	11	4	0	155	123	195	163	1.9	26.3
c21539.graph_c0	gi|326894066|gb|JI407869.1|	62.24	98	37	0	2	295	125	418	5e-28	117
c21543.graph_c0	gi|326894487|gb|JI408290.1|	54.55	22	10	0	221	156	14	79	0.19	29
c2155.graph_c0	gi|326886786|gb|JI400589.1|	45	20	11	0	238	297	101	42	0.57	27.6
c21563.graph_c0	gi|326888917|gb|JI402720.1|	42.31	26	15	0	78	155	90	13	0.54	27.6
c2157.graph_c0	gi|326891474|gb|JI405277.1|	52.94	17	8	0	112	162	43	93	2.2	25.8
c2158.graph_c0	gi|326891221|gb|JI405024.1|	43.75	16	9	0	145	98	108	61	0.26	28.6
c21595.graph_c0	gi|326895115|gb|JI408918.1|	43.48	23	13	0	155	87	325	257	0.65	27.2
c21598.graph_c0	gi|326890315|gb|JI404118.1|	46.15	26	14	0	219	296	126	203	0.091	30.4
c216.graph_c0	gi|326890010|gb|JI403813.1|	45	20	11	0	131	190	71	12	0.009	25.8
c21603.graph_c0	gi|326892934|gb|JI406737.1|	50	20	10	0	252	193	299	240	0.022	24.9
c21605.graph_c0	gi|326895436|gb|JI409239.1|	50	24	12	0	130	59	114	185	0.23	29.5
c21608.graph_c0	gi|326892091|gb|JI405894.1|	29.73	37	26	0	208	98	139	29	0.36	28.6
c21609.graph_c0	gi|326893377|gb|JI407180.1|	45.83	24	13	0	123	52	681	752	0.42	28.1
c2161.graph_c0	gi|326895143|gb|JI408946.1|	71.43	14	4	0	52	11	272	313	0.83	28.1
c2162.graph_c0	gi|326893451|gb|JI407254.1|	35	60	39	0	202	23	405	226	0.001	36.9
c2163.graph_c0	gi|326890793|gb|JI404596.1|	34.21	38	25	0	55	168	285	172	0.15	29.9
c2164.graph_c0	gi|326891604|gb|JI405407.1|	47.62	21	11	0	462	524	429	491	0.16	30.9
c2164.graph_c1	gi|326892581|gb|JI406384.1|	25.81	31	23	0	179	87	191	283	1.3	27.2
c2165.graph_c0	gi|326898096|gb|JI411899.1|	50	22	11	0	259	194	252	317	0.17	29.9
c21657.graph_c0	gi|326890000|gb|JI403803.1|	44	25	14	0	282	356	407	333	0.11	30.4
c2166.graph_c0	gi|326891549|gb|JI405352.1|	40	20	12	0	17	76	136	195	0.65	27.2
c21674.graph_c0	gi|326895602|gb|JI409405.1|	42.86	28	16	0	384	467	65	148	1.3	28.1
c2168.graph_c0	gi|326892786|gb|JI406589.1|	47.83	23	12	0	199	131	345	277	0.001	29
c21691.graph_c0	gi|326890310|gb|JI404113.1|	42.42	33	19	0	134	36	151	53	0.64	27
c21692.graph_c0	gi|326897386|gb|JI411189.1|	23.53	51	39	0	192	40	264	112	0.25	28.1
c21695.graph_c0	gi|326894817|gb|JI408620.1|	34.29	35	23	0	69	173	1155	1259	0.35	28.1
c21698.graph_c0	gi|326892719|gb|JI406522.1|	39.47	38	23	0	388	275	714	827	0.024	33.1
c2172.graph_c0	gi|326892102|gb|JI405905.1|	39.29	28	17	0	391	308	15	98	1	27.6
c21720.graph_c0	gi|326886795|gb|JI400598.1|	39.39	33	20	0	62	160	113	211	0.017	32.2
c21726.graph_c0	gi|326889019|gb|JI402822.1|	45.83	24	13	0	141	212	50	121	0.12	29.4
c2173.graph_c0	gi|326891356|gb|JI405159.1|	47.62	21	11	0	214	276	194	256	0.95	26.7
c21730.graph_c0	gi|326896880|gb|JI410683.1|	61.11	18	7	0	243	296	12	65	0.18	29.5
c21738.graph_c0	gi|326897340|gb|JI411143.1|	73.33	15	4	0	406	450	226	182	0.0007	38.1
c2174.graph_c0	gi|326897498|gb|JI411301.1|	36.67	30	19	0	239	328	213	302	0.077	30.9
c21742.graph_c0	gi|326895963|gb|JI409766.1|	33.33	30	20	0	187	98	411	500	0.12	29
c21752.graph_c0	gi|326892660|gb|JI406463.1|	35.29	34	22	0	187	86	62	163	0.076	30.4
c2176.graph_c0	gi|326889925|gb|JI403728.1|	28.21	39	28	0	19	135	211	95	0.085	29.5
c21768.graph_c0	gi|326892453|gb|JI406256.1|	30.61	49	34	0	189	43	650	504	0.36	27.6
c2177.graph_c0	gi|326892026|gb|JI405829.1|	60	10	4	0	112	83	235	206	0.39	21.7
c2178.graph_c0	gi|326893111|gb|JI406914.1|	46.67	15	8	0	233	277	394	350	0.45	23.5
c2179.graph_c0	gi|326888396|gb|JI402199.1|	45.45	22	12	0	312	247	443	378	0.42	23.1
c21797.graph_c0	gi|326889186|gb|JI402989.1|	38.46	39	24	0	109	225	51	167	0.058	30.9
c2180.graph_c0	gi|326890712|gb|JI404515.1|	66.67	12	4	0	36	1	397	432	1.4	25.8
c21803.graph_c0	gi|326889101|gb|JI402904.1|	68.57	35	11	0	197	93	160	264	9e-13	57.5
c2181.graph_c0	gi|326892057|gb|JI405860.1|	64.71	17	6	0	235	185	457	407	0.23	28.6
c2182.graph_c0	gi|326890680|gb|JI404483.1|	68.42	19	6	0	610	666	252	308	0.042	33.1
c2182.graph_c1	gi|326888563|gb|JI402366.1|	60	20	8	0	234	293	68	9	0.054	31.3
c2183.graph_c0	gi|326896124|gb|JI409927.1|	43.33	30	17	0	267	178	183	272	0.007	34.1
c2184.graph_c0	gi|326896793|gb|JI410596.1|	100	17	0	0	349	299	53	3	2e-07	49.2
c2185.graph_c0	gi|326892244|gb|JI406047.1|	43.48	23	13	0	118	50	309	241	0.38	27.6
c21856.graph_c0	gi|326892430|gb|JI406233.1|	34.69	49	32	0	4	150	141	287	0.094	30.9
c21859.graph_c0	gi|326897311|gb|JI411114.1|	50	20	10	0	229	170	182	123	1.2	26.3
c21862.graph_c0	gi|326897233|gb|JI411036.1|	40	25	15	0	156	230	300	374	0.13	30.4
c21866.graph_c0	gi|326893754|gb|JI407557.1|	52.63	19	9	0	269	213	94	38	0.13	29.9
c2187.graph_c0	gi|326886812|gb|JI400615.1|	51.85	27	13	0	137	57	226	306	0.034	31.8
c21873.graph_c0	gi|326895776|gb|JI409579.1|	61.11	18	7	0	169	116	364	417	0.006	34.1
c21874.graph_c0	gi|326893756|gb|JI407559.1|	38.46	26	16	0	265	188	434	357	0.69	27.6
c21877.graph_c0	gi|326891599|gb|JI405402.1|	34.29	35	23	0	174	70	284	180	0.17	29
c2188.graph_c0	gi|326889863|gb|JI403666.1|	57.14	21	9	0	63	1	28	90	0.028	31.7
c21882.graph_c0	gi|326891782|gb|JI405585.1|	54.55	22	10	0	253	188	111	46	0.49	27.6
c21883.graph_c0	gi|326896011|gb|JI409814.1|	52.63	19	9	0	77	133	362	306	0.54	27.6
c21899.graph_c0	gi|326892311|gb|JI406114.1|	57.89	19	8	0	141	85	299	243	0.27	28.1
c219.graph_c0	gi|326890866|gb|JI404669.1|	58.33	24	10	0	175	104	161	90	0.067	29.9
c2190.graph_c0	gi|326890082|gb|JI403885.1|	59.42	69	28	0	211	5	336	130	2e-20	93.2
c21904.graph_c0	gi|326895197|gb|JI409000.1|	39.29	28	17	0	202	119	152	69	0.47	29
c21907.graph_c0	gi|326888996|gb|JI402799.1|	45.45	22	12	0	144	209	107	42	0.32	27.6
c21915.graph_c0	gi|326894696|gb|JI408499.1|	54.05	37	17	0	3	113	538	428	4e-16	52.4
c21926.graph_c0	gi|326887694|gb|JI401497.1|	37.5	24	15	0	173	102	208	137	0.57	26.7
c21928.graph_c0	gi|326898137|gb|JI411940.1|	36.96	46	29	0	559	422	89	226	7e-07	48.7
c2193.graph_c0	gi|326891747|gb|JI405550.1|	38.71	31	19	0	75	167	148	56	0.19	28.6
c21931.graph_c0	gi|326888443|gb|JI402246.1|	40.74	27	16	0	202	122	188	268	0.46	27.2
c21934.graph_c0	gi|326894755|gb|JI408558.1|	44	25	14	0	4	78	582	508	0.36	27.6
c2194.graph_c0	gi|326891994|gb|JI405797.1|	29.03	31	22	0	178	270	31	123	0.7	27.2
c21956.graph_c0	gi|326893268|gb|JI407071.1|	55.56	18	8	0	332	279	534	587	0.12	30.4
c2196.graph_c0	gi|326895429|gb|JI409232.1|	50	24	12	0	177	248	612	541	0.86	28.1
c21969.graph_c0	gi|326887388|gb|JI401191.1|	37.21	43	27	0	128	256	457	585	0.083	30.4
c2197.graph_c0	gi|326889033|gb|JI402836.1|	40.91	22	13	0	98	163	242	177	1.1	27.6
c2198.graph_c0	gi|326893752|gb|JI407555.1|	100	8	0	0	1	24	135	112	3.2	25.8
c21984.graph_c0	gi|326887266|gb|JI401069.1|	44.83	29	16	0	101	187	179	93	0.83	26.3
c21986.graph_c0	gi|326895256|gb|JI409059.1|	64.29	14	5	0	181	140	243	284	1.1	25.8
c2200.graph_c0	gi|326893652|gb|JI407455.1|	61.9	42	16	0	155	280	201	326	1e-13	65.8
c22006.graph_c0	gi|326895529|gb|JI409332.1|	70	10	3	0	48	19	993	1022	0.3	27.6
c2201.graph_c0	gi|326895999|gb|JI409802.1|	68.42	76	24	0	31	258	3	230	2e-42	140
c2202.graph_c0	gi|326896293|gb|JI410096.1|	30.43	23	16	0	10	78	153	221	0.35	27.6
c22023.graph_c0	gi|326898268|gb|JI412071.1|	100	12	0	0	366	331	38	3	0.005	35
c22025.graph_c0	gi|326888512|gb|JI402315.1|	56	25	11	0	107	33	144	70	0.007	33.6
c2203.graph_c0	gi|326896273|gb|JI410076.1|	58.33	12	5	0	420	385	145	110	0.22	24.4
c2204.graph_c0	gi|326893444|gb|JI407247.1|	66.67	12	4	0	58	93	136	171	1.2	25.8
c22040.graph_c0	gi|326887492|gb|JI401295.1|	42.86	28	16	0	227	310	24	107	0.65	27.6
c22044.graph_c0	gi|326889643|gb|JI403446.1|	50	22	11	0	34	99	183	248	0.53	28.1
c22047.graph_c0	gi|326896655|gb|JI410458.1|	66.67	78	26	0	236	3	3	236	3e-24	105
c22051.graph_c0	gi|326896371|gb|JI410174.1|	45	20	11	0	74	15	297	238	1.2	25.8
c22053.graph_c0	gi|326895369|gb|JI409172.1|	42.31	26	15	0	149	72	224	147	0.8	27.2
c22058.graph_c0	gi|326896970|gb|JI410773.1|	44.83	29	16	0	401	315	36	122	1.4	27.6
c2206.graph_c0	gi|326891494|gb|JI405297.1|	57.14	14	6	0	254	295	113	72	0.009	26.7
c22069.graph_c0	gi|326888117|gb|JI401920.1|	36.67	30	19	0	292	203	841	752	0.55	27.6
c2207.graph_c0	gi|326890827|gb|JI404630.1|	63.64	11	4	0	5	37	388	356	1.3	26.3
c2208.graph_c0	gi|326898178|gb|JI411981.1|	55.56	45	20	0	7	141	137	3	2e-13	70.3
c2209.graph_c0	gi|326888911|gb|JI402714.1|	34.48	29	19	0	30	116	9	95	0.35	28.1
c22098.graph_c0	gi|326889743|gb|JI403546.1|	26.09	23	17	0	160	92	109	177	0.97	26.7
c22099.graph_c0	gi|326891956|gb|JI405759.1|	47.83	23	12	0	81	13	231	299	1.3	26.7
c2211.graph_c0	gi|326888935|gb|JI402738.1|	68	25	8	0	55	129	2	76	1e-06	46
c22114.graph_c0	gi|326894792|gb|JI408595.1|	40	20	12	0	336	395	386	445	0.66	29
c2212.graph_c0	gi|326889014|gb|JI402817.1|	37.5	24	15	0	89	160	174	103	0.35	27.6
c22123.graph_c0	gi|326887436|gb|JI401239.1|	48	25	13	0	128	202	57	131	0.17	28.6
c2213.graph_c0	gi|326896000|gb|JI409803.1|	28.26	46	33	0	61	198	254	391	0.11	30.4
c2214.graph_c0	gi|326894050|gb|JI407853.1|	50	24	12	0	133	204	168	97	0.088	30.4
c2215.graph_c0	gi|326887677|gb|JI401480.1|	42.86	21	12	0	122	184	513	451	0.73	27.6
c2215.graph_c1	gi|326894472|gb|JI408275.1|	30	60	42	0	155	334	226	47	0.18	29.9
c22150.graph_c0	gi|326895049|gb|JI408852.1|	52.63	19	9	0	219	275	762	706	0.34	29
c22157.graph_c0	gi|326888218|gb|JI402021.1|	36	50	32	0	151	2	173	24	0.013	32.7
c2216.graph_c0	gi|326897768|gb|JI411571.1|	64.29	14	5	0	221	262	138	97	0.35	28.1
c22167.graph_c0	gi|326891335|gb|JI405138.1|	47.62	21	11	0	259	321	217	155	0.56	28.1
c22186.graph_c0	gi|326896307|gb|JI410110.1|	24.32	37	28	0	268	158	184	74	0.85	27.2
c2219.graph_c0	gi|326892746|gb|JI406549.1|	47.37	19	10	0	240	184	143	199	0.77	26.7
c22199.graph_c0	gi|326890815|gb|JI404618.1|	30.77	39	27	0	118	2	278	162	0.73	27.2
c2220.graph_c0	gi|326894047|gb|JI407850.1|	55	20	9	0	554	495	132	73	0.26	29.9
c22201.graph_c0	gi|326887683|gb|JI401486.1|	42.11	19	11	0	59	3	164	108	0.61	27.6
c22213.graph_c0	gi|326898151|gb|JI411954.1|	64.71	17	6	0	118	68	24	74	0.34	28.6
c2222.graph_c0	gi|326893115|gb|JI406918.1|	30	50	35	0	405	554	49	198	0.042	32.7
c22223.graph_c0	gi|326893603|gb|JI407406.1|	33.33	30	20	0	250	161	413	324	0.72	27.2
c22226.graph_c0	gi|326888970|gb|JI402773.1|	54.17	24	11	0	154	83	198	127	0.0004	26.7
c2223.graph_c0	gi|326890269|gb|JI404072.1|	33.33	27	18	0	118	38	104	24	0.35	28.1
c2224.graph_c0	gi|326890032|gb|JI403835.1|	66.67	15	5	0	266	222	194	238	0.005	27.2
c2224.graph_c1	gi|326897690|gb|JI411493.1|	55.56	27	12	0	183	263	141	61	0.004	35
c22246.graph_c0	gi|326890645|gb|JI404448.1|	36	25	16	0	162	88	143	69	0.69	26.7
c2225.graph_c0	gi|326893325|gb|JI407128.1|	33.33	21	14	0	580	518	120	182	0.75	23.5
c22252.graph_c0	gi|326890598|gb|JI404401.1|	47.06	17	9	0	69	19	243	193	2.2	25.8
c2226.graph_c0	gi|326891665|gb|JI405468.1|	35.9	39	25	0	133	17	210	326	0.17	28.6
c22267.graph_c0	gi|326896805|gb|JI410608.1|	48.28	29	15	0	636	722	86	172	0.011	35
c2227.graph_c0	gi|326895045|gb|JI408848.1|	49.5	101	51	0	90	392	704	1006	7e-31	127
c2228.graph_c0	gi|326896033|gb|JI409836.1|	60	15	6	0	6	50	450	494	0.008	28.6
c22280.graph_c0	gi|326887773|gb|JI401576.1|	80	15	3	0	76	32	156	112	1e-08	34.1
c2229.graph_c0	gi|326892708|gb|JI406511.1|	30	40	28	0	203	84	114	233	0.33	27.6
c22290.graph_c0	gi|326891873|gb|JI405676.1|	55	20	9	0	9	68	105	164	0.1	29.5
c2230.graph_c0	gi|326891132|gb|JI404935.1|	100	96	0	0	289	2	693	406	7e-69	253
c2230.graph_c1	gi|326891132|gb|JI404935.1|	98.26	115	2	0	1	345	377	33	1e-73	269
c22300.graph_c0	gi|326895315|gb|JI409118.1|	40	25	15	0	141	215	1424	1350	0.41	29
c2231.graph_c0	gi|326894382|gb|JI408185.1|	52.38	21	10	0	91	29	48	110	0.005	35
c2232.graph_c0	gi|326897396|gb|JI411199.1|	45.71	35	19	0	714	818	147	43	0.36	30.4
c22322.graph_c0	gi|326892523|gb|JI406326.1|	31.43	35	24	0	5	109	306	202	0.25	29
c22324.graph_c0	gi|326892459|gb|JI406262.1|	45	20	11	0	174	115	264	205	2	26.3
c2233.graph_c0	gi|326895265|gb|JI409068.1|	40.54	37	22	0	168	58	24	134	0.47	27.6
c2233.graph_c1	gi|326896240|gb|JI410043.1|	54.55	22	10	0	157	222	160	225	0.67	26.7
c22334.graph_c0	gi|326890133|gb|JI403936.1|	34.48	29	19	0	256	170	719	633	0.47	27.6
c22341.graph_c0	gi|326890454|gb|JI404257.1|	32	50	34	0	62	211	247	396	0.11	30.4
c22349.graph_c0	gi|326895153|gb|JI408956.1|	50	22	11	0	25	90	135	200	0.26	29
c2235.graph_c0	gi|326895201|gb|JI409004.1|	38.46	26	16	0	89	12	268	345	1.1	28.1
c2235.graph_c1	gi|326889274|gb|JI403077.1|	41.38	29	17	0	252	166	39	125	0.066	30.9
c2236.graph_c0	gi|326891891|gb|JI405694.1|	36.36	22	14	0	253	318	147	212	0.29	29
c22360.graph_c0	gi|326897563|gb|JI411366.1|	34.48	29	19	0	146	60	295	209	2.6	24.9
c22364.graph_c0	gi|326887662|gb|JI401465.1|	28.3	53	38	0	194	352	208	50	0.77	27.6
c22369.graph_c0	gi|326887584|gb|JI401387.1|	48.15	27	14	0	183	263	285	205	0.016	32.7
c22375.graph_c0	gi|326888618|gb|JI402421.1|	53.57	28	13	0	341	424	62	145	0.45	29
c22376.graph_c0	gi|326895209|gb|JI409012.1|	45.24	42	23	0	5	130	61	186	4e-05	40.9
c2238.graph_c0	gi|326895729|gb|JI409532.1|	60	20	8	0	278	337	258	317	0.2	25.8
c2238.graph_c1	gi|326890133|gb|JI403936.1|	61.76	136	52	0	1	408	85	492	3e-54	205
c22394.graph_c0	gi|326896352|gb|JI410155.1|	34.15	41	27	0	92	214	274	152	0.16	30.4
c2240.graph_c0	gi|326890055|gb|JI403858.1|	40.91	22	13	0	8	73	159	94	0.39	28.6
c2241.graph_c0	gi|326886609|gb|JI400412.1|	61.54	13	5	0	235	197	14	52	3.6	24.4
c22418.graph_c0	gi|326892852|gb|JI406655.1|	39.13	23	14	0	175	107	164	96	0.43	27.2
c2242.graph_c0	gi|326891791|gb|JI405594.1|	65.12	43	15	0	320	192	105	233	4e-12	65
c22422.graph_c0	gi|326894501|gb|JI408304.1|	60	15	6	0	128	172	85	41	0.0001	30.4
c22423.graph_c0	gi|326896404|gb|JI410207.1|	48.39	31	16	0	466	374	120	212	0.17	30.9
c2243.graph_c0	gi|326891863|gb|JI405666.1|	33.33	33	22	0	99	1	253	155	0.041	30.9
c22436.graph_c0	gi|326891866|gb|JI405669.1|	46.15	26	14	0	243	166	128	51	0.28	29.5
c22439.graph_c0	gi|326897903|gb|JI411706.1|	45.83	24	13	0	333	262	26	97	0.007	28.6
c22446.graph_c0	gi|326893715|gb|JI407518.1|	98.46	65	1	0	158	352	288	94	1e-41	162
c2245.graph_c0	gi|326890828|gb|JI404631.1|	45.83	24	13	0	41	112	153	224	0.11	29.9
c22451.graph_c0	gi|326892467|gb|JI406270.1|	47.37	19	10	0	165	221	157	101	0.18	29
c22458.graph_c0	gi|326895277|gb|JI409080.1|	47.83	46	24	0	206	343	593	730	1e-11	49.2
c2246.graph_c0	gi|326893325|gb|JI407128.1|	33.33	39	26	0	254	370	371	255	0.095	31.3
c22466.graph_c0	gi|326886610|gb|JI400413.1|	46.67	30	16	0	129	40	71	160	0.5	28.1
c2247.graph_c0	gi|326894705|gb|JI408508.1|	27.69	65	47	0	305	111	763	569	2.9	25.4
c22471.graph_c0	gi|326896494|gb|JI410297.1|	61.9	21	8	0	172	110	138	200	0.12	29
c22472.graph_c0	gi|326893294|gb|JI407097.1|	38.24	34	21	0	199	98	355	456	0.21	29.5
c22473.graph_c0	gi|326892102|gb|JI405905.1|	64.71	34	12	0	203	102	441	340	5e-10	56.9
c22477.graph_c0	gi|326886944|gb|JI400747.1|	80	10	2	0	280	309	28	57	1.3	27.6
c22480.graph_c0	gi|326888869|gb|JI402672.1|	39.13	23	14	0	282	350	107	39	0.29	29
c22484.graph_c0	gi|326898264|gb|JI412067.1|	58.33	12	5	0	266	301	143	178	0.53	28.1
c22487.graph_c0	gi|326894750|gb|JI408553.1|	50	14	7	0	274	233	236	195	0.53	28.1
c22489.graph_c0	gi|326889288|gb|JI403091.1|	75.86	116	28	0	3	350	152	499	2e-61	228
c2249.graph_c0	gi|326894800|gb|JI408603.1|	47.06	17	9	0	240	190	278	228	0.72	27.2
c22493.graph_c0	gi|326893451|gb|JI407254.1|	32.56	43	29	0	33	161	206	334	0.83	27.6
c22494.graph_c0	gi|326895739|gb|JI409542.1|	87.88	33	4	0	3	101	284	382	3e-23	75.3
c22502.graph_c0	gi|326897574|gb|JI411377.1|	56.25	16	7	0	160	207	214	167	1.7	25.4
c22504.graph_c0	gi|326895562|gb|JI409365.1|	47.37	19	10	0	206	262	68	124	0.17	29.9
c22506.graph_c0	gi|326889106|gb|JI402909.1|	45.45	22	12	0	154	89	241	176	3.1	24.9
c2251.graph_c0	gi|326895645|gb|JI409448.1|	62.5	16	6	0	384	337	39	86	0.17	31.3
c22515.graph_c0	gi|326891379|gb|JI405182.1|	62.5	16	6	0	120	73	148	101	0.45	27.2
c2252.graph_c0	gi|326889373|gb|JI403176.1|	77.78	63	14	0	30	218	92	280	3e-29	120
c22524.graph_c0	gi|326896101|gb|JI409904.1|	44	25	14	0	100	174	10	84	0.11	30.4
c22529.graph_c0	gi|326887713|gb|JI401516.1|	55.56	27	12	0	303	223	221	301	0.019	34.1
c2253.graph_c0	gi|326892264|gb|JI406067.1|	40.74	27	16	0	141	221	260	340	0.3	28.6
c22534.graph_c0	gi|326896419|gb|JI410222.1|	45.45	33	18	0	92	190	114	212	0.082	29.9
c2254.graph_c0	gi|326891423|gb|JI405226.1|	45.71	35	19	0	230	126	377	481	5e-09	38.2
c2255.graph_c0	gi|326895167|gb|JI408970.1|	55	20	9	0	34	93	81	22	0.18	29
c22550.graph_c0	gi|326886580|gb|JI400383.1|	47.37	19	10	0	26	82	314	370	0.11	29.9
c22555.graph_c0	gi|326886840|gb|JI400643.1|	66.67	15	5	0	356	312	54	10	0.44	29
c22559.graph_c0	gi|326893543|gb|JI407346.1|	80	10	2	0	203	232	564	593	0.014	26.3
c2256.graph_c0	gi|326894815|gb|JI408618.1|	56.25	16	7	0	81	128	637	684	0.74	27.6
c22565.graph_c0	gi|326895433|gb|JI409236.1|	36.36	22	14	0	195	130	145	210	0.2	22.1
c22569.graph_c0	gi|326894083|gb|JI407886.1|	50	22	11	0	109	44	199	264	0.16	29.5
c2257.graph_c0	gi|326889786|gb|JI403589.1|	60	20	8	0	198	139	290	231	0.096	30.9
c22570.graph_c0	gi|326890721|gb|JI404524.1|	60	65	26	0	53	247	61	255	1e-24	105
c22572.graph_c0	gi|326887781|gb|JI401584.1|	32.35	34	23	0	231	130	241	342	0.52	27.6
c2258.graph_c0	gi|326895845|gb|JI409648.1|	46.15	26	14	0	15	92	306	229	0.065	30.4
c2258.graph_c1	gi|326896345|gb|JI410148.1|	55	20	9	0	239	180	385	326	0.15	29.5
c22588.graph_c0	gi|326895527|gb|JI409330.1|	40	25	15	0	181	107	221	295	0.13	29
c2259.graph_c0	gi|326896305|gb|JI410108.1|	37.5	16	10	0	567	520	53	100	0.92	22.6
c22591.graph_c0	gi|326895888|gb|JI409691.1|	45.83	24	13	0	92	163	170	99	0.42	27.2
c22594.graph_c0	gi|326895690|gb|JI409493.1|	55.56	18	8	0	195	142	327	380	0.79	26.3
c2260.graph_c0	gi|326890750|gb|JI404553.1|	42.31	26	15	0	10	87	260	183	0.16	28.6
c2260.graph_c1	gi|326897817|gb|JI411620.1|	30.77	39	27	0	205	321	10	126	0.57	28.6
c22613.graph_c0	gi|326890811|gb|JI404614.1|	50	14	7	0	97	138	148	107	0.082	23.5
c2262.graph_c0	gi|326889722|gb|JI403525.1|	33.33	30	20	0	204	115	139	50	0.45	27.6
c2262.graph_c1	gi|326893915|gb|JI407718.1|	72.73	11	3	0	201	169	232	264	2	24.9
c22636.graph_c0	gi|326889415|gb|JI403218.1|	50	20	10	0	181	240	79	20	0.89	26.7
c22640.graph_c0	gi|326894333|gb|JI408136.1|	52.94	17	8	0	155	205	241	291	0.83	26.3
c22642.graph_c0	gi|326890713|gb|JI404516.1|	46.15	26	14	0	194	271	82	159	0.74	27.2
c2265.graph_c0	gi|326895087|gb|JI408890.1|	31.25	48	33	0	253	110	177	34	1.1	27.6
c22654.graph_c0	gi|326895609|gb|JI409412.1|	33.33	24	16	0	282	353	80	9	0.98	23.5
c22656.graph_c0	gi|326887688|gb|JI401491.1|	50	14	7	0	298	257	17	58	0.085	30.4
c2266.graph_c0	gi|326896857|gb|JI410660.1|	54.22	83	38	0	460	212	352	104	3e-36	109
c22670.graph_c0	gi|326888790|gb|JI402593.1|	42.86	35	20	0	87	191	327	223	0.058	31.3
c22671.graph_c0	gi|326898223|gb|JI412026.1|	45.45	11	6	0	149	181	99	131	0.005	26.3
c22679.graph_c0	gi|326891633|gb|JI405436.1|	53.85	13	6	0	47	9	625	663	0.47	22.1
c2268.graph_c0	gi|326895087|gb|JI408890.1|	50	22	11	0	143	78	238	173	0.84	26.7
c22685.graph_c0	gi|326888095|gb|JI401898.1|	39.13	23	14	0	244	176	152	220	0.14	29.5
c22688.graph_c0	gi|326890811|gb|JI404614.1|	48.15	27	14	0	196	116	178	98	0.009	34.1
c22695.graph_c0	gi|326890904|gb|JI404707.1|	61.36	44	17	0	330	199	163	32	9e-12	63.8
c22698.graph_c0	gi|326890706|gb|JI404509.1|	73.91	23	6	0	227	295	73	5	8e-06	43.7
c227.graph_c0	gi|326888639|gb|JI402442.1|	85.71	7	1	0	55	35	42	22	2.3	24.9
c2271.graph_c0	gi|326893803|gb|JI407606.1|	76.92	13	3	0	339	377	39	1	2.1	26.3
c22710.graph_c0	gi|326895389|gb|JI409192.1|	52.63	19	9	0	164	220	417	473	0.082	29.9
c22714.graph_c0	gi|326895865|gb|JI409668.1|	64.29	14	5	0	133	92	198	239	2.9	24.9
c22715.graph_c0	gi|326895810|gb|JI409613.1|	52.63	19	9	0	109	165	161	217	1.6	25.4
c2272.graph_c0	gi|326889155|gb|JI402958.1|	70	10	3	0	127	98	96	125	0.015	24.9
c22727.graph_c0	gi|326892325|gb|JI406128.1|	38.1	21	13	0	206	144	342	280	0.86	26.3
c2273.graph_c0	gi|326895341|gb|JI409144.1|	61.11	18	7	0	270	323	439	492	0.054	31.3
c22738.graph_c0	gi|326895139|gb|JI408942.1|	59.76	82	33	0	1	246	295	50	2e-26	111
c22739.graph_c0	gi|326893086|gb|JI406889.1|	70.83	72	21	0	2	217	466	251	1e-30	125
c2274.graph_c0	gi|326891032|gb|JI404835.1|	31.71	41	28	0	128	250	92	214	0.5	29.5
c22746.graph_c0	gi|326893096|gb|JI406899.1|	27.91	43	31	0	440	312	192	64	0.12	30.9
c22747.graph_c0	gi|326897337|gb|JI411140.1|	57.89	19	8	0	270	214	114	58	2	26.3
c22749.graph_c0	gi|326893002|gb|JI406805.1|	43.48	23	13	0	114	46	85	153	0.81	26.7
c2275.graph_c0	gi|326893185|gb|JI406988.1|	39.06	64	39	0	1	192	342	151	6e-11	60.2
c22753.graph_c0	gi|326889651|gb|JI403454.1|	32.35	34	23	0	36	137	206	105	0.36	27.6
c22754.graph_c0	gi|326888435|gb|JI402238.1|	50	24	12	0	490	561	183	254	0.45	29.5
c22759.graph_c0	gi|326895389|gb|JI409192.1|	44.83	29	16	0	63	149	167	81	0.24	28.1
c2276.graph_c0	gi|326897821|gb|JI411624.1|	57.14	14	6	0	156	197	88	129	0.15	29
c22766.graph_c0	gi|326891432|gb|JI405235.1|	43.48	23	13	0	127	195	85	153	0.18	29
c22776.graph_c0	gi|326896461|gb|JI410264.1|	79.41	34	7	0	113	214	192	91	2e-13	68.6
c22777.graph_c0	gi|326896760|gb|JI410563.1|	88.89	9	1	0	51	77	336	310	0.24	28.1
c22779.graph_c0	gi|326887832|gb|JI401635.1|	35.14	37	24	0	22	132	77	187	0.5	28.1
c22785.graph_c0	gi|326888348|gb|JI402151.1|	55.56	18	8	0	249	302	297	244	1.5	26.3
c22790.graph_c0	gi|326891334|gb|JI405137.1|	40.91	22	13	0	135	70	172	237	0.27	28.6
c22796.graph_c0	gi|326890693|gb|JI404496.1|	52.63	19	9	0	253	309	117	173	0.067	25.4
c22799.graph_c0	gi|326887726|gb|JI401529.1|	37.93	29	18	0	124	210	2	88	0.33	30.4
c2280.graph_c0	gi|326897940|gb|JI411743.1|	53.85	26	12	0	142	219	112	189	0.11	30.4
c2281.graph_c0	gi|326890832|gb|JI404635.1|	29.55	44	31	0	212	81	579	448	0.036	31.3
c22811.graph_c0	gi|326896003|gb|JI409806.1|	60	15	6	0	129	173	219	175	1.2	26.3
c2282.graph_c0	gi|326893118|gb|JI406921.1|	37.04	27	17	0	150	70	128	208	0.64	27.2
c22828.graph_c0	gi|326888908|gb|JI402711.1|	31.58	38	26	0	185	72	114	1	0.17	28.6
c2283.graph_c0	gi|326887424|gb|JI401227.1|	55.56	18	8	0	158	105	228	175	0.0002	29
c22830.graph_c0	gi|326891429|gb|JI405232.1|	31.82	44	30	0	208	339	237	106	0.093	31.8
c22833.graph_c0	gi|326895442|gb|JI409245.1|	52.94	17	8	0	253	203	987	937	0.25	28.6
c22834.graph_c0	gi|326897766|gb|JI411569.1|	33.33	39	26	0	49	165	18	134	0.97	26.7
c22836.graph_c0	gi|326895152|gb|JI408955.1|	34.09	44	29	0	64	195	284	153	0.59	28.6
c2284.graph_c0	gi|326889955|gb|JI403758.1|	52.63	19	9	0	25	81	186	130	0.39	28.6
c22841.graph_c0	gi|326892928|gb|JI406731.1|	40.54	37	22	0	93	203	101	211	0.003	35
c22843.graph_c0	gi|326892238|gb|JI406041.1|	41.03	39	23	0	66	182	257	141	0.06	29.9
c2285.graph_c0	gi|326891814|gb|JI405617.1|	39.47	38	23	0	452	339	200	313	8e-07	36.8
c22851.graph_c0	gi|326895760|gb|JI409563.1|	50	62	31	0	26	211	388	203	2e-16	78.5
c22856.graph_c0	gi|326894933|gb|JI408736.1|	34.29	35	23	0	240	136	140	244	0.15	29.9
c2286.graph_c0	gi|326891333|gb|JI405136.1|	57.14	21	9	0	101	163	55	117	0.21	29
c22863.graph_c0	gi|326893845|gb|JI407648.1|	63.64	55	20	0	3	167	614	450	5e-21	93.5
c22869.graph_c0	gi|326892926|gb|JI406729.1|	57.14	14	6	0	184	225	319	278	0.27	28.1
c2287.graph_c0	gi|326896499|gb|JI410302.1|	56.25	16	7	0	653	700	410	363	0.65	27.6
c22887.graph_c0	gi|326888657|gb|JI402460.1|	62.5	16	6	0	201	248	84	37	0.89	26.7
c22895.graph_c0	gi|326897903|gb|JI411706.1|	38.71	31	19	0	94	2	163	71	0.0003	27.6
c2290.graph_c0	gi|326894064|gb|JI407867.1|	38.1	21	13	0	137	199	64	2	0.82	27.6
c22900.graph_c0	gi|326897160|gb|JI410963.1|	52	25	12	0	161	87	199	125	0.033	31.3
c22903.graph_c0	gi|326890507|gb|JI404310.1|	44	25	14	0	75	149	131	57	0.77	26.7
c2291.graph_c0	gi|326891041|gb|JI404844.1|	42.31	26	15	0	127	50	18	95	0.87	26.3
c2291.graph_c1	gi|326891347|gb|JI405150.1|	37.04	27	17	0	113	193	346	266	0.79	26.3
c22919.graph_c0	gi|326889713|gb|JI403516.1|	52.38	21	10	0	145	83	81	19	0.13	29
c22921.graph_c0	gi|326888240|gb|JI402043.1|	41.46	41	24	0	119	241	209	87	2e-05	42.3
c22928.graph_c0	gi|326895715|gb|JI409518.1|	60	20	8	0	80	21	173	232	0.002	28.9
c2293.graph_c0	gi|326891590|gb|JI405393.1|	45.83	24	13	0	197	126	41	112	0.05	24.9
c22933.graph_c0	gi|326892883|gb|JI406686.1|	36.67	30	19	0	25	114	140	229	0.16	31
c22936.graph_c0	gi|326895862|gb|JI409665.1|	47.37	19	10	0	534	478	522	466	0.48	29
c22942.graph_c0	gi|326893219|gb|JI407022.1|	28.57	77	55	0	258	28	3	233	1e-07	49.5
c22944.graph_c0	gi|326895580|gb|JI409383.1|	45.45	22	12	0	104	169	187	122	0.15	29.5
c2295.graph_c0	gi|326887473|gb|JI401276.1|	41.38	29	17	0	120	34	115	29	0.81	27.2
c22953.graph_c0	gi|326890836|gb|JI404639.1|	45.45	22	12	0	315	250	227	162	0.21	23.1
c2296.graph_c0	gi|326891510|gb|JI405313.1|	40	30	18	0	196	107	294	383	0.55	28.6
c22966.graph_c0	gi|326891305|gb|JI405108.1|	52.94	17	8	0	225	175	193	243	1	27.2
c22967.graph_c0	gi|326897213|gb|JI411016.1|	33.33	36	24	0	115	8	177	70	0.33	27.6
c22968.graph_c0	gi|326897645|gb|JI411448.1|	42.86	21	12	0	370	308	92	154	0.81	27.6
c22972.graph_c0	gi|326895342|gb|JI409145.1|	31.58	38	26	0	258	145	354	467	0.19	29
c22975.graph_c0	gi|326895880|gb|JI409683.1|	42.31	26	15	0	116	39	148	225	0.66	27.2
c22976.graph_c0	gi|326894473|gb|JI408276.1|	29.41	34	24	0	296	195	224	123	3.3	25.8
c22977.graph_c0	gi|326893345|gb|JI407148.1|	50	20	10	0	261	202	314	255	0.22	29.5
c22983.graph_c0	gi|326895410|gb|JI409213.1|	57.14	14	6	0	8	49	67	108	0.87	26.3
c22989.graph_c0	gi|326898304|gb|JI412107.1|	58.82	17	7	0	200	150	135	85	0.18	28.6
c2299.graph_c0	gi|326896755|gb|JI410558.1|	45	20	11	0	33	92	165	106	0.42	27.6
c2299.graph_c1	gi|326889064|gb|JI402867.1|	34.38	32	21	0	160	65	362	267	0.27	28.6
c22991.graph_c0	gi|326895731|gb|JI409534.1|	45.16	31	17	0	138	230	204	296	0.068	30.4
c22994.graph_c0	gi|326890426|gb|JI404229.1|	42.31	26	15	0	25	102	84	161	0.1	29.9
c22995.graph_c0	gi|326889104|gb|JI402907.1|	54.55	22	10	0	153	88	161	226	0.18	28.6
c23004.graph_c0	gi|326893523|gb|JI407326.1|	69.23	13	4	0	167	129	263	225	0.41	28.1
c23005.graph_c0	gi|326898143|gb|JI411946.1|	52.38	21	10	0	278	216	110	48	0.14	29.5
c23007.graph_c0	gi|326897351|gb|JI411154.1|	40.74	27	16	0	181	101	136	216	0.33	27.6
c23009.graph_c0	gi|326898223|gb|JI412026.1|	37.93	29	18	0	32	118	208	122	0.0006	28.1
c23012.graph_c0	gi|326896977|gb|JI410780.1|	72.73	11	3	0	189	157	36	68	0.04	24
c2302.graph_c0	gi|326889383|gb|JI403186.1|	46.43	28	15	0	174	91	141	58	0.75	27.6
c23029.graph_c0	gi|326895610|gb|JI409413.1|	36.11	36	23	0	78	185	183	76	0.21	28.1
c2303.graph_c0	gi|326892513|gb|JI406316.1|	34.29	35	23	0	176	72	277	381	0.41	27.6
c23030.graph_c0	gi|326898019|gb|JI411822.1|	39.39	33	20	0	135	233	214	116	0.036	31.3
c23036.graph_c0	gi|326895056|gb|JI408859.1|	37.93	29	18	0	136	222	185	271	3.1	24.9
c23038.graph_c0	gi|326895982|gb|JI409785.1|	41.46	41	24	0	136	14	782	660	4e-06	43.8
c23042.graph_c0	gi|326893460|gb|JI407263.1|	45	20	11	0	94	153	252	193	0.79	27.2
c23047.graph_c0	gi|326890916|gb|JI404719.1|	34.78	23	15	0	10	78	72	4	4.2	24
c23049.graph_c0	gi|326895423|gb|JI409226.1|	23.4	47	36	0	144	4	114	254	0.082	30.9
c2305.graph_c0	gi|326894512|gb|JI408315.1|	24.24	33	25	0	138	40	714	812	2.4	25.4
c23053.graph_c0	gi|326895056|gb|JI408859.1|	33.33	39	26	0	8	124	151	267	0.01	33.1
c23061.graph_c0	gi|326892579|gb|JI406382.1|	40.91	22	13	0	179	244	198	133	2.1	25.4
c23065.graph_c0	gi|326896762|gb|JI410565.1|	75	12	3	0	11	46	234	269	0.037	31.3
c23067.graph_c0	gi|326892938|gb|JI406741.1|	39.29	28	17	0	109	192	633	550	0.44	27.6
c2307.graph_c0	gi|326891061|gb|JI404864.1|	69.23	13	4	0	175	213	158	196	0.12	30.4
c23071.graph_c0	gi|326887585|gb|JI401388.1|	44.83	29	16	0	77	163	132	218	0.019	32.7
c23077.graph_c0	gi|326892657|gb|JI406460.1|	42.86	28	16	0	2	85	445	362	0.08	30.4
c23079.graph_c0	gi|326895137|gb|JI408940.1|	60	15	6	0	59	15	58	14	2.2	24.9
c2308.graph_c0	gi|326893908|gb|JI407711.1|	36.36	22	14	0	82	17	71	6	0.13	29.9
c2308.graph_c1	gi|326887388|gb|JI401191.1|	31.11	45	31	0	163	29	286	152	0.027	32.2
c23087.graph_c0	gi|326889838|gb|JI403641.1|	36.11	36	23	0	154	47	39	146	0.67	26.7
c23089.graph_c0	gi|326887536|gb|JI401339.1|	50	18	9	0	1	54	218	165	0.3	28.1
c2309.graph_c0	gi|326894398|gb|JI408201.1|	33.33	42	28	0	232	107	274	149	0.28	28.1
c23091.graph_c0	gi|326892533|gb|JI406336.1|	43.48	23	13	0	169	101	525	457	0.74	28.1
c2310.graph_c0	gi|326890818|gb|JI404621.1|	72.41	29	8	0	133	47	69	155	5e-07	47.8
c23103.graph_c0	gi|326894855|gb|JI408658.1|	42.86	21	12	0	3	65	206	144	0.92	26.7
c23104.graph_c0	gi|326887058|gb|JI400861.1|	40	55	33	0	246	410	140	304	1e-08	54.1
c23108.graph_c0	gi|326894887|gb|JI408690.1|	27.08	48	35	0	44	187	503	360	1.6	25.4
c23111.graph_c0	gi|326897007|gb|JI410810.1|	38.1	21	13	0	87	149	137	199	0.9	26.3
c2312.graph_c0	gi|326894755|gb|JI408558.1|	47.83	23	12	0	108	40	522	590	0.69	27.6
c23123.graph_c0	gi|326886869|gb|JI400672.1|	41.67	24	14	0	163	92	126	197	0.57	27.6
c23131.graph_c0	gi|326895985|gb|JI409788.1|	41.18	34	20	0	189	88	269	168	0.069	29.9
c2314.graph_c0	gi|326890160|gb|JI403963.1|	38.89	36	22	0	140	247	274	167	1.7	26.7
c2314.graph_c1	gi|326891562|gb|JI405365.1|	37.5	40	25	0	35	154	206	87	0.81	26.3
c23145.graph_c0	gi|326891463|gb|JI405266.1|	57.89	19	8	0	112	168	153	209	0.021	31.8
c2315.graph_c0	gi|326895510|gb|JI409313.1|	37.5	24	15	0	219	148	124	53	1.7	26.3
c23152.graph_c0	gi|326895769|gb|JI409572.1|	78.95	19	4	0	6	62	305	361	0.0007	36.3
c23157.graph_c0	gi|326894794|gb|JI408597.1|	40	20	12	0	76	17	169	110	0.35	27.6
c2316.graph_c0	gi|326894668|gb|JI408471.1|	47.06	17	9	0	186	236	552	502	0.61	27.2
c23160.graph_c0	gi|326895724|gb|JI409527.1|	45.45	33	18	0	113	211	123	25	0.042	31.8
c23167.graph_c0	gi|326895731|gb|JI409534.1|	40	20	12	0	85	144	142	83	2.3	24.9
c2317.graph_c0	gi|326897720|gb|JI411523.1|	37.84	37	23	0	280	170	191	81	0.21	29
c23174.graph_c0	gi|326890133|gb|JI403936.1|	30.36	56	39	0	308	141	182	15	0.003	35.4
c23178.graph_c0	gi|326895318|gb|JI409121.1|	29.73	37	26	0	113	3	148	258	0.87	26.3
c2318.graph_c0	gi|326891267|gb|JI405070.1|	56.25	16	7	0	123	170	281	328	0.59	27.2
c23180.graph_c0	gi|326892453|gb|JI406256.1|	50	14	7	0	94	135	504	463	0.0003	29.5
c23188.graph_c0	gi|326892323|gb|JI406126.1|	81.82	11	2	0	203	171	219	251	0.059	24
c2319.graph_c0	gi|326895527|gb|JI409330.1|	32.56	43	29	0	113	241	194	322	0.19	29
c23194.graph_c0	gi|326890325|gb|JI404128.1|	50	18	9	0	5	58	278	225	0.036	30.9
c23194.graph_c1	gi|326896106|gb|JI409909.1|	38.71	31	19	0	181	89	320	412	0.33	27.6
[truncated: 38,983 more rows]
